# Supplementary material for: Complete Plastome of Three Korean Asarum (Aristolochiaceae): Confirmation Tripartite Structure within Korean Asarum and Comparative Analyses
Source: Plants (Basel). 2021 Sep 29;10(10):2056. doi: 10.3390/plants10102056 (PMC8540983; doi:10.3390/plants10102056)
Supplement: Supplementary file 1 [file plants-10-02056-s001.zip › plants-1389948-supplementary - Table S1-4.xls]

## Sheet: Title page
Complete chloroplast genome of three Korean Asarum (Aristolochiaceae): confirmation tripartite structure within Korean Asarum and comparative analyses
Authors: Mi-Jeong Yoo1, Dong-Pil Jin2 and Hyun-Oh Lee3, and Chae Eun Lim2*
Affiliations: 1Clarkson Unviversity, 8 Clarkson Avenue, Potsdam 13676, NY, USA. 2National Institute of Biological Resources, 42 Hwangyeong-ro, Seo-gu, Incheon 22689, Korea. 3Phyzen Genomics Institute, Seongnam 13558, Korea.
*Correspondence: chaelim@korea.kr

## Sheet: Table S1
Table S1. Sequencing and mapping results for newly sequenced four Korean Aristolochiaeae species
Scientific name	Asarum misandrum	Asarum maculatum		Asarum heterotropoides	Aristolochia contorta
Sequencing platform	Illumina MiSeq	Illumina MiSeq	ONT MinION	Illumina MiSeq	Illumina MiSeq
Total raw reads number	6691402	6862926	524522	8447118	8359606
Total trimmed reads number	5605921	4624218	523864	6918313	6384532
Total raw bases (bp)	2007837240	2057323897	2238879214	2536338575	2483345539
Total trimmed bases (bp)	1348504203	1067628433	2215414853	1679286201	1581058000
Mapped reads number	577151	458888	16166	535388	1298369
Coverage (x)	721	549	291	686	2019

## Sheet: Table S2
Table S3. Information of long sequence repeats across four Korean Asarum species. Red text indicates that SSR is present in one or two species only.
Asamac39	Asarum maculatum						Asamis17	Asarum misandrum						Asasie13	Asarum sieboldi						Asaseo46	Asarum heterotropoides var. seoulense
No.	SSR type	SSR	size	start	end		No.	SSR type	SSR	size	start	end		No.	SSR type	SSR	size	start	end		No.	SSR type	SSR	size	start	end
1	p2	(AT)6	12	5	16		1	p2	(AT)6	12	5	16		1	p2	(AT)6	12	5	16		1	p2	(AT)6	12	5	16
2	p6	(ATATAA)2	12	21	32		2	p6	(ATATAA)2	12	21	32		2	p6	(ATATAA)2	12	21	32		2	c*	(TA)5(ATATAA)3*	23	21	43
3	c	(AT)6(AAATAT)2	24	39	62		3	c	(AT)6(AAATAT)2	24	39	62		3	c	(AT)6(AAATAT)3	30	39	68		3	c	(AT)9(AAATAT)2	30	50	79
4	p6	(TAATAT)2	12	66	77		4	p6	(TAATAT)2	12	66	77		4	p6	(TAATAT)2	12	72	83		4	p5	(AATAT)2	10	84	93
5	p6	(AATATT)2	12	89	100		5	p6	(AATATT)2	12	89	100		5	p6	(AATATT)2	12	95	106
6	p6	(AATATA)3	18	105	122		6	p6	(AATATA)3	18	105	122		6	c	(TAATA)2(AATAT)2	20	122	141
7	p5	(AATAT)2	10	126	135		7	p5	(AATAT)2	10	126	135
8	c*	(TTGCTT)2(TTTGC)2*	15	207	221		8	c*	(TTGCTT)2(TTTGC)2*	15	207	221		7	c*	(TTGCTT)2(TTTGC)2*	15	213	227		5	c*	(TTGCTT)2(TTTGC)2*	15	165	179
9	p1	(A)14	14	348	361		9	p1	(A)13	13	348	360		8	p1	(A)14	14	354	367		6	p1	(A)12	12	306	317
10	p6	(GAGATA)2	12	401	412		10	p6	(GAGATA)2	12	400	411		9	p6	(GAGATA)2	12	407	418		7	p6	(GAGATA)2	12	357	368
11	p5	(ATCTT)2	10	423	432		11	p5	(ATCTT)2	10	422	431		10	p5	(ATCTT)2	10	429	438		8	p5	(ATCTT)2	10	379	388
12	p5	(ACTTC)2	10	535	544		12	p5	(ACTTC)2	10	534	543		11	p5	(ACTTC)2	10	541	550		9	p5	(ACTTC)2	10	491	500
13	p5	(ATATC)2	10	559	568		13	p5	(ATATC)2	10	558	567		12	p5	(ATATC)2	10	565	574		10	p5	(ATATC)2	10	515	524
14	p5	(GGGTA)2	10	786	795		14	p5	(GGGTA)2	10	785	794		13	p5	(GGGTA)2	10	792	801		11	p5	(GGGTA)2	10	742	751
15	p5	(TACGA)2	10	797	806		15	p5	(TACGA)2	10	796	805		14	p5	(TACGA)2	10	803	812		12	p5	(TACGA)2	10	753	762
16	p5	(GATAT)2	10	994	1003		16	p5	(GATAT)2	10	993	1002		15	p5	(GATAT)2	10	1000	1009		13	p5	(GATAT)2	10	950	959
17	p6	(TATAAG)2	12	1008	1019		17	p6	(TATAAG)2	12	1007	1018		16	p6	(TATAAG)2	12	1014	1025		14	p6	(TATAAG)2	12	964	975
18	p6	(TATTTA)2	12	1060	1071		18	p6	(TATTTA)2	12	1059	1070		17	p6	(TATTTA)2	12	1066	1077		15	p6	(TATTTA)2	12	1016	1027
19	p5	(AAAGG)2	10	1142	1151		19	p5	(AAAGG)2	10	1141	1150		18	p5	(AAAGG)2	10	1148	1157		16	p5	(AAAGG)2	10	1098	1107
20	p6	(ATCCAT)2	12	1259	1270		20	p6	(ATCCAT)2	12	1258	1269		19	p6	(ATCCAT)2	12	1265	1276		17	p6	(ATCCAT)2	12	1215	1226
21	p5	(AGTAT)2	10	1284	1293		21	p5	(AGTAT)2	10	1283	1292		20	p5	(AGTAT)2	10	1290	1299		18	p5	(AGTAT)2	10	1240	1249
22	p6	(ATTTTC)2	12	1323	1334		22	p6	(ATTTTC)2	12	1322	1333		21	p6	(ATTTTC)2	12	1329	1340		19	p6	(ATTTTC)2	12	1279	1290
23	p5	(AATAG)2	10	1738	1747		23	p5	(AATAG)2	10	1737	1746		22	p5	(AATAG)2	10	1744	1753		20	p5	(AATAG)2	10	1694	1703
24	p6	(CGACAG)2	12	1827	1838		24	p6	(CGACAG)2	12	1826	1837		23	p6	(CGACAG)2	12	1833	1844		21	p6	(CGACAG)2	12	1783	1794
25	c*	(TATATT)2(TATTT)2*	18	1921	1938		25	c*	(TATATT)2(TATTT)2*	18	1920	1937		24	c*	(TATATT)2(TATTT)2*	18	1927	1944		22	c*	(TATATT)2(TATTT)2*	18	1877	1894
26	p5	(TTTAT)2	10	1944	1953		26	p5	(TTTAT)2	10	1943	1952		25	p5	(TTTAT)2	10	1950	1959		23	p5	(TTTAT)2	10	1900	1909
27	p5	(TAACA)2	10	1982	1991		27	p5	(TAACA)2	10	1981	1990		26	p5	(TAACA)2	10	1988	1997		24	p5	(TAACA)2	10	1938	1947
28	c	(A)10(CTTCG)2	20	2108	2127		28	c	(A)10(CTTCG)2	20	2107	2126		27	c	(A)10(CTTCG)2	20	2114	2133		25	c	(A)10(CTTCG)2	20	2064	2083
29	p6	(ATTCCA)2	12	2695	2706		29	p6	(ATTCCA)2	12	2694	2705		28	p6	(ATTCCA)2	12	2701	2712		26	p6	(ATTCCA)2	12	2651	2662
30	p5	(AAATG)2	10	2713	2722		30	p5	(AAATG)2	10	2712	2721		29	p5	(AAATG)2	10	2719	2728		27	p5	(AAATG)2	10	2669	2678
31	p5	(TTATT)2	10	2797	2806		31	p5	(TTATT)2	10	2796	2805		30	p5	(TTATT)2	10	2803	2812		28	p5	(TTATT)2	10	2753	2762
32	p5	(TTATT)2	10	2809	2818		32	p5	(TTATT)2	10	2808	2817		31	p5	(TTATT)2	10	2815	2824		29	p5	(TTATT)2	10	2765	2774
33	p5	(ATGTA)2	10	2880	2889		33	p5	(ATGTA)2	10	2879	2888		32	p5	(ATGTA)2	10	2886	2895		30	p5	(ATGTA)2	10	2836	2845
34	p5	(CATGA)2	10	3002	3011		34	p5	(CATGA)2	10	3001	3010		33	p5	(CATGA)2	10	3008	3017		31	p5	(CATGA)2	10	2958	2967
35	p6	(CTATGT)2	12	3110	3121		35	p6	(CTATGT)2	12	3109	3120		34	p6	(CTATGT)2	12	3116	3127		32	p6	(CTATGT)2	12	3066	3077
36	p1	(A)11	11	3197	3207		36	p1	(A)11	11	3196	3206		35	p1	(A)11	11	3203	3213		33	p1	(A)10	10	3153	3162
37	p5	(AAATA)2	10	3266	3275		37	p5	(AAATA)2	10	3265	3274		36	p5	(AAATA)2	10	3272	3281		34	p5	(AAATA)2	10	3221	3230
38	p5	(CTTAT)2	10	3326	3335		38	p5	(CTTAT)2	10	3325	3334		37	p5	(CTTAT)2	10	3332	3341		35	p5	(CTTAT)2	10	3281	3290
39	p5	(ATTAT)2	10	3337	3346		39	c*	(ATTAT)2(ATTATA)2*	17	3336	3352		38	p5	(ATTAT)2	10	3343	3352		36	p5	(ATTAT)2	10	3292	3301
40	p6	(AATTAT)3	18	3360	3377		40	p6	(AATTAT)3	18	3365	3382		39	p6	(AATTAT)3	18	3366	3383		37	p6	(AATTAT)2	12	3322	3333
41	p5	(AAAAT)2	10	3379	3388		41	p5	(AAAAT)2	10	3384	3393		40	p5	(AAAAT)2	10	3385	3394		38	p5	(AAAAT)2	10	3335	3344
42	c*	(TATTTT)2(TTTTA)2*	13	3502	3514		42	c*	(TATTTT)2(TTTTA)2*	13	3507	3519		41	c*	(TATTTT)2(TTTTA)2*	13	3508	3520		39	c*	(TATTTT)2(TTTTA)2*	13	3458	3470
43	p6	(CTCTAT)2	12	3686	3697		43	p6	(CTCTAT)2	12	3691	3702		42	p6	(CTCTAT)2	12	3692	3703		40	p6	(CTCTAT)2	12	3642	3653
44	p5	(CCAAT)2	10	3797	3806		44	p5	(CCAAT)2	10	3802	3811		43	p5	(CCAAT)2	10	3803	3812		41	p5	(CCAAT)2	10	3753	3762
45	c*	(TTTA)3(TATTTA)2*	18	4233	4250		45	c*	(TTTA)3(TATTTA)2*	18	4238	4255		44	c*	(TTTA)3(TATTTA)2*	18	4239	4256		42	c*	(TTTA)3(TATTTA)2*	18	4189	4206
46	p6	(TTTTTG)2	12	4253	4264		46	p6	(TTTTTG)2	12	4258	4269		45	p6	(TTTTTG)2	12	4259	4270		43	p6	(TTTTTG)2	12	4209	4220
47	p5	(ATTTG)2	10	4291	4300		47	p5	(ATTTG)2	10	4296	4305		46	p5	(ATTTG)2	10	4297	4306		44	p5	(ATTTG)2	10	4247	4256
48	p5	(ATTGA)2	10	4445	4454		48	p5	(ATTGA)2	10	4450	4459		47	p5	(ATTGA)2	10	4451	4460		45	p5	(ATTGA)2	10	4401	4410
49	p1	(A)14	14	4460	4473		49	p1	(A)14	14	4465	4478		48	p1	(A)15	15	4466	4480		46	p1	(A)13	13	4416	4428
50	p5	(AAAAT)2	10	4593	4602		50	p5	(AAAAT)2	10	4598	4607		49	p5	(AAAAT)2	10	4600	4609		47	p5	(AAAAT)2	10	4548	4557
51	p6	(ACTAAT)2	12	4612	4623		51	p6	(ACTAAT)2	12	4617	4628		50	p6	(ACTAAT)2	12	4619	4630		48	p6	(ACTAAT)2	12	4567	4578
52	p6	(TTTCAA)2	12	4664	4675		52	p6	(TTTCAA)2	12	4669	4680		51	p6	(TTTCAA)2	12	4671	4682		49	p6	(TTTCAA)2	12	4619	4630
53	p5	(TATCT)2	10	4755	4764		53	p5	(TATCT)2	10	4760	4769		52	p5	(TATCT)2	10	4762	4771		50	p5	(TATCT)2	10	4710	4719
54	p5	(ATAGA)2	10	4780	4789		54	p5	(ATAGA)2	10	4785	4794		53	p5	(ATAGA)2	10	4787	4796		51	p5	(ATAGA)2	10	4735	4744
55	p5	(TTCTC)2	10	5066	5075		55	p5	(TTCTC)2	10	5071	5080		54	p5	(TTCTC)2	10	5073	5082		52	p5	(TTCTC)2	10	5003	5012
56	p5	(TAAGT)2	10	5111	5120		56	p5	(TAAGT)2	10	5116	5125		55	p5	(TAAGT)2	10	5118	5127		53	p5	(TAAGT)2	10	5048	5057
57	p5	(TAAAA)2	10	5123	5132		57	p5	(TAAAA)2	10	5128	5137		56	p5	(TAAAA)2	10	5130	5139		54	p5	(TAAAA)2	10	5060	5069
58	p5	(TACTG)2	10	5143	5152		58	p5	(TACTG)2	10	5148	5157									55	p5	(TACTG)2	10	5080	5089
59	c*	(CATAA)2(CATAAT)2*	17	5238	5254		59	c*	(CATAA)2(CATAAT)2*	17	5243	5259		57	c*	(CATAA)2(CATAAT)2*	17	5245	5261		56	c*	(CATAA)2(CATAAT)2*	17	5175	5191
60	p5	(TTCTA)2	10	5279	5288		60	p5	(TTCTA)2	10	5284	5293		58	p5	(TTCTA)2	10	5286	5295		57	p5	(TTCTA)2	10	5216	5225
61	p5	(CATAA)2	10	5299	5308		61	p5	(CATAA)2	10	5304	5313		59	p5	(CATAA)2	10	5306	5315		58	p5	(CATAA)2	10	5236	5245
62	p5	(TTAAT)3	15	5346	5360		62	p5	(TTAAT)3	15	5351	5365		60	p5	(TTAAT)3	15	5353	5367		59	p5	(TTAAT)3	15	5283	5297
63	p5	(TTTTA)2	10	9266	9275		63	p5	(TTTTA)2	10	9271	9280		61	p5	(TTTTA)2	10	9273	9282		60	p5	(TTTTA)2	10	9203	9212
64	p5	(AGATA)2	10	9433	9442		64	p5	(AGATA)2	10	9438	9447		62	p5	(AGATA)2	10	9440	9449		61	p5	(AGATA)2	10	9370	9379
														63	p1	(A)10	10	9477	9486
65	p5	(CCATT)2	10	9497	9506		65	p5	(CCATT)2	10	9502	9511		64	p5	(CCATT)2	10	9505	9514		62	p5	(CCATT)2	10	9434	9443
66	c*	(CCTTTA)2(TTTAA)2*	18	9687	9704		66	c*	(CCTTTA)2(TTTAA)2*	18	9692	9709		65	c*	(CCTTTA)2(TTTAA)2*	18	9695	9712		63	c*	(CCTTTA)2(TTTAA)2*	18	9624	9641
67	p1	(T)14	14	9900	9913		67	p1	(T)13	13	9905	9917		66	p1	(T)13	13	9908	9920		64	p1	(T)11	11	9837	9847
																					65	p6	(TTTTGC)2	12	9921	9932
68	p6	(TTACGA)2	12	10027	10038		68	p6	(TTACGA)2	12	10031	10042		67	p6	(TTACGA)2	12	10034	10045		66	p6	(TTACGA)2	12	9961	9972
69	p5	(TGGAA)2	10	10205	10214		69	p5	(TGGAA)2	10	10209	10218		68	p5	(TGGAA)2	10	10212	10221		67	p5	(TGGAA)2	10	10139	10148
70	p5	(TAAGT)2	10	11602	11611		70	p5	(TAAGT)2	10	11606	11615		69	p5	(TAAGT)2	10	11609	11618		68	p5	(TAAGT)2	10	11536	11545
71	p5	(AGGAA)2	10	11694	11703		71	p5	(AGGAA)2	10	11698	11707		70	p5	(AGGAA)2	10	11701	11710		69	p5	(AGGAA)2	10	11628	11637
72	p6	(ATTTTA)2	12	12112	12123		72	p6	(ATTTTA)2	12	12116	12127		71	p6	(ATTTTA)2	12	12119	12130		70	p6	(ATTTTA)2	12	12046	12057
73	p2	(AT)5	10	12517	12526		73	p2	(AT)5	10	12521	12530		72	p2	(AT)5	10	12524	12533		71	p2	(AT)5	10	12451	12460
74	p5	(TTATG)2	10	12660	12669		74	p5	(TTATG)2	10	12664	12673		73	p5	(TTATG)2	10	12667	12676		72	p5	(TTATG)2	10	12594	12603
75	p6	(ACACGT)2	12	12870	12881		75	p6	(ACACGT)2	12	12874	12885		74	p6	(ACACGT)2	12	12877	12888		73	p6	(ACACGT)2	12	12804	12815
76	p6	(GATCAA)2	12	13242	13253		76	p6	(GATCAA)2	12	13246	13257		75	p6	(GATCAA)2	12	13249	13260		74	p6	(GATCAA)2	12	13176	13187
77	p5	(CATTC)2	10	13490	13499		77	p5	(CATTC)2	10	13494	13503		76	p5	(CATTC)2	10	13497	13506		75	p5	(CATTC)2	10	13424	13433
78	p1	(A)11	11	13889	13899		78	p1	(A)11	11	13893	13903		77	p1	(A)11	11	13896	13906		76	p1	(A)11	11	13823	13833
79	p5	(CAACA)2	10	15741	15750		79	p5	(CAACA)2	10	15745	15754		78	p5	(CAACA)2	10	15748	15757		77	p5	(CAACA)2	10	15675	15684
80	p5	(TTCTT)2	10	15911	15920		80	p5	(TTCTT)2	10	15915	15924		79	p5	(TTCTT)2	10	15918	15927		78	p5	(TTCTT)2	10	15845	15854
81	p5	(AATAA)2	10	16823	16832		81	p5	(AATAA)2	10	16827	16836		80	p5	(AATAA)2	10	16830	16839		79	p5	(AATAA)2	10	16757	16766
82	p5	(TTGGT)2	10	16941	16950		82	p5	(TTGGT)2	10	16945	16954		81	p5	(TTGGT)2	10	16948	16957		80	p5	(TTGGT)2	10	16875	16884
83	p5	(ATTAA)2	10	16965	16974		83	p5	(ATTAA)2	10	16969	16978		82	p5	(ATTAA)2	10	16972	16981		81	p5	(ATTAA)2	10	16899	16908
84	p6	(GCTTTA)2	12	17482	17493		84	p6	(GCTTTA)2	12	17479	17490		83	p6	(GCTTTA)2	12	17489	17500		82	p6	(GCTTTA)2	12	17409	17420
85	p1	(T)13	13	17830	17842		85	p1	(T)13	13	17827	17839		84	p1	(T)14	14	17837	17850		83	p1	(T)12	12	17757	17768
86	p5	(ATTAG)2	10	17948	17957		86	p5	(ATTAG)2	10	17945	17954		85	p5	(ATTAG)2	10	17956	17965
87	p1	(A)10	10	17966	17975		87	p1	(A)10	10	17963	17972		86	p1	(A)10	10	17974	17983		84	p1	(A)10	10	17892	17901
88	p5	(ATATT)3	15	18054	18068		88	p5	(ATATT)3	15	18061	18075		87	p5	(ATATT)3	15	18062	18076		85	p5	(ATATT)3	15	17980	17994
89	p5	(CCATT)2	10	18177	18186		89	p5	(CCATT)2	10	18184	18193		88	p5	(CCATT)2	10	18185	18194		86	p5	(CCATT)2	10	18103	18112
90	p6	(ATCTTT)2	12	18252	18263		90	p6	(ATCTTT)2	12	18259	18270		89	p6	(ATCTTT)2	12	18260	18271		87	p6	(ATCTTT)2	12	18178	18189
91	p5	(GAAGA)2	10	18342	18351		91	p5	(GAAGA)2	10	18349	18358		90	p5	(GAAGA)2	10	18350	18359		88	p5	(GAAGA)2	10	18268	18277
92	c*	(CAAAT)2(CAAATA)2*	17	18361	18377		92	c*	(CAAAT)2(CAAATA)2*	17	18368	18384		91	c*	(CAAAT)2(CAAATA)2*	17	18369	18385		89	c*	(CAAAT)2(CAAATA)2*	17	18287	18303
93	c	(TCAATA)2(TAAGG)2	22	18482	18503		93	c	(TCAATA)2(TAAGG)2	22	18489	18510		92	c	(TCAATA)2(TAAGG)2	22	18490	18511		90	c*	(TCAATA)2(TAAGG)2(GGTAAG)2*	27	18408	18434
94	p6	(ATATAA)2	12	18606	18617		94	p6	(ATATAA)2	12	18613	18624		93	p6	(ATATAA)2	12	18614	18625		91	p6	(ATATAA)2	12	18538	18549
95	p5	(TATTA)2	10	18628	18637		95	p5	(TATTA)2	10	18635	18644		94	p5	(TATTA)2	10	18636	18645		92	p5	(TATTA)2	10	18560	18569
96	p5	(TTTCC)2	10	18649	18658		96	p5	(TTTCC)2	10	18656	18665		95	p5	(TTTCC)2	10	18657	18666		93	p5	(TTTCC)2	10	18581	18590
97	p5	(AGAAG)2	10	18752	18761		97	p5	(AGAAG)2	10	18759	18768		96	p5	(AGAAG)2	10	18760	18769		94	p5	(AGAAG)2	10	18684	18693
98	p6	(AAGACT)2	12	18833	18844		98	p6	(AAGACT)2	12	18840	18851		97	p6	(AAGACT)2	12	18841	18852		95	p6	(AAGACT)2	12	18765	18776
99	c*	(CTATAA)2(TAAAT)2*	19	19265	19283		99	c*	(CTATAA)2(TAAAT)2*	19	19272	19290		98	c*	(CTATAA)2(TAAAT)2*	19	19273	19291		96	c*	(CTATAA)2(TAAAT)2*	19	19197	19215
100	c*	(AAAAAT)3(AAAT)4*	30	19289	19318		100	c*	(AAAAAT)3(AAAT)4*	30	19296	19325		99	c*	(AAAAAT)3(AAAT)4*	30	19297	19326		97	c*	(AAAAAT)2(AAAT)4*	24	19221	19244
101	c*	(TTATA)3(ATTATA)2*(ATTAT)2*	25	19334	19358		101	c*	(TTATA)3(ATTATA)2*(ATTAT)2*	25	19341	19365		100	c*	(TTATA)3(ATTATA)2*(ATTAT)2*	25	19342	19366		98	c*	(TTATA)3(ATTATA)2*(ATTAT)2*	25	19260	19284
102	p5	(ATATT)2	10	19371	19380		102	p5	(ATATT)2	10	19378	19387		101	p5	(ATATT)2	10	19379	19388		99	p5	(ATATT)2	10	19297	19306
103	c*	(ATATAA)3(AATAT)2*(ATAAT)2	31	19389	19419		103	c*	(ATATAA)3(AATAT)2*(ATAAT)2	31	19396	19426		102	c*	(ATATAA)3(AATAT)2*(ATAAT)2	31	19397	19427		100	c*	(ATATAA)3(AATAT)2*	21	19315	19335
104	c	(ATATA)3(TAATA)3(AATAT)2(AGAAT)2	50	19430	19479		104	c	(ATATA)3(TAATA)3(AATAT)2(AGAAT)2	50	19437	19486		103	c	(ATATA)3(TAATA)3(AATAT)2(AGAAT)2	50	19438	19487
																					101	p5	(ATATA)2	10	19341	19350
																					102	p5	(AATAT)2	10	19354	19363
																					103	c*	(AAATAT)2(AATAT)2*	17	19367	19383
																					104	p5	(ATATA)2	10	19389	19398
																					105	p5	(AATAT)2	10	19402	19411
																					106	p5	(ATATA)2	10	19417	19426
105	p5	(AATAG)2	10	19496	19505		105	p5	(AATAG)2	10	19495	19504		104	p5	(AATAG)2	10	19496	19505		107	p5	(AATAG)2	10	19437	19446
106	p5	(AATAG)2	10	19509	19518		106	p5	(AATAG)2	10	19516	19525		105	p5	(AATAG)2	10	19517	19526		108	p5	(AATAG)2	10	19450	19459
107	p5	(ATAAA)2	10	19561	19570		107	p5	(AATAG)2	10	19529	19538		106	p5	(AATAG)2	10	19538	19547		109	p5	(AATAG)2	10	19463	19472
							108	p5	(AATAG)2	10	19542	19551
108	p2	(AT)6	12	19586	19597		110	p2	(AT)6	12	19598	19609		108	p2	(AT)6	12	19602	19613
109	c*	(AT)7(ATATA)2*(AT)6*(ATATA)2*	33	19610	19642		111	c*	(AT)7(ATATA)2*(AT)6*(ATATA)2*	33	19622	19654		109	c*	(AT)7(ATATA)2*(AT)6*(ATATA)2*(AATATA)2*	39	19626	19664
110	p5	(ATATA)2	10	19649	19658		112	p5	(ATATA)2	10	19661	19670
111	c*	(AT)11(ATATA)2*(AATATA)2*	34	19671	19704		113	c*	(AT)11(ATATA)2*(AATATA)2*	34	19683	19716
112	p6	(ATATAA)2	12	19719	19730		114	p6	(ATATAA)2	12	19731	19742		110	p6	(ATATAA)2	12	19679	19690
113	p2	(TA)6	12	19771	19782		115	p2	(TA)6	12	19783	19794		111	p2	(TA)6	12	19731	19742
114	p5	(TATAT)2	10	19792	19801		116	p5	(TATAT)2	10	19804	19813		112	p5	(TATAT)2	10	19752	19761
115	p6	(ATATAA)3	18	19824	19841		117	p6	(ATATAA)3	18	19836	19853		113	p6	(ATATAA)3	18	19784	19801
116	c*	(ATATA)2(AT)5*(ATATA)2*	21	19865	19885		118	c*	(ATATA)2(AT)5*(ATATA)2*	21	19877	19897		114	c*	(ATATA)2(AT)5*(ATATA)2*	21	19825	19845
117	p5	(ATATA)2	10	19903	19912		119	p5	(ATATA)2	10	19915	19924		115	p5	(ATATA)2	10	19863	19872
118	c*	(ATATA)2(AT)6*	17	19933	19949		120	c*	(ATATA)2(AT)6*	17	19945	19961		116	c*	(ATATA)2(AT)6*	17	19893	19909
119	p2	(AT)6	12	19952	19963		121	p2	(AT)6	12	19964	19975		117	p2	(AT)6	12	19912	19923
120	c*	(AT)6(ATATA)2*(AT)6*(ATATA)2*(AT)5*	36	19967	20002		122	c*	(AT)6(ATATA)2*(AT)6*(ATATA)2*(AT)5*	36	19979	20014		118	c*	(AT)6(ATATA)2*(AT)6*(ATATA)2*(AT)5*	36	19927	19962
121	c*	(AT)6(ATATA)2*(AT)5*	23	20005	20027		123	c*	(AT)6(ATATA)2*(AT)5*	23	20017	20039		119	c*	(AT)6(ATATA)2*(AT)6*(ATATA)2*(AT)5*	36	19976	20011
122	c*	(ATATAA)2(AAATA)2*	20	20032	20051		124	c*	(AT)5(ATATA)2*(AT)6*(ATATA)2*(AT)5*	34	20042	20075		120	c*	(AT)5(ATATA)2*(AT)6*(ATATA)2*(AT)5*	34	20014	20047		110	c*	(AT)5(ATATA)2*(AT)6*(ATATA)2*(AT)5*	34	19482	19515
																					111	c*	(ATATAA)2(AAATA)2*	20	19520	19539
123	c	(AAATAT)2(AAATA)2	22	20057	20078		125	p2	(AT)6	12	20078	20089		121	p2	(AT)6	12	20050	20061		112	p5	(AAATA)2	10	19541	19550
124	p5	(AAATA)2	10	20080	20089		126	p5	(AAATA)2	10	20096	20105		122	p5	(AAATA)2	10	20068	20077
125	c	(AAATAT)2(AAATA)2	22	20095	20116		127	c	(AAATAT)2(AAATA)2	22	20111	20132		123	p5	(AAATA)2	10	20089	20098
																					113	c*	(ATAAAA)2(AAAAT)2*(TATAAA)2*(AAATA)2*	31	19560	19590
							128	p5	(AAATA)2	10	20134	20143		124	p5	(AAATA)2	10	20100	20109
							129	c	(AAATAT)2(AAATA)2	22	20149	20170		125	c	(AAATAT)2(AAATA)2	22	20115	20136
126	p4	(ATAA)4	16	20126	20141		130	p4	(ATAA)4	16	20180	20195		126	p4	(ATAA)4	16	20146	20161		114	p4	(ATAA)4	16	19600	19615
127	p1	(A)10	10	20159	20168		131	p1	(A)10	10	20213	20222		127	p1	(A)11	11	20179	20189		115	p1	(A)10	10	19633	19642
																					116	p1	(T)11	11	19906	19916
128	p5	(AAAAT)2	10	20820	20829		132	p5	(AAAAT)2	10	20874	20883		128	p5	(AAAAT)2	10	20841	20850		117	p5	(AAAAT)2	10	20296	20305
129	p6	(TATAAA)2	12	20848	20859		133	p6	(TATAAA)2	12	20902	20913		129	p6	(TATAAA)2	12	20869	20880		118	p6	(TATAAA)2	12	20331	20342
130	p5	(AAACA)2	10	20869	20878		134	p5	(AAACA)2	10	20923	20932		130	p5	(AAACA)2	10	20890	20899		119	p5	(AAACA)2	10	20352	20361
131	p5	(AGAGA)2	10	20972	20981		135	p5	(AGAGA)2	10	21026	21035		131	p5	(AGAGA)2	10	20993	21002		120	p5	(AGAGA)2	10	20455	20464
132	p5	(CATTA)2	10	20991	21000		136	p5	(CATTA)2	10	21045	21054		132	p5	(CATTA)2	10	21012	21021		121	p5	(CATTA)2	10	20474	20483
133	p5	(AAGTT)2	10	21090	21099		137	p5	(AAGTT)2	10	21144	21153		133	p5	(GAAGT)2	10	21110	21119		122	p5	(AAGTT)2	10	20573	20582
134	p1	(T)12	12	21563	21574		138	p1	(T)12	12	21617	21628		134	p1	(T)12	12	21584	21595		123	p1	(T)12	12	21046	21057
135	p6	(ACAAGC)2	12	22407	22418		139	p6	(ACAAGC)2	12	22461	22472		135	p6	(ACAAGC)2	12	22428	22439		124	p6	(ACAAGC)2	12	21890	21901
136	p5	(GAAAT)2	10	23220	23229		140	p5	(GAAAT)2	10	23274	23283		136	p5	(GAAAT)2	10	23241	23250		125	p5	(GAAAT)2	10	22703	22712
137	p5	(TTCCT)2	10	23364	23373		141	p5	(TTCCT)2	10	23418	23427		137	p5	(TTCCT)2	10	23385	23394		126	p5	(TTCCT)2	10	22847	22856
138	p1	(A)10	10	23657	23666		142	p1	(A)10	10	23711	23720		138	p1	(A)10	10	23678	23687		127	p1	(A)13	13	23140	23152
139	p1	(A)14	14	23917	23930		143	p1	(A)14	14	23971	23984		139	p1	(A)14	14	23938	23951		128	p1	(A)14	14	23403	23416
140	p1	(A)11	11	24033	24043		144	p1	(A)12	12	24087	24098		140	p1	(A)12	12	24054	24065		129	p1	(A)12	12	23519	23530
141	p5	(TTAGA)4	20	24096	24115		145	p5	(TTAGA)4	20	24151	24170		141	p5	(TTAGA)4	20	24118	24137		130	p5	(TTAGA)4	20	23583	23602
142	p6	(GAACAA)2	12	24325	24336		146	p6	(GAACAA)2	12	24380	24391		142	p6	(GAACAA)2	12	24347	24358		131	p6	(GAACAA)2	12	23812	23823
143	p5	(ATTTA)2	10	24451	24460		147	p5	(ATTTA)2	10	24506	24515		143	p5	(ATTTA)2	10	24473	24482		132	p5	(ATTTA)2	10	23938	23947
144	p5	(ATTTA)2	10	24473	24482		148	p5	(ATTTA)2	10	24528	24537		144	p5	(ATTTA)2	10	24533	24542		133	p5	(ATTTA)2	10	23998	24007
145	p5	(ATTTA)2	10	24533	24542		149	p5	(ATTTA)2	10	24588	24597		145	p5	(TTTAA)2	10	24553	24562		134	p5	(TTTAA)2	10	24018	24027
																					135	p5	(TATTT)2	10	24031	24040
																					136	p5	(TTTAA)2	10	24047	24056
146	c*	(TATAT)2(TA)5*	15	24587	24601		150	c*	(TATAT)2(TA)5*	15	24642	24656		146	c*	(TATAT)2(TA)5*	15	24587	24601		137	c*	(TATAT)2(TA)5*	15	24081	24095
147	p5	(TATAT)2	10	24617	24626		151	p5	(TATAT)2	10	24672	24681		147	p5	(TATAT)2	10	24617	24626		138	p5	(TATAT)2	10	24100	24109
																					139	p5	(ATATT)2	10	24135	24144
148	p6	(ATATAA)2	12	24682	24693		152	p6	(ATATAA)2	12	24737	24748		148	p6	(ATATAA)2	12	24682	24693		140	p6	(ATATAA)2	12	24196	24207
																					141	p5	(TATAA)2	10	24220	24229
																					142	c*	(TA)6(TATAT)2*	18	24241	24258
149	p5	(TATAT)2	10	24730	24739		153	p5	(TATAT)2	10	24785	24794		149	p5	(TATAT)2	10	24730	24739		143	p5	(TATAT)2	10	24274	24283
150	p5	(TATAT)2	10	24746	24755		154	p5	(TATAT)2	10	24801	24810		150	p5	(TATAT)2	10	24746	24755		144	p5	(TATAT)2	10	24290	24299
151	p5	(TATAT)2	10	24762	24771		155	p5	(TATAT)2	10	24817	24826		151	p5	(TATAT)2	10	24762	24771		145	p5	(TATAT)2	10	24380	24389
							156	p2	(TA)5	10	24838	24847
152	p5	(TATAT)2	10	24852	24861		157	p5	(TATAT)2	10	24920	24929		152	p5	(TATAT)2	10	24852	24861		146	p5	(TATAT)2	10	24395	24404
153	p5	(TATAT)2	10	24867	24876		158	p5	(TATAT)2	10	24935	24944		153	p5	(TATAT)2	10	24867	24876
154	p6	(TATAAA)2	12	24899	24910		159	p6	(TATAAA)2	12	24967	24978		154	p6	(TATAAA)2	12	24899	24910		147	p6	(TATAAA)2	12	24409	24420
155	p2	(AT)5	10	24928	24937		160	p2	(AT)5	10	24996	25005		155	p2	(AT)5	10	24928	24937		148	p6	(TATAAA)2	12	24431	24442
156	p6	(AATTCT)2	12	24954	24965		161	p5	(ATTAT)2	10	25029	25038		156	c*	(AATTAT)3(ATTAT)2*	23	24948	24970		149	p6	(TATAAA)2	12	24453	24464
157	p5	(TATTA)2	10	24977	24986		162	p5	(TATTA)2	10	25045	25054		157	p5	(TATTA)2	10	24977	24986		150	c*	(AATTAT)3(ATTAT)2*	23	24489	24511
158	c	(ATTAT)2(TTATA)2	20	24992	25011		163	c	(ATTAT)2(TTATA)2	20	25060	25079		158	c	(ATTAT)2(TTATA)2	20	24992	25011		151	p5	(TATTA)2	10	24518	24527
159	p5	(TATAT)2	10	25131	25140		164	p5	(TATAT)2	10	25192	25201		159	p5	(TATAT)2	10	25124	25133		152	p5	(TTATA)2	10	24543	24552
																					153	c	(TATAT)2(ATATT)2	20	24656	24675
160	c*	(TA)5(ATATA)2*(AT)13*	36	25143	25178		165	c*	(TA)5(ATATA)2*(AT)13*	36	25204	25239		160	c*	(TA)5(ATATA)2*(AT)13*	36	25136	25171		154	c*	(TA)5(ATATA)2*(AT)13*	36	24677	24712
161	c*	(TA)5(ATAGA)2*	17	25181	25197		166	c*	(TA)5(ATAGA)2*	17	25242	25258		161	c*	(TA)5(ATAGA)2*	17	25174	25190		155	c*	(TA)5(ATAGA)2*	17	24715	24731
162	c*	(TA)5(ATAGA)2*	17	25242	25258		167	c*	(TA)5(ATAGA)2*	17	25303	25319		162	c*	(TA)5(ATAGA)2*	17	25235	25251		156	c*	(TA)5(ATAGA)2*(ATAGAT)2*	24	24776	24799
																					157	p5	(ATAGA)2	10	24824	24833
163	p6	(TAAATC)2	12	25534	25545		168	p6	(TAAATC)2	12	25595	25606		163	p6	(TAAATC)2	12	25527	25538		158	p6	(TAAATC)2	12	25109	25120
164	p6	(AAAATA)2	12	25569	25580		169	p6	(AAAATA)2	12	25630	25641		164	p6	(AAAATA)2	12	25562	25573		159	p6	(AAAATA)2	12	25144	25155
165	p5	(TAAAA)2	10	25598	25607		170	p5	(TAAAA)2	10	25659	25668		165	p5	(TAAAA)2	10	25591	25600		160	p5	(TAAAA)2	10	25173	25182
166	p5	(AAGAA)2	10	25823	25832		171	p5	(AAGAA)2	10	25884	25893		166	p5	(AAGAA)2	10	25816	25825		161	p5	(AAGAA)2	10	25398	25407
167	p5	(TACCA)2	10	25925	25934		172	p5	(TACCA)2	10	25986	25995		167	p5	(TACCA)2	10	25918	25927		162	p5	(TACCA)2	10	25500	25509
168	p1	(T)10	10	26103	26112		173	p1	(T)10	10	26164	26173		168	p1	(T)10	10	26096	26105		163	p1	(T)10	10	25678	25687
169	p5	(ACAGT)2	10	26138	26147		174	p5	(ACAGT)2	10	26199	26208		169	p5	(ACAGT)2	10	26131	26140		164	p5	(ACAGT)2	10	25713	25722
170	p5	(GATTG)2	10	26236	26245		175	p5	(GATTG)2	10	26297	26306		170	p5	(GATTG)2	10	26229	26238		165	p5	(GATTG)2	10	25811	25820
171	p6	(ACAGAT)2	12	26311	26322		176	p6	(ACAGAT)2	12	26372	26383		171	p6	(ACAGAT)2	12	26304	26315		166	p6	(ACAGAT)2	12	25886	25897
172	p5	(TAATT)2	10	26367	26376		177	p5	(TAATT)2	10	26428	26437		172	p5	(TAATT)2	10	26360	26369		167	p5	(TAATT)2	10	25942	25951
173	c	(AAGAA)2(AGAAG)2	20	26401	26420		178	c	(AAGAA)2(AGAAG)2	20	26462	26481		173	c	(AAGAA)2(AGAAG)2	20	26394	26413		168	c	(AAGAA)2(AGAAG)2	20	25976	25995
174	p6	(TTCTTT)2	12	26437	26448		179	p6	(TTCTTT)2	12	26498	26509		174	p6	(TTCTTT)2	12	26430	26441		169	p6	(TTCTTT)2	12	26012	26023
																					170	p6	(TTTATT)2	12	26124	26135
175	p5	(ATCCA)2	10	26620	26629		180	p5	(ATCCA)2	10	26681	26690		175	p5	(ATCCA)2	10	26613	26622		171	p5	(ATCCA)2	10	26195	26204
176	p6	(AATGTG)2	12	26817	26828		181	p6	(AATGTG)2	12	26878	26889		176	p6	(AATGTG)2	12	26810	26821		172	p6	(AATGTG)2	12	26392	26403
177	p1	(T)21	21	26949	26969		182	p1	(T)16	16	27010	27025		177	p1	(T)16	16	26942	26957		173	p1	(T)18	18	26524	26541
178	p6	(ATTCAT)2	12	27045	27056		183	p6	(ATTCAT)2	12	27101	27112		178	p6	(ATTCAT)2	12	27033	27044		174	p6	(ATTCAT)2	12	26617	26628
179	p5	(AATAG)2	10	27183	27192		184	p5	(AATAG)2	10	27239	27248		179	p5	(AATAG)2	10	27171	27180		175	p5	(AATAG)2	10	26755	26764
180	p1	(G)10	10	27301	27310		185	p1	(G)10	10	27357	27366		180	p1	(G)10	10	27289	27298		176	p1	(G)10	10	26873	26882
181	p5	(TGATG)2	10	27337	27346		186	p5	(TGATG)2	10	27393	27402		181	p5	(TGATG)2	10	27325	27334		177	p5	(TGATG)2	10	26909	26918
182	p5	(TAAAG)2	10	27372	27381		187	p5	(TAAAG)2	10	27428	27437		182	p5	(TAAAG)2	10	27360	27369		178	p5	(TAAAG)2	10	26944	26953
183	p6	(TATTGT)2	12	27417	27428		188	p6	(TATTGT)2	12	27473	27484		183	p6	(TATTGT)2	12	27405	27416		179	p6	(TATTGT)2	12	26989	27000
184	p5	(TTGGC)2	10	27504	27513		189	p5	(TTGGC)2	10	27560	27569		184	p5	(TTGGC)2	10	27492	27501		180	p5	(TTGGC)2	10	27076	27085
185	p6	(ATATAC)2	12	27560	27571		190	p6	(ATATAC)2	12	27616	27627		185	p6	(ATATAC)2	12	27548	27559		181	p6	(ATATAC)2	12	27132	27143
186	p5	(ATCTT)2	10	27628	27637		191	p5	(ATCTT)2	10	27684	27693		186	p5	(ATCTT)2	10	27616	27625		182	p5	(ATCTT)2	10	27200	27209
187	p5	(CCCAT)2	10	27655	27664		192	p5	(CCCAT)2	10	27711	27720		187	p5	(CCCAT)2	10	27643	27652		183	p5	(CCCAT)2	10	27227	27236
188	p1	(T)11	11	27693	27703		193	p1	(T)11	11	27749	27759		188	p1	(T)11	11	27681	27691		184	p1	(T)10	10	27265	27274
189	p6	(TCTTTA)2	12	27789	27800		194	p6	(TCTTTA)2	12	27845	27856		189	p6	(TCTTTA)2	12	27777	27788		185	p6	(TCTTTA)2	12	27360	27371
190	p5	(TTAGT)2	10	28058	28067		195	p5	(TTAGT)2	10	28114	28123		190	p5	(TTAGT)2	10	28046	28055		186	p5	(TTAGT)2	10	27629	27638
191	p5	(AAATG)2	10	28173	28182		196	p5	(AAATG)2	10	28229	28238		191	p5	(AAATG)2	10	28161	28170		187	p5	(AAATG)2	10	27744	27753
192	p5	(TGTTC)2	10	28490	28499		197	p5	(TGTTC)2	10	28546	28555		192	p5	(TGTTC)2	10	28478	28487		188	p5	(TGTTC)2	10	28061	28070
193	p5	(AGTAT)2	10	28546	28555		198	p5	(AGTAT)2	10	28602	28611		193	p5	(AGTAT)2	10	28534	28543		189	p5	(AGTAT)2	10	28117	28126
194	p5	(GAAAG)2	10	28651	28660		199	p5	(GAAAG)2	10	28707	28716		194	p5	(GAAAG)2	10	28639	28648		190	p5	(GAAAG)2	10	28222	28231
195	p5	(CAAAG)2	10	28853	28862		200	p5	(CAAAG)2	10	28909	28918		195	p5	(CAAAG)2	10	28841	28850		191	p5	(CAAAG)2	10	28424	28433
196	p6	(AACTAG)2	12	28910	28921		201	p6	(AACTAG)2	12	28966	28977		196	p6	(AACTAG)2	12	28898	28909		192	p6	(AACTAG)2	12	28481	28492
197	p1	(T)11	11	29054	29064		202	p1	(T)12	12	29110	29121		197	p1	(T)12	12	29042	29053		193	p1	(T)11	11	28625	28635
198	p6	(CATCTA)2	12	29225	29236		203	p6	(CATCTA)2	12	29282	29293		198	p6	(CATCTA)2	12	29214	29225		194	p6	(CATCTA)2	12	28796	28807
199	p5	(TCTTA)2	10	29577	29586		204	p5	(TCTTA)2	10	29634	29643		199	p5	(TCTTA)2	10	29566	29575		195	p5	(TCTTA)2	10	29148	29157
200	p1	(T)11	11	29666	29676		205	p1	(T)11	11	29723	29733		200	p1	(T)11	11	29655	29665		196	p1	(T)11	11	29237	29247
201	p5	(CATCA)2	10	29780	29789		206	p5	(CATCA)2	10	29837	29846		201	p5	(CATCA)2	10	29769	29778		197	p5	(CATCA)2	10	29351	29360
202	p1	(T)17	17	29847	29863		207	p1	(T)17	17	29904	29920		202	p1	(T)16	16	29836	29851		198	p1	(T)16	16	29418	29433
203	p1	(A)18	18	30066	30083		208	p1	(A)19	19	30123	30141		203	p1	(A)18	18	30054	30071		199	p1	(A)20	20	29636	29655
204	p5	(AGATC)2	10	30206	30215		209	p5	(AGATC)2	10	30264	30273		204	p5	(AGATC)2	10	30194	30203		200	p5	(AGATC)2	10	29778	29787
205	p6	(TTTTTA)3	18	30282	30299		210	p6	(TTTTTA)3	18	30340	30357		205	p6	(TTTTTA)3	18	30270	30287		201	p6	(TTTTTA)3	18	29854	29871
206	p6	(TTATTT)2	12	30319	30330		211	p6	(TTATTT)2	12	30377	30388		206	p6	(TTATTT)2	12	30307	30318		202	p6	(TTATTT)2	12	29891	29902
207	p5	(TAATT)2	10	30845	30854		212	p5	(TAATT)2	10	30903	30912		207	p5	(TAATT)2	10	30833	30842		203	p5	(TAATT)2	10	30417	30426
208	p5	(CATCT)2	10	30906	30915		213	p5	(CATCT)2	10	30964	30973		208	p5	(CATCT)2	10	30894	30903		204	p5	(CATCT)2	10	30478	30487
209	p1	(A)13	13	30927	30939		214	p1	(A)13	13	30985	30997		209	p1	(A)13	13	30915	30927		205	p1	(A)12	12	30499	30510
210	p6	(TCCCTG)2	12	30974	30985		215	p6	(TCCCTG)2	12	31032	31043		210	p6	(TCCCTG)2	12	30962	30973		206	p6	(TCCCTG)2	12	30545	30556
211	p5	(TTCTT)2	10	31001	31010		216	p5	(TTCTT)2	10	31059	31068		211	p5	(TTCTT)2	10	30989	30998		207	p5	(TTCTT)2	10	30572	30581
212	p5	(TTCTT)2	10	31012	31021		217	p5	(TTCTT)2	10	31070	31079		212	p5	(TTCTT)2	10	31000	31009		208	p5	(TTCTT)2	10	30583	30592
213	p5	(ACCCC)2	10	31577	31586		218	p5	(ACCCC)2	10	31635	31644		213	p5	(ACCCC)2	10	31565	31574		209	p5	(ACCCC)2	10	31148	31157
214	p5	(GTACG)2	10	32464	32473		219	p5	(GTACG)2	10	32522	32531		214	p5	(GTACG)2	10	32452	32461		210	p5	(GTACG)2	10	32035	32044
215	p5	(ATAAA)2	10	32694	32703		220	p5	(ATAAA)2	10	32752	32761		215	p5	(ATAAA)2	10	32682	32691		211	p5	(ATAAA)2	10	32265	32274
216	p6	(TATGTA)2	12	32739	32750		221	p6	(TATGTA)2	12	32797	32808		216	p6	(TATGTA)2	12	32727	32738		212	p6	(TATGTA)2	12	32310	32321
217	c*	(ATAGA)2(AGATAG)2*(ATAGA)2*(AGATAG)2*(ATAGA)2*(AGATAG)2*(ATAGA)2*	55	33019	33073		222	c*	(ATAGA)2(AGATAG)2*(ATAGA)2*(AGATAG)2*(ATAGA)2*(AGATAG)2*(ATAGA)2*	55	33077	33131		217	c*	(ATAGA)2(AGATAG)2*(ATAGA)2*(AGATAG)2*(ATAGA)2*(AGATAG)2*(ATAGA)2*(AGATAG)2*(ATAGA)2*	70	33007	33076		213	c*	(ATAGA)2(AGATAG)2*(ATAGA)2*	25	32570	32594
218	p2	(AT)6	12	33172	33183		223	p2	(AT)6	12	33230	33241		218	p2	(AT)6	12	33175	33186		214	p2	(AT)6	12	32706	32717
219	p6	(TATTGG)2	12	33198	33209		224	p6	(TATTGG)2	12	33256	33267		219	p6	(TATTGG)2	12	33201	33212		215	p6	(TATTGG)2	12	32732	32743
220	p5	(TCTAT)2	10	33256	33265		225	p5	(TCTAT)2	10	33314	33323		220	p5	(TCTAT)2	10	33259	33268		216	p5	(TCTAT)2	10	32790	32799
221	p6	(TTATAG)2	12	33295	33306		226	p6	(TTATAG)2	12	33353	33364		221	p6	(TTATAG)2	12	33298	33309		217	p6	(TTATAG)2	12	32829	32840
222	p6	(TTATAG)2	12	33311	33322									222	p6	(TTATAG)2	12	33314	33325		218	p6	(TTATAG)2	12	32845	32856
223	p5	(TTGAA)2	10	34485	34494		227	p5	(TTGAA)2	10	34527	34536		223	p5	(TTGAA)2	10	34488	34497		219	p5	(TTGAA)2	10	34019	34028
224	p5	(TCACA)2	10	34557	34566		228	p5	(TCACA)2	10	34599	34608		224	p5	(TCACA)2	10	34560	34569		220	p5	(TCACA)2	10	34091	34100
225	p1	(T)10	10	34573	34582		229	p1	(T)10	10	34615	34624		225	p1	(T)10	10	34576	34585
226	p6	(TTACAG)2	12	34599	34610		230	p6	(TTACAG)2	12	34641	34652		226	p6	(TTACAG)2	12	34602	34613		221	p6	(TTACAG)2	12	34132	34143
227	p6	(ATATTG)2	12	34616	34627		231	p6	(ATATTG)2	12	34658	34669		227	p6	(ATATTG)2	12	34619	34630		222	p6	(ATATTG)2	12	34149	34160
228	p5	(AAGAA)2	10	34669	34678		232	p5	(AAGAA)2	10	34711	34720		228	p5	(AAGAA)2	10	34672	34681		223	p5	(AAGAA)2	10	34202	34211
229	p6	(AATATA)2	12	34767	34778		233	p6	(AATATA)2	12	34809	34820		229	p6	(AATATA)2	12	34798	34809		224	p6	(AATATA)2	12	34300	34311
230	p5	(ATAAA)2	10	34807	34816		234	p5	(ATAAA)2	10	34849	34858		230	p5	(ATAAA)2	10	34838	34847		225	p5	(ATAAA)2	10	34340	34349
231	p5	(TAATA)2	10	34868	34877		235	p5	(TAATA)2	10	34910	34919		231	p5	(TAATA)2	10	34899	34908		226	p6	(ATTAAT)2	12	34367	34378
232	c*	(ATTAAT)2(ATAAT)2*	20	34883	34902																227	c*	(ATTA)3(ATTAT)2*	18	34380	34397
233	p5	(ATAAT)2	10	34920	34929		236	p5	(ATAAT)2	10	34929	34938		232	p5	(ATAAT)2	10	34918	34927		228	p5	(ATTAT)2	10	34400	34409
234	c*	(ATTAAT)2(ATAAT)2*	20	34965	34984		237	c*	(ATTAAT)2(ATAAT)2*	20	35001	35020
235	c*	(TTAATA)2(ATAAT)2*	19	34991	35009		238	c*	(TTAATA)2(ATAAT)2*	19	35027	35045
														233	p5	(ATAAT)2	10	34945	34954		229	p5	(ATAAT)2	10	34438	34447
														234	p5	(ATAAT)2	10	34994	35003		230	p5	(ATAAT)2	10	34450	34459
236	p5	(ATAAT)2	10	35016	35025		239	p5	(ATAAT)2	10	35052	35061		235	p5	(ATAAT)2	10	35035	35044		231	p5	(ATAAT)2	10	34469	34478
237	p5	(ATAAT)2	10	35031	35040		240	p5	(ATAAT)2	10	35067	35076		236	p5	(ATAAT)2	10	35050	35059		232	p5	(ATAAT)2	10	34518	34527
238	p5	(AATAA)2	10	35059	35068		241	p5	(AATAA)2	10	35095	35104		237	p5	(AATAA)2	10	35078	35087
239	p2	(AT)6	12	35109	35120		242	p2	(AT)6	12	35145	35156		238	p2	(AT)6	12	35128	35139
																					233	c*	(TTAATA)2(ATAAT)2*	19	34534	34552
																					234	p5	(ATAAT)2	10	34559	34568
																					235	p5	(ATAAT)2	10	34574	34583
																					236	p5	(AATAA)2	10	34602	34611
																					237	p6	(ATATAA)2	12	34654	34665
240	c*	(TAT)4(TATTA)2*	16	35191	35206		243	c*	(TAT)4(TATTA)2*	16	35227	35242		239	c*	(TAT)4(TATTA)2*	16	35210	35225		238	c*	(TAT)4(TATTA)2*	16	34741	34756
241	c*	(ATATA)2(AT)5*	15	35241	35255		244	c*	(ATATA)2(AT)5*	15	35277	35291		240	c*	(ATATA)2(AT)5*	15	35260	35274
242	p2	(AT)6	12	35307	35318		245	p2	(AT)6	12	35343	35354		241	p2	(AT)6	12	35326	35337
243	p5	(TATAT)2	10	35329	35338		246	p5	(TATAT)2	10	35365	35374		242	p5	(TATAT)2	10	35348	35357		239	p5	(TATAT)2	10	34764	34773
244	p5	(TATAT)2	10	35393	35402		247	p5	(TATAT)2	10	35429	35438		243	p5	(TATAT)2	10	35412	35421
245	p6	(AATATA)2	12	35406	35417		248	p6	(AATATA)2	12	35442	35453		244	p6	(AATATA)2	12	35425	35436
																					240	p2	(TA)6	12	34795	34806
																					241	p2	(AT)6	12	34857	34868
																					242	p6	(ATATTA)2	12	34890	34901
																					243	c*	(TATAT)2(TATATT)2*	19	34936	34954
246	p2	(TA)7	14	35426	35439		249	p2	(TA)7	14	35462	35475		245	p2	(TA)6	12	35445	35456		244	p2	(TA)6	12	34969	34980
247	p5	(ATTCT)2	10	35483	35492		250	p5	(ATTCT)2	10	35519	35528		246	p5	(ATTCT)2	10	35500	35509		245	p5	(ATTCT)2	10	35024	35033
248	p5	(TATTA)2	10	35587	35596		251	p5	(TATTA)2	10	35623	35632		247	p5	(ATTCT)2	10	35519	35528		246	p5	(ATTCT)2	10	35043	35052
														248	p5	(ATTCT)2	10	35542	35551		247	p5	(ATTCT)2	10	35089	35098
														249	p5	(ATTCT)2	10	35565	35574		248	p5	(ATTCT)2	10	35124	35133
														250	p5	(TATTA)2	10	35627	35636
249	c*	(TTATA)2(ATATTA)2*	21	35623	35643		252	c*	(TTATA)2(ATATTA)2*	21	35659	35679		251	c*	(TTATA)2(ATATTA)2*	21	35663	35683		249	c*	(TTATA)2(ATATTA)2*	21	35164	35184
250	p6	(ATATTA)2	12	35662	35673		253	p6	(ATATTA)2	12	35698	35709		252	p6	(ATATTA)2	12	35702	35713
251	p2	(TA)7	14	35676	35689		254	p2	(TA)7	14	35712	35725		253	p2	(TA)7	14	35716	35729
																					250	p6	(ATATTA)3	18	35203	35220
														254	p2	(TA)7	14	35735	35748		251	p2	(TA)7	14	35223	35236
252	p5	(TTATT)2	10	35714	35723		255	p5	(TTATT)2	10	35750	35759		255	p5	(TTATT)2	10	35773	35782		252	p5	(TTATT)2	10	35270	35279
253	p6	(TTTATT)2	12	35725	35736		256	p6	(TTTATT)2	12	35761	35772		256	p6	(TTTATT)2	12	35784	35795		253	p6	(TTTATT)2	12	35281	35292
254	c*	(TATAA)2(TATAAT)2*	17	35740	35756		257	c*	(TATAA)2(TATAAT)2*	17	35776	35792		257	c*	(TATAA)2(TATAAT)2*	17	35799	35815
255	p6	(TATAAT)2	12	35771	35782		258	p6	(TATAAT)2	12	35807	35818		258	p6	(TATAAT)2	12	35830	35841
256	c*	(ATAAT)2(TATAAT)2*(AATTAT)2(TATAA)2*(TATAAT)2*	42	35795	35836		259	c*	(ATAAT)2(TATAAT)2*(AATTAT)2(TATAA)2*(TATAAT)2*	42	35831	35872		259	c*	(ATAAT)2(TATAAT)2*(AATTAT)2(TATAA)2*(TATAAT)2*	42	35854	35895		254	c*	(TATAA)2(TATAAT)2*(TATAA)2*	21	35296	35316
																					255	p6	(TATAAT)2	12	35327	35338
																					256	c*	(ATAAT)2(TATAAT)2*	16	35351	35366
257	p5	(ATTAT)2	10	35893	35902		260	p5	(ATTAT)2	10	35929	35938		260	p5	(ATTAT)2	10	35952	35961
258	p5	(ATTAT)2	10	35905	35914		261	p5	(ATTAT)2	10	35955	35964		261	p5	(ATTAT)2	10	35964	35973		257	p5	(ATTAT)2	10	35423	35432
259	c	(ATAAA)2(TTATA)2	20	35938	35957		262	c	(ATAAA)2(TTATA)2	20	35988	36007		262	c	(ATAAA)2(TTATA)2	20	35997	36016		258	c	(ATAAA)2(TTATA)2	20	35456	35475
260	p6	(ATTTAT)3	18	35999	36016		263	p6	(ATTTAT)3	18	36049	36066		263	p6	(ATTTAT)3	18	36058	36075		259	p6	(ATTTAT)3	18	35517	35534
261	p6	(ATTTAT)2	12	36018	36029		264	p6	(ATTTAT)2	12	36068	36079		264	p6	(ATTTAT)2	12	36077	36088		260	p6	(ATTTAT)2	12	35536	35547
							265	p6	(AATTAG)2	12	36137	36148		265	p6	(ATTTAT)2	12	36100	36111
262	c*	(TTTAG)2(AG)5*	18	36133	36150		266	c*	(TTTAG)2(AG)5*	18	36183	36200		266	c*	(TTTAG)2(AG)5*	18	36221	36238		261	c*	(TTTAG)2(AG)5*	18	35634	35651
263	p6	(CACTAT)2	12	36230	36241		267	p6	(CACTAT)2	12	36280	36291		267	p6	(CACTAT)2	12	36318	36329		262	p6	(CACTAT)2	12	35731	35742
264	c	(ATATA)2(TATAA)2	20	36261	36280		268	c	(ATATA)2(TATAA)2	20	36311	36330		268	c	(ATATA)2(TATAA)2	20	36349	36368		263	c	(ATATA)2(TATAA)2	20	35762	35781
265	p5	(ATATA)2	10	36336	36345		269	p5	(ATATA)2	10	36386	36395		269	p5	(ATATA)2	10	36424	36433		264	p5	(ATATA)2	10	35812	35821
														270	p6	(TTATAT)2	12	36445	36456		265	p5	(TTATA)2	10	35839	35848
																					266	p5	(TTATA)2	10	35851	35860
266	c*	(TTATAT)2(TTATA)2*	16	36382	36397		270	c*	(TTATAT)2(TTATA)2*	16	36432	36447		271	c*	(TTATAT)2(TTATA)2*	16	36470	36485
267	p5	(ATATA)2	10	36406	36415		271	p5	(ATATA)2	10	36456	36465		272	p5	(ATATA)2	10	36494	36503		267	p5	(ATATA)2	10	35892	35901
268	p5	(ATATA)2	10	36441	36450		272	p5	(ATATA)2	10	36491	36500		273	p5	(ATATA)2	10	36529	36538
														274	p6	(TTATAT)2	12	36550	36561
269	c*	(TTATAT)2(TTATA)2*	16	36487	36502		273	c*	(TTATAT)2(TTATA)2*	16	36537	36552		275	c*	(TTATAT)2(TTATA)2*	16	36575	36590
270	p5	(ATATA)2	10	36511	36520		274	p5	(ATATA)2	10	36561	36570		276	p5	(ATATA)2	10	36599	36608
271	c*	(AATAA)2(AAT)6*(AATAA)2*	30	36563	36592		275	c*	(AATAA)2(AAT)6*(AATAA)2*	30	36613	36642		277	c*	(AATAA)2(AAT)6*(AATAA)2*	30	36651	36680
272	c*	(AATAA)2(AAT)4*(AATAA)2*	24	36655	36678		276	c*	(AATAA)2(AAT)4*(AATAA)2*	24	36697	36720		278	c*	(AATAA)2(AAT)4*(AATAA)2*	24	36735	36758
273	p5	(ATAAT)2	10	36700	36709		277	p5	(ATAAT)2	10	36742	36751		279	p5	(ATAAT)2	10	36780	36789
274	c*	(ATTTT)2(TTTTAT)2*(TATTT)2*(TTTTAT)2*	26	36719	36744		278	c*	(ATTTT)2(TTTTAT)2*(TATTT)2*(TTTTAT)2*	26	36761	36786		280	c*	(ATTTT)2(TTTTAT)2*(TATTT)2*(TTTTAT)2*	26	36799	36824
275	p5	(ATAAT)2	10	36783	36792		279	p5	(ATAAT)2	10	36825	36834		281	p5	(ATAAT)2	10	36863	36872
276	p5	(ATAAT)2	10	36827	36836		280	p5	(ATAAT)2	10	36869	36878		282	p5	(ATAAT)2	10	36907	36916
277	p6	(ATTATA)2	12	36865	36876		281	p6	(ATTATA)2	12	36907	36918		283	p6	(ATTATA)2	12	36945	36956
278	p5	(TATTA)2	10	36996	37005		282	p5	(TTATT)2	10	36983	36992		284	p5	(TTATT)2	10	37021	37030
279	p5	(TTATA)2	10	37079	37088		283	p5	(TATTA)2	10	37076	37085		285	p5	(TATTA)2	10	37114	37123
280	p5	(AATTA)2	10	37115	37124		284	p5	(TTATA)2	10	37169	37178		286	p5	(TTATA)2	10	37207	37216
281	p5	(TAATA)2	10	37132	37141		285	p5	(AATTA)2	10	37205	37214		287	p5	(AATTA)2	10	37243	37252
282	p5	(AATAT)2	10	37156	37165		286	p5	(TAATA)2	10	37222	37231		288	p5	(TAATA)2	10	37260	37269		268	p5	(TAATA)2	10	35942	35951
283	p5	(TAATA)2	10	37177	37186		287	p5	(TAATA)2	10	37241	37250		289	p5	(AATAT)2	10	37284	37293		269	p5	(AATAA)2	10	35955	35964
							288	p5	(AATAT)2	10	37265	37274		290	p5	(TAATA)2	10	37305	37314
							289	c*	(TAATA)2(ATA)4*(ATAAT)2*	20	37286	37305
														291	c	(TATTA)2(TATAT)2	20	37327	37346
																					270	c	(ATATA)2(ATAAT)2(ATATA)2	30	35971	36000
284	c	(TATTA)2(TATAT)2	20	37210	37229		290	c	(TATTA)2(TATAT)2	20	37314	37333		292	c	(TATTA)2(TTATA)2	20	37351	37370
285	p5	(TATTA)2	10	37234	37243		291	p5	(TATTA)2	10	37338	37347		293	p5	(TAATA)2	10	37380	37389
286	p5	(TAATA)2	10	37255	37264		292	p5	(TAATA)2	10	37359	37368		294	p5	(AATTA)2	10	37391	37400
287	p5	(AATTA)2	10	37266	37275		293	p5	(AATTA)2	10	37370	37379
288	c*	(ATAAAT)2(TAATA)2(ATAAAT)2*	31	37281	37311		294	c*	(ATAAAT)2(TAATA)2(ATAAAT)2*	31	37385	37415		295	c*	(ATAAAT)2(TAATA)2(ATAAAT)2*	31	37406	37436
289	p5	(TAATA)2	10	37343	37352		295	p5	(TAATA)2	10	37447	37456		296	p5	(TAATA)2	10	37468	37477
290	p5	(ATATT)2	10	37367	37376		296	p5	(ATATT)2	10	37471	37480		297	p5	(ATATT)2	10	37492	37501
291	p5	(TATAT)3	15	37378	37392		297	p5	(TATAT)3	15	37482	37496		298	p5	(TATAT)3	15	37503	37517
292	p5	(TAATA)2	10	37401	37410		298	p5	(TAATA)2	10	37505	37514		299	p5	(TAATA)2	10	37526	37535
293	p5	(TAATA)2	10	37420	37429		299	p5	(TAATA)2	10	37524	37533		300	p5	(TAATA)2	10	37545	37554
294	p6	(AATAAA)2	12	37449	37460		300	p6	(AATAAA)2	12	37553	37564		301	p6	(AATAAA)2	12	37574	37585
295	p5	(ATATA)2	10	37497	37506		301	p5	(ATATA)2	10	37601	37610		302	p5	(ATATA)2	10	37622	37631
296	p5	(ATATA)3	15	37543	37557		302	p5	(ATATA)3	15	37647	37661		303	p5	(ATATA)3	15	37668	37682
297	p5	(TAATA)2	10	37599	37608		303	p5	(TAATA)2	10	37703	37712		304	p5	(TAATA)2	10	37724	37733
298	c*	(ATATA)2(AATATA)2*	16	37627	37642		304	c*	(ATATA)2(AATATA)2*	16	37731	37746		305	c*	(ATATA)2(AATATA)2*	16	37752	37767
299	c*	(ATAAT)2(AATATA)2*	19	37644	37662		305	c*	(ATAAT)2(AATATA)2*	19	37748	37766		306	c*	(ATAAT)2(AATATA)2*	19	37769	37787
300	p6	(AATATA)2	12	37668	37679
301	p5	(TAATT)2	10	37707	37716		306	p5	(TAATT)2	10	37794	37803		307	p5	(TAGAA)2	10	37791	37800
302	p5	(TATTA)2	10	37778	37787		307	p5	(TATTA)2	10	37854	37863		308	p5	(TAATT)2	10	37815	37824
303	p5	(TATTA)2	10	37804	37813		308	p5	(TATTA)2	10	37880	37889		309	p5	(TATTA)2	10	37875	37884
304	p5	(TATTA)2	10	37818	37827		309	p5	(TATTA)2	10	37894	37903		310	p5	(TATTA)2	10	37915	37924
305	c*	(TAATA)2(ATA)4*	16	37865	37880		310	c*	(TAATA)2(ATA)4*	16	37941	37956		311	c*	(TAATA)2(ATA)4*	16	37962	37977
306	p3	(TAT)6	18	37927	37944		311	p3	(TAT)6	18	38003	38020		312	p3	(TAT)6	18	38024	38041
307	c*	(TAATA)2(ATAAAT)2*	19	37962	37980		312	c*	(TAATA)2(ATAAAT)2*	19	38038	38056		313	c*	(TAATA)2(ATAAAT)2*	19	38059	38077
308	p5	(TAATA)3	15	38000	38014		313	p5	(TAATA)3	15	38076	38090		314	p5	(TAATA)3	15	38097	38111
309	c*	(ATTAAT)2(TAATA)2*(ATAAAT)2*(TAATA)2	37	38026	38062		314	c*	(ATTAAT)2(TAATA)2*(ATAAAT)2*(TAATA)2	37	38102	38138		315	c*	(ATTAAT)2(TAATA)2*(ATAAAT)2*(TAATA)2	37	38123	38159
																					271	p5	(TATAA)2	10	36015	36024
310	p5	(TAATA)3	15	38066	38080		315	p5	(TAATA)3	15	38142	38156		316	p5	(TAATA)3	15	38163	38177
311	p5	(ATATT)2	10	38102	38111		316	p5	(ATATT)2	10	38178	38187		317	p5	(ATATT)2	10	38199	38208
312	p5	(TAATA)2	10	38134	38143		317	c*	(ATAATT)2(TAATA)2*	21	38212	38232		318	p5	(TAATA)2	10	38231	38240
313	c	(TATAT)2(TAATTA)2	22	38152	38173		318	p5	(TATAT)2	10	38241	38250		319	p5	(TATAT)2	10	38249	38258
314	c*	(TAATA)2(AATTA)2(AATTAT)2*	27	38179	38205		319	c*	(TAATA)2(AATTA)2(AATTAT)2*	27	38268	38294		320	c*	(TAATA)2(AATTA)2(AATTAT)2*	27	38276	38302
315	p5	(ATATA)4	20	38279	38298		320	p5	(ATATA)4	20	38368	38387		321	p5	(ATATA)4	20	38376	38395
316	p5	(AATAT)2	10	38316	38325		321	p5	(AATAT)2	10	38405	38414		322	p5	(AATAT)2	10	38413	38422
317	p5	(AATAT)2	10	38329	38338		322	p5	(AATAT)2	10	38418	38427		323	p5	(AATAT)2	10	38426	38435
318	p5	(TATAA)2	10	38361	38370		323	p5	(TATAA)2	10	38450	38459		324	p5	(AATAT)2	10	38461	38470		272	p5	(ATATA)2	10	36026	36035
319	p5	(ATATA)2	10	38372	38381		324	p5	(ATATA)2	10	38461	38470
320	p6	(ATATTT)2	12	38496	38507		325	p6	(ATATTT)2	12	38585	38596		325	p6	(ATATTT)2	12	38593	38604		273	p6	(ATATTT)2	12	36175	36186
321	p6	(TATATG)3	18	38521	38538		326	p6	(TATATG)3	18	38610	38627		326	p6	(TATATG)3	18	38618	38635		274	p6	(TATATG)3	18	36208	36225
322	p6	(TATGTA)2	12	38568	38579		327	p6	(TATGTA)2	12	38657	38668		327	p6	(TATGTA)2	12	38665	38676		275	p6	(TATGTA)2	12	36255	36266
323	p6	(AGTCTT)2	12	38762	38773		328	p6	(AGTCTT)2	12	38851	38862		328	p6	(AGTCTT)2	12	38859	38870		276	p6	(AGTCTT)2	12	36449	36460
324	p1	(A)12	12	38813	38824		329	p1	(A)12	12	38902	38913		329	p1	(A)12	12	38910	38921		277	p1	(A)12	12	36500	36511
325	p5	(TAATG)2	10	38839	38848		330	p5	(TAATG)2	10	38928	38937		330	p5	(TAATG)2	10	38936	38945		278	p5	(TAATG)2	10	36526	36535
326	p5	(CATTT)2	10	38898	38907		331	p5	(CATTT)2	10	38987	38996		331	p5	(CATTT)2	10	38995	39004		279	p5	(CATTT)2	10	36585	36594
327	p6	(TCATTA)2	12	39005	39016		332	p6	(TCATTA)2	12	39094	39105		332	p6	(TCATTA)2	12	39102	39113		280	p6	(TCATTA)2	12	36692	36703
328	p5	(AAGAA)2	10	39139	39148		333	p5	(AAGAA)2	10	39228	39237		333	p5	(AAGAA)2	10	39236	39245		281	p5	(AAGAA)2	10	36826	36835
329	p5	(TTCCT)2	10	39296	39305		334	p5	(TTCCT)2	10	39385	39394		334	p5	(TTCCT)2	10	39393	39402		282	p5	(TTCCT)2	10	36983	36992
330	p5	(TATTT)2	10	39374	39383		335	p5	(TATTT)2	10	39463	39472		335	p5	(TATTT)2	10	39471	39480		283	p5	(TATTT)2	10	37061	37070
331	p5	(TATTT)2	10	39449	39458		336	p5	(TATTT)2	10	39538	39547		336	p5	(TATTT)2	10	39546	39555		284	p5	(TATTT)2	10	37136	37145
332	p5	(AAAAT)2	10	39484	39493		337	p5	(AAAAT)2	10	39573	39582		337	p5	(AAAAT)2	10	39581	39590		285	p5	(AAAAT)2	10	37171	37180
333	c*	(AT)6(ATATA)2*(AT)6*(ATATA)2*	31	39714	39744		338	c*	(AT)6(ATATA)2*(AT)6*(ATATA)2*	31	39803	39833		338	c*	(AT)6(ATATA)2*(AT)6*(ATATA)2*	31	39811	39841		286	c*	(AT)6(ATATA)2*(AT)6*(ATATA)2*	31	37401	37431
334	p2	(AT)6	12	39747	39758		339	p2	(AT)6	12	39836	39847		339	p2	(AT)6	12	39844	39855		287	p2	(AT)6	12	37434	37445
335	c*	(TTATAT)2(TA)12*	31	39767	39797		340	c*	(TTATAT)2(TA)12*	31	39856	39886		340	c*	(TTATAT)2(TA)12*	31	39864	39894		288	c*	(TTATAT)2(TA)8*	23	37454	37476
336	p5	(CATAT)2	10	39914	39923		341	p5	(CATAT)2	10	40003	40012		341	p5	(CATAT)2	10	40011	40020		289	p5	(CATAT)2	10	37593	37602
337	p2	(AT)7	14	39927	39940		342	p2	(AT)7	14	40016	40029		342	p2	(AT)7	14	40024	40037		290	p2	(AT)7	14	37606	37619
338	c*	(AT)5(TATAT)2*(TA)7*	24	39942	39965		343	c*	(AT)5(TATAT)2*(TA)7*	24	40031	40054		343	c*	(AT)5(TATAT)2*(TA)7*	24	40039	40062		291	c*	(AT)5(TATAT)2*(TA)7*	24	37621	37644
339	p6	(TATATG)2	12	40010	40021		344	p6	(TATATG)2	12	40099	40110		344	p6	(TATATG)2	12	40107	40118		292	p6	(TATATG)2	12	37689	37700
340	p5	(AAATT)2	10	40047	40056		345	p5	(AAATT)2	10	40136	40145		345	p5	(AAATT)2	10	40144	40153		293	p5	(AAATT)2	10	37726	37735
341	p6	(TCATAA)2	12	40238	40249		346	p6	(TCATAA)2	12	40327	40338		346	p6	(TCATAA)2	12	40335	40346		294	p6	(TCATAA)2	12	37917	37928
342	p6	(TAGGAA)2	12	40281	40292		347	p6	(TAGGAA)2	12	40370	40381		347	p6	(TAGGAA)2	12	40378	40389		295	p6	(TAGGAA)2	12	37960	37971
343	p5	(TCGTT)2	10	40572	40581		348	p5	(TCGTT)2	10	40661	40670		348	p5	(TCGTT)2	10	40669	40678		296	p5	(TCGTT)2	10	38251	38260
344	p5	(TGGTC)2	10	40591	40600		349	p5	(TGGTC)2	10	40680	40689		349	p5	(TGGTC)2	10	40688	40697		297	p5	(TGGTC)2	10	38270	38279
345	p5	(CTGCT)2	10	41117	41126		350	p5	(CTGCT)2	10	41206	41215		350	p5	(CTGCT)2	10	41214	41223		298	p5	(CTGCT)2	10	38796	38805
346	p6	(CTTTAG)2	12	41562	41573		351	p6	(CTTTAG)2	12	41651	41662		351	p6	(CTTTAG)2	12	41659	41670		299	p6	(CTTTAG)2	12	39241	39252
347	p6	(CTCAAG)2	12	42432	42443		352	p6	(CTCAAG)2	12	42521	42532		352	p6	(CTCAAG)2	12	42529	42540		300	p6	(CTCAAG)2	12	40111	40122
348	c*	(T)10(TTTTTC)2*	17	43019	43035		353	c*	(T)10(TTTTTC)2*	17	43108	43124		353	c*	(T)10(TTTTTC)2*	17	43116	43132		301	p6	(TTTTTC)2	12	40702	40713
349	p4	(TATT)3	12	43061	43072		354	p4	(TATT)3	12	43150	43161		354	p4	(TATT)3	12	43158	43169		302	p4	(TATT)3	12	40739	40750
350	p6	(TATTTA)2	12	43076	43087		355	p6	(TATTTA)2	12	43165	43176		355	p6	(TATTTA)2	12	43173	43184		303	p6	(TATTTA)2	12	40754	40765
351	p5	(TAAAG)2	10	43174	43183		356	p5	(TAAAG)2	10	43263	43272		356	p5	(TAAAG)2	10	43271	43280		304	p5	(TAAAG)2	10	40852	40861
352	p5	(TTGTG)2	10	43454	43463		357	p5	(TTGTG)2	10	43543	43552		357	p5	(TTGTG)2	10	43551	43560		305	p5	(TTGTG)2	10	41132	41141
353	p6	(AATAAA)2	12	43499	43510		358	p6	(AATAAA)2	12	43588	43599		358	p6	(AATAAA)2	12	43596	43607		306	p6	(AATAAA)2	12	41177	41188
354	p5	(TGGAT)2	10	43809	43818		359	p5	(TGGAT)2	10	43898	43907		359	p5	(TGGAT)2	10	43906	43915		307	p5	(TGGAT)2	10	41487	41496
355	p1	(A)10	10	43877	43886		360	p1	(A)11	11	43966	43976		360	p1	(A)10	10	43974	43983		308	p1	(A)11	11	41555	41565
356	p5	(AATAA)2	10	43889	43898		361	p5	(AATAA)2	10	43979	43988		361	p5	(AATAA)2	10	43986	43995		309	p5	(AATAA)2	10	41568	41577
357	p5	(TAGTG)2	10	44155	44164		362	p5	(TAGTG)2	10	44245	44254		362	p5	(TAGTG)2	10	44252	44261		310	p5	(TAGTG)2	10	41834	41843
358	p1	(A)14	14	44203	44216		363	p1	(A)14	14	44293	44306		363	p1	(A)13	13	44300	44312		311	p1	(A)12	12	41882	41893
359	p5	(AATAG)2	10	44359	44368		364	p5	(AATAG)2	10	44449	44458		364	p5	(AATAG)2	10	44455	44464		312	p5	(AATAG)2	10	42036	42045
360	p5	(CCATC)2	10	45238	45247		365	p5	(CCATC)2	10	45328	45337		365	p5	(CCATC)2	10	45334	45343		313	p5	(CCATC)2	10	42915	42924
361	p5	(ATGTG)2	10	45294	45303		366	p5	(ATGTG)2	10	45384	45393		366	p5	(ATGTG)2	10	45390	45399		314	p5	(ATGTG)2	10	42971	42980
362	p6	(GAGAAA)2	12	46240	46251		367	p6	(GAGAAA)2	12	46330	46341		367	p6	(GAGAAA)2	12	46336	46347		315	p6	(GAGAAA)2	12	43917	43928
363	p5	(CCAAG)2	10	46525	46534		368	p5	(CCAAG)2	10	46615	46624		368	p5	(CCAAG)2	10	46621	46630		316	p5	(CCAAG)2	10	44202	44211
364	p5	(ACCAA)2	10	47023	47032		369	p5	(ACCAA)2	10	47113	47122		369	p5	(ACCAA)2	10	47119	47128		317	p5	(ACCAA)2	10	44700	44709
365	p5	(GAAAC)2	10	47660	47669		370	p5	(GAAAC)2	10	47750	47759		370	p5	(GAAAC)2	10	47756	47765		318	p5	(GAAAC)2	10	45337	45346
366	p6	(TATTTA)2	12	49452	49463		371	p6	(TATTTA)2	12	49542	49553		371	p6	(TATTTA)2	12	49548	49559		319	p6	(TATTTA)2	12	47129	47140
367	p6	(TGATAT)2	12	49529	49540		372	p6	(TGATAT)2	12	49619	49630		372	p6	(TGATAT)2	12	49633	49644		320	p6	(TGATAT)2	12	47206	47217
368	p6	(ATAAAT)2	12	49676	49687		373	p6	(ATAAAT)2	12	49766	49777		373	p6	(ATAAAT)2	12	49780	49791		321	p6	(ATAAAT)2	12	47353	47364
369	p5	(TTAAT)2	10	49789	49798		374	p5	(TTAAT)2	10	49879	49888		374	p5	(TTAAT)2	10	49893	49902		322	p5	(TTAAT)2	10	47455	47464
																					323	p5	(TTAAT)2	10	47471	47480
370	p5	(TATTT)2	10	49988	49997		375	p5	(TATTT)2	10	50078	50087		375	p5	(TATTT)2	10	50092	50101		324	p5	(TATTT)2	10	47670	47679
371	p5	(GAATT)2	10	50018	50027		376	p5	(GAATT)2	10	50108	50117		376	p5	(GAATT)2	10	50122	50131		325	p5	(GAATT)2	10	47700	47709
372	p5	(CGTAA)2	10	50316	50325		377	p5	(CGTAA)2	10	50406	50415		377	p5	(CGTAA)2	10	50420	50429		326	p5	(CGTAA)2	10	47998	48007
373	p5	(ATAAA)2	10	50496	50505		378	p5	(ATAAA)2	10	50586	50595		378	p5	(ATAAA)2	10	50600	50609		327	p5	(ATAAA)2	10	48185	48194
374	p5	(CATAA)2	10	51870	51879		379	p5	(CATAA)2	10	51960	51969		379	p5	(CATAA)2	10	51974	51983		328	p5	(CATAA)2	10	49559	49568
375	c*	(CATAAT)2(ATAAT)2*	17	51921	51937		380	c*	(CATAAT)2(ATAAT)2*	17	52011	52027		380	c*	(CATAAT)2(ATAAT)2*	17	52025	52041
376	p5	(AATAT)2	10	51943	51952		381	c*	(AATAT)2(TAATAT)2*(TAATA)2*	20	52033	52052		381	c*	(AATAT)2(TAATAT)2*(TAATA)2*	20	52047	52066
																					329	c*	(CATAAT)2(ATAAT)2*(TAATAT)2*(TAATA)2*	29	49610	49638
														382	p5	(TAATA)2	10	52070	52079
377	p5	(TAATA)2	10	51957	51966		382	p5	(TAATA)2	10	52068	52077		383	p5	(TAATA)2	10	52095	52104		330	p5	(TAATA)2	10	49654	49663
378	p5	(ATAAA)2	10	51971	51980		383	p5	(ATAAA)2	10	52082	52091		384	p5	(ATAAA)2	10	52109	52118
379	p6	(TAATAT)2	12	51984	51995		384	p6	(TAATAT)2	12	52095	52106		385	p6	(TAATAT)2	12	52122	52133		331	p6	(TAATAT)2	12	49669	49680
380	c*	(ATTATA)2(ATAAT)2(TAATAT)2*(TAATA)4*	44	52000	52043		385	c*	(ATTATA)2(ATAAT)2(TAATAT)2*(TAATA)4*(TAATAT)2*(TAATA)2*	55	52111	52165		386	c*	(ATTATA)2(ATAAT)2(TAATAT)2*(TAATA)3*(TAATAT)2*(TAATA)2*	50	52138	52187		332	c*	(ATTATA)2(ATAAT)2(TAATAT)2*(TAATA)2*	34	49685	49718
381	p5	(TAATA)2	10	52049	52058		386	p5	(TAATA)3	15	52167	52181		387	p5	(TAATA)3	15	52189	52203		333	p5	(TAATA)3	15	49720	49734
382	p5	(TAATA)2	10	52064	52073		387	p5	(TAATA)2	10	52187	52196		388	p5	(TAATA)2	10	52218	52227		334	p5	(TAATA)2	10	49740	49749
383	p5	(TAATA)2	10	52086	52095		388	p5	(TAATA)2	10	52202	52211		389	p5	(TAATA)2	10	52233	52242		335	p5	(TAATA)2	10	49762	49771
384	p5	(TAATA)2	10	52101	52110		389	p5	(TAATA)2	10	52224	52233		390	p5	(TAATA)2	10	52255	52264
																					336	c*	(TTTAAT)2(TAATA)2*	18	49775	49792
							390	p5	(TAATA)2	10	52239	52248		391	p5	(TAATA)2	10	52270	52279
							391	p6	(ATTATA)2	12	52256	52267		392	p6	(ATTATA)2	12	52287	52298		337	p6	(ATTATA)2	12	49800	49811
							392	p5	(TAATA)2	10	52273	52282		393	p5	(TAATA)2	10	52304	52313
							393	p6	(ATTATA)2	12	52290	52301		394	p6	(ATTATA)2	12	52321	52332		338	p6	(ATTATA)2	12	49814	49825
385	c*	(ATATA)2(AT)6*	17	52113	52129		394	c*	(ATATA)2(AT)6*	17	52307	52323		395	c*	(ATATA)2(AT)6*	17	52338	52354
386	c*	(AT)6(ATA)4*(AT)5*(TATAT)2*(TA)5*(ATA)5*(ATAAT)2*	55	52134	52188		395	c*	(AT)6(ATA)4*(AT)5*(TATAT)2*(TA)5*(ATA)5*(ATAAT)2*	55	52328	52382		396	c*	(AT)6(ATA)4*(AT)5*(TATAT)2*(TA)5*(ATA)5*(ATAAT)2*	55	52359	52413		339	c*	(AT)6(ATA)4*	22	49844	49865
387	p3	(ATA)4	12	52191	52202		396	p3	(ATA)4	12	52385	52396		397	p3	(ATA)4	12	52416	52427
388	p5	(ATTAT)2	10	52220	52229		397	p5	(ATTAT)2	10	52414	52423		398	p5	(ATTAT)2	10	52445	52454
389	p5	(ATTAT)2	10	52268	52277		398	p5	(ATTAT)2	10	52449	52458		399	p5	(ATTAT)2	10	52480	52489
390	p5	(ATTAT)2	10	52285	52294		399	p5	(ATTAT)2	10	52466	52475		400	p5	(ATTAT)2	10	52497	52506		340	p5	(ATTAT)2	10	49883	49892
391	p3	(AAT)5	15	52305	52319		400	p3	(AAT)5	15	52486	52500		401	p3	(AAT)5	15	52517	52531		341	p3	(AAT)5	15	49903	49917
392	c	(ATTAT)2(TATAT)2	20	52338	52357		401	c	(ATTAT)2(TATAT)2	20	52519	52538		402	c	(ATTAT)2(TATAT)2	20	52550	52569
393	p6	(AATATA)2	12	52388	52399		402	p6	(AATATA)2	12	52569	52580		403	p6	(AATATA)2	12	52600	52611
394	c	(ATTAT)2(TATAT)2	20	52427	52446		403	c	(ATTAT)2(TATAT)2	20	52608	52627		404	c	(ATTAT)2(TATAT)2	20	52639	52658
																					342	c*	(ATTAT)2(TATAT)2(TTATAT)2*	26	49936	49961
395	c*	(AATATA)2(ATATA)2*(AATATA)2*	27	52476	52502		404	c*	(AATATA)2(ATATA)2*(AATATA)2*	27	52657	52683		405	c*	(AATATA)2(ATATA)2*(AATATA)2*	27	52688	52714		343	c*	(AATATA)2(ATATA)2*(AATATA)2*	27	49983	50009
396	p6	(AATATA)2	12	52540	52551		405	p6	(AATATA)2	12	52721	52732		406	p6	(AATATA)2	12	52752	52763
397	p6	(TAAATA)2	12	52588	52599		406	p6	(TAAATA)2	12	52769	52780		407	p6	(TAAATA)2	12	52800	52811		344	p6	(AATATA)2	12	50043	50054
398	p6	(ATTATA)2	12	52601	52612		407	p6	(ATTATA)2	12	52782	52793		408	p6	(ATTATA)2	12	52813	52824		345	p6	(TAAATA)2	12	50070	50081
																					346	c	(ATATA)2(TAATA)2	20	50102	50121
399	c	(ATATA)2(TAATA)3	25	52635	52659		408	c	(ATATA)2(TAATA)3	25	52807	52831		409	c	(ATATA)2(TAATA)3	25	52838	52862		347	c	(ATATA)2(TAATA)3	25	50124	50148
																					348	c	(ATATA)2(TAATA)3	25	50188	50212
400	p5	(AAATA)2	10	52665	52674		409	p5	(AAATA)2	10	52837	52846		410	p5	(AAATA)2	10	52868	52877		349	p5	(AAATA)2	10	50218	50227
401	c*	(ATAAT)3(ATAATT)2*	25	52682	52706		410	c*	(ATAAT)3(ATAATT)2*	25	52854	52878		411	c*	(ATAAT)3(ATAATT)2*	25	52885	52909		350	c*	(ATAAT)3(ATAATT)2*	25	50235	50259
402	p6	(TAATTA)2	12	52712	52723		411	p6	(TAATTA)2	12	52884	52895		412	p6	(TAATTA)2	12	52934	52945		351	p6	(TAATTA)2	12	50265	50276
403	p6	(TAATTA)2	12	52731	52742		412	p6	(TAATTA)2	12	52903	52914									352	p6	(TAATTA)2	12	50284	50295
404	p6	(TAAATA)2	12	52788	52799		413	p6	(TAAATA)2	12	52960	52971		413	c	(TAAATA)2(AATATA)2	24	52991	53014		353	p6	(TAAATA)2	12	50341	50352
																					354	p5	(AATAT)2	10	50367	50376
405	p5	(AATAT)2	10	52814	52823		414	p5	(AATAT)2	10	52986	52995		414	p5	(AATAT)2	10	53027	53036		355	p5	(AATAT)2	10	50380	50389
406	p5	(AATAT)2	10	52827	52836		415	p5	(AATAT)2	10	52999	53008		415	p5	(AATAT)2	10	53040	53049		356	p5	(AATAT)2	10	50393	50402
407	c*	(ATATA)2(ATATAA)2*	19	52847	52865		416	c*	(ATATA)2(ATATAA)2*	19	53019	53037		416	c*	(ATATA)2(ATATAA)2*	19	53060	53078
																					357	p5	(ATATA)2	10	50413	50422
																					358	p5	(AATAT)3	15	50443	50457
408	c*	(AATAT)3(ATATAA)2*(AATAT)2*	28	52877	52904		417	c*	(AATAT)3(ATATAA)2*(AATAT)2*	28	53049	53076		417	c*	(AATAT)3(ATATAA)2*(AATAT)2*	28	53090	53117		359	c*	(AATAT)3(ATATAA)2*(AATAT)2*	28	50476	50503
409	p5	(AATAT)2	10	52923	52932		418	p5	(AATAT)2	10	53095	53104		418	p5	(AATAT)2	10	53136	53145		360	p5	(AATAT)2	10	50522	50531
410	p3	(ATA)4	12	53075	53086		419	p3	(ATA)4	12	53201	53212		419	p3	(ATA)4	12	53242	53253
411	p5	(AATAT)2	10	53091	53100		420	p5	(AATAT)2	10	53217	53226		420	p5	(AATAT)2	10	53258	53267		361	p5	(AATAT)2	10	50608	50617
412	p5	(AATAT)2	10	53111	53120		421	p5	(AATAT)2	10	53237	53246		421	p5	(AATAT)2	10	53278	53287		362	p5	(AATAT)2	10	50629	50638
413	p5	(AATAT)2	10	53132	53141		422	p5	(AATAT)2	10	53258	53267		422	p5	(AATAT)2	10	53299	53308		363	p5	(AATAT)2	10	50656	50665
414	p5	(AATAT)2	10	53159	53168		423	p5	(AATAT)2	10	53285	53294		423	p5	(AATAT)2	10	53326	53335		364	p5	(AATAT)2	10	50672	50681
415	p5	(AATAT)2	10	53175	53184		424	p5	(AATAT)2	10	53301	53310		424	p5	(AATAT)2	10	53342	53351
416	p6	(ATAAAT)2	12	53224	53235		425	p6	(ATAAAT)2	12	53350	53361		425	p6	(ATAAAT)2	12	53391	53402		365	p6	(ATAAAT)2	12	50721	50732
417	p6	(AAATAT)2	12	53243	53254		426	p6	(AAATAT)2	12	53369	53380		426	p6	(AAATAT)2	12	53410	53421		366	p6	(AAATAT)2	12	50740	50751
418	c*	(AATAT)2(AATATA)2*(AATAT)3*	26	53259	53284		427	c*	(AATAT)2(AATATA)2*(AATAT)2*	21	53385	53405		427	c*	(AATAT)2(AATATA)2*(AATAT)2*	21	53426	53446		367	c*	(AATAT)2(AATATA)2*(AATAT)2*	21	50756	50776
																					368	c*	(AATAT)2(AATATA)2*(AATAT)2*(AATA)3(ATAAT)2*	40	50798	50837
																					369	c*	(ATATAA)2(AATAT)2*	15	50864	50878
419	p5	(AATAT)2	10	53297	53306		428	p5	(AATAT)2	10	53418	53427		428	p5	(AATAT)2	10	53459	53468
420	p5	(TAAAT)2	10	53313	53322		429	p5	(TAAAT)2	10	53434	53443		429	p5	(TAAAT)2	10	53475	53484		370	p5	(TAAAT)2	10	50902	50911
421	p5	(AAATA)2	10	53328	53337		430	p5	(AAATA)2	10	53449	53458		430	p5	(AAATA)2	10	53490	53499		371	p5	(AAATA)2	10	50917	50926
422	p6	(AATATA)2	12	53436	53447		431	p6	(ATTTAA)2	12	53527	53538		431	p6	(AATATA)2	12	53576	53587		372	p6	(AATATA)2	12	50994	51005
423	p6	(AAATAT)2	12	53460	53471		432	p6	(AATATA)2	12	53541	53552		432	p6	(AATATA)2	12	53592	53603		373	p6	(AATATA)2	12	51010	51021
							433	p6	(AATATA)2	12	53557	53568
							434	p6	(AAATAT)2	12	53581	53592		433	c*	(AAATAT)2(ATA)6*	28	53616	53643
424	p5	(AAATA)2	10	53492	53501		435	p5	(AAATA)2	10	53613	53622		434	p5	(AAATA)2	10	53657	53666
425	p4	(AATA)3	12	53510	53521		436	p4	(AATA)3	12	53631	53642		435	p4	(AATA)3	12	53675	53686		374	p4	(AATA)3	12	51045	51056
426	p6	(AATAAA)2	12	53550	53561		437	p6	(AATAAA)2	12	53671	53682		436	p6	(AATAAA)2	12	53715	53726		375	p6	(AATAAA)2	12	51085	51096
427	p6	(AAATAA)2	12	53579	53590		438	p6	(AAATAA)2	12	53700	53711		437	p6	(AAATAA)2	12	53744	53755		376	p6	(AAATAA)2	12	51104	51115
428	p1	(A)11	11	53593	53603		439	p1	(A)10	10	53714	53723		438	p1	(A)10	10	53758	53767		377	p1	(A)12	12	51118	51129
429	p5	(TCTAT)2	10	53751	53760		440	p5	(TCTAT)2	10	53871	53880		439	p5	(TCTAT)2	10	53915	53924		378	p5	(TCTAT)2	10	51277	51286
430	p1	(A)11	11	53850	53860		441	p1	(A)11	11	53970	53980		440	p1	(A)11	11	54014	54024		379	p1	(A)11	11	51376	51386
431	p5	(TAAAT)2	10	54126	54135		442	p5	(TAAAT)2	10	54246	54255		441	p5	(TAAAT)2	10	54290	54299		380	p5	(TAAAT)2	10	51652	51661
432	p5	(AGAAA)2	10	54226	54235		443	p5	(AGAAA)2	10	54346	54355		442	p5	(AGAAA)2	10	54390	54399		381	p5	(AGAAA)2	10	51752	51761
433	p5	(ATAGT)2	10	54261	54270		444	p5	(ATAGT)2	10	54381	54390		443	p5	(ATAGT)2	10	54425	54434		382	p5	(ATAGT)2	10	51787	51796
434	p5	(ATCAA)2	10	54706	54715		445	p5	(ATCAA)2	10	54826	54835		444	p5	(ATCAA)2	10	54870	54879		383	p5	(ATCAA)2	10	52232	52241
435	p6	(TAACAG)2	12	54743	54754		446	p6	(TAACAG)2	12	54863	54874		445	p6	(TAACAG)2	12	54907	54918		384	p6	(TAACAG)2	12	52269	52280
436	p5	(TTTCT)2	10	54762	54771		447	p5	(TTTCT)2	10	54882	54891		446	p5	(TTTCT)2	10	54926	54935		385	p5	(TTTCT)2	10	52288	52297
437	c*	(AATAA)2(AAAT)3*	16	55611	55626		448	c*	(AATAA)2(AAAT)3*	16	55731	55746		447	c*	(AATAA)2(AAAT)3*	16	55775	55790		386	c*	(AATAA)2(AAAT)3*	16	53137	53152
438	p6	(AATTAA)2	12	55682	55693		449	p6	(AATTAA)2	12	55802	55813		448	p6	(AATTAA)2	12	55846	55857		387	p6	(AATTAA)2	12	53208	53219
439	p5	(TATAT)2	10	55724	55733		450	p5	(TATAT)2	10	55844	55853		449	p5	(TATAT)2	10	55888	55897		388	p5	(TATAT)2	10	53267	53276
440	p6	(CGACAT)2	12	55881	55892		451	p6	(CGACAT)2	12	56001	56012		450	p6	(CGACAT)2	12	56045	56056
441	p6	(CGACAT)2	12	55900	55911		452	p6	(CGACAT)2	12	56020	56031		451	p6	(CGACAT)2	12	56064	56075		389	p6	(CGACAT)2	12	53443	53454
442	c*	(AACAA)2(ACAAAT)2*	18	55985	56002		453	c*	(AACAA)2(ACAAAT)2*	18	56105	56122		452	c*	(AACAA)2(ACAAAT)2*	18	56149	56166		390	c*	(AACAA)2(ACAAAT)2*	18	53528	53545
443	p6	(TAATTA)2	12	56181	56192		454	p6	(TAATTA)2	12	56301	56312		453	p6	(TAATTA)2	12	56345	56356		391	p6	(TAATTA)2	12	53724	53735
444	p6	(TAATTA)2	12	56211	56222		455	p6	(TAATTA)2	12	56331	56342		454	p6	(TAATTA)2	12	56375	56386		392	p6	(TAATTA)2	12	53754	53765
445	p6	(TAATTA)2	12	56224	56235		456	p6	(TAATTA)2	12	56344	56355		455	p6	(TAATTA)2	12	56388	56399		393	p6	(TAATTA)2	12	53767	53778
446	p5	(TATTA)2	10	56314	56323		457	p5	(TATTA)2	10	56434	56443		456	p5	(TATTA)2	10	56478	56487		394	p5	(TATTA)2	10	53857	53866
447	p5	(TAAAA)2	10	56426	56435		458	p5	(TAAAA)2	10	56546	56555		457	p5	(TAAAA)2	10	56599	56608		395	p5	(TAAAA)2	10	53969	53978
448	p1	(T)12	12	56602	56613
																					396	p5	(TTATT)2	10	54140	54149
																					397	p6	(TATTAA)2	12	54221	54232
449	p6	(GATAAG)2	12	56764	56775		459	p6	(GATAAG)2	12	56868	56879		458	p6	(GATAAG)2	12	56940	56951		398	p6	(GATAAG)2	12	54343	54354
450	p5	(TGAAT)2	10	56854	56863		460	p5	(TGAAT)2	10	56958	56967		459	p5	(TGAAT)2	10	57030	57039		399	p5	(TGAAT)2	10	54433	54442
451	p6	(ATAAGT)2	12	57140	57151		461	p6	(ATAAGT)2	12	57244	57255		460	p6	(ATAAGT)2	12	57316	57327		400	p6	(ATAAGT)2	12	54719	54730
452	p5	(GATTG)2	10	57196	57205		462	p5	(GATTG)2	10	57300	57309		461	p5	(GATTG)2	10	57372	57381		401	p5	(GATTG)2	10	54775	54784
453	p5	(TATTT)2	10	57517	57526		463	p5	(TATTT)2	10	57621	57630		462	p5	(TATTT)2	10	57693	57702		402	p5	(TATTT)2	10	55096	55105
454	p5	(AGATA)2	10	58046	58055		464	p5	(AGATA)2	10	58150	58159		463	p5	(AGATA)2	10	58222	58231		403	p5	(TAAGA)2	10	55628	55637
455	p5	(ATTCC)2	10	58375	58384		465	p5	(ATTCC)2	10	58479	58488		464	p5	(ATTCC)2	10	58551	58560		404	p5	(ATTCC)2	10	55954	55963
456	p5	(ATGTT)2	10	58433	58442		466	p5	(ATGTT)2	10	58537	58546		465	p5	(ATGTT)2	10	58609	58618		405	p5	(ATGTT)2	10	56012	56021
457	p5	(AGTTG)2	10	58467	58476		467	p5	(AGTTG)2	10	58571	58580		466	p5	(AGTTG)2	10	58643	58652		406	p5	(AGTTG)2	10	56046	56055
458	p6	(AATAGA)2	12	58515	58526		468	p6	(AATAGA)2	12	58619	58630		467	p6	(AATAGA)2	12	58691	58702		407	p6	(AATAGA)2	12	56094	56105
459	p5	(AATCC)2	10	58557	58566		469	p5	(AATCC)2	10	58661	58670		468	p5	(AATCC)2	10	58733	58742		408	p5	(AATCC)2	10	56136	56145
460	p5	(TGCCT)2	10	59494	59503		470	p5	(TGCCT)2	10	59598	59607		469	p5	(TGCCT)2	10	59670	59679		409	p5	(TGCCT)2	10	57073	57082
461	p5	(TATGA)2	10	60613	60622		471	p5	(TATGA)2	10	60717	60726		470	p5	(TATGA)2	10	60789	60798		410	p5	(TATGA)2	10	58192	58201
462	p6	(ATTAGT)2	12	60639	60650		472	p6	(ATTAGT)2	12	60743	60754		471	p6	(GAATTG)2	12	60833	60844
463	p6	(GAATTG)2	12	60657	60668		473	p6	(GAATTG)2	12	60761	60772		472	p6	(CACTTA)2	12	60954	60965		411	p6	(GAATTG)2	12	58237	58248
464	p6	(CACTTA)2	12	60778	60789		474	p6	(CACTTA)2	12	60882	60893		473	p6	(ATTCCA)2	12	60971	60982		412	p6	(CACTTA)2	12	58358	58369
465	p6	(ATTCCA)2	12	60795	60806		475	p6	(ATTCCA)2	12	60899	60910		474	p6	(TTATGT)2	12	61000	61011		413	p6	(ATTCCA)2	12	58375	58386
466	p6	(TTATGT)2	12	60824	60835		476	p6	(TTATGT)2	12	60928	60939									414	p6	(TTATGT)2	12	58404	58415
467	p1	(A)11	11	60892	60902		477	p1	(A)11	11	60996	61006		475	p1	(A)11	11	61068	61078		415	p1	(A)10	10	58472	58481
468	p1	(A)10	10	60904	60913		478	p1	(A)11	11	61008	61018		476	p1	(A)12	12	61080	61091		416	p1	(A)12	12	58483	58494
469	p5	(ATGTT)2	10	61002	61011		479	p5	(ATGTT)2	10	61107	61116		477	p5	(ATGTT)2	10	61180	61189		417	p5	(ATGTT)2	10	58583	58592
470	p5	(ATGAA)3	15	61022	61036		480	p5	(ATGAA)3	15	61127	61141		478	p5	(ATGAA)3	15	61200	61214		418	p5	(ATGAA)3	15	58603	58617
471	c*	(TTATAT)3(TATAT)3*	30	61047	61076		481	c*	(TTATAT)3(TATAT)3*	30	61152	61181									419	c*	(TTATAT)3(TATAT)3*	30	58628	58657
														479	c	(TATTTA)2(TATAT)3	27	61228	61254
472	p3	(TAT)6	18	61086	61103		482	p3	(TAT)6	18	61191	61208		480	p3	(TAT)6	18	61264	61281
473	c*	(TAT)8(TATAT)2*	33	61105	61137		483	c*	(TAT)5(TATAT)2*	24	61210	61233		481	p3	(TAT)5	15	61283	61297
474	p6	(TTTATA)2	12	61226	61237		484	c	(TTA)5(TATAT)2	25	61236	61260		482	c	(TTA)5(TATAT)2	25	61302	61326
475	c	(ATATA)2(TATTT)2	20	61267	61286									483	p6	(TTTATA)2	12	61415	61426
476	p5	(ATATA)2	10	61297	61306									484	p5	(ATATA)2	10	61456	61465
														485	p5	(TATTT)2	10	61479	61488
477	p6	(TTTATA)2	12	61310	61321		485	p6	(TTTATA)2	12	61376	61387		486	c*	(ATATA)2(TATATT)2*(TTATAT)2	32	61499	61530
478	c*	(ATATA)2(TATTT)2(TTTATT)2*(TTTTA)2*	32	61351	61382		486	c*	(ATATA)2(TATTT)2(TTTATT)2*(TTTTA)2*	32	61417	61448		487	c*	(ATATA)2(TATTT)2(TTTATT)2*(TTTTA)2*	32	61559	61590
479	p5	(TTATT)2	10	61389	61398		487	p5	(TTATT)2	10	61455	61464		488	p5	(TTATT)2	10	61597	61606
480	p5	(TATAT)2	10	61404	61413		488	p5	(TATAT)2	10	61470	61479		489	p5	(TATAT)2	10	61612	61621
481	c*	(TATAT)2(TTATAT)2*	16	61431	61446		489	c*	(TATAT)2(TTATAT)2*	16	61497	61512		490	c*	(TATAT)2(TTATAT)2*	16	61639	61654		420	c*	(TAT)6(TATAT)2*	27	58667	58693
482	p5	(TTTAT)2	10	61453	61462		490	p5	(TTTAT)2	10	61519	61528		491	p5	(TTTAT)2	10	61661	61670		421	p5	(TTTAT)2	10	58741	58750
483	c*	(TATTTA)2(TTA)4*(TTATAT)2*	30	61466	61495		491	p3	(TTA)4	12	61541	61552		492	c*	(TATTTA)2(TTA)4*(TTATAT)2*	30	61674	61703		422	c*	(TATTTA)2(TTA)4*(TTATAT)2*	30	58754	58783
484	p3	(TAT)4	12	61502	61513		492	p3	(TAT)4	12	61568	61579		493	p3	(TAT)4	12	61710	61721		423	p3	(TAT)4	12	58812	58823
485	p5	(ATGAA)2	10	61546	61555		493	p5	(ATGAA)2	10	61612	61621		494	p5	(ATGAA)2	10	61754	61763		424	p5	(ATGAA)2	10	58856	58865
486	p6	(TTATAT)2	12	61576	61587		494	p6	(TTATAT)2	12	61642	61653		495	p6	(TTATAT)2	12	61784	61795		425	p6	(TTATAT)2	12	58886	58897
487	p6	(TATTTA)2	12	61601	61612		495	p6	(TATTTA)2	12	61667	61678		496	p6	(TATTTA)2	12	61809	61820		426	p6	(TATTTA)2	12	58911	58922
488	c	(TATAT)2(ATTAT)3(ATATT)2	35	61621	61655		496	c	(TATAT)2(ATTAT)3(ATATT)2	35	61687	61721		497	c	(TATAT)2(ATTAT)2(ATATT)2	30	61829	61858		427	c	(TATAT)2(ATTAT)3(ATATT)2	35	58931	58965
489	p5	(TATAT)3	15	61657	61671		497	p5	(TATAT)3	15	61723	61737		498	p5	(TATAT)3	15	61860	61874		428	p5	(TATAT)3	15	58967	58981
490	c	(TTATA)2(TATTA)3	25	61675	61699		498	c	(TTATA)2(TATTA)3	25	61741	61765									429	c	(TTATA)2(TATTA)3	25	58985	59009
														499	p5	(TTATA)3	15	61878	61892
491	p5	(AATTA)2	10	61709	61718		499	p5	(AATTA)2	10	61775	61784		500	p5	(AATTA)2	10	61905	61914		430	p5	(AATTA)2	10	59019	59028
492	p5	(ATATT)2	10	61726	61735		500	p5	(ATATT)2	10	61792	61801		501	p5	(ATATT)2	10	61922	61931		431	p5	(ATATT)2	10	59053	59062
493	p5	(TATAT)2	10	61825	61834		501	p5	(TATAT)2	10	61875	61884		502	p5	(TATAT)2	10	62005	62014		432	p5	(ATATT)2	10	59104	59113
494	c*	(TA)5(ATATA)2*(AT)5*	20	61848	61867		502	c*	(TA)5(ATATA)2*(AT)5*	20	61898	61917		503	c*	(TA)5(ATATA)2*(AT)5*	20	62028	62047
																					433	p2	(TA)6	12	59203	59214
495	c*	(TA)6(TATAT)2*	18	61874	61891		503	c*	(TA)6(TATAT)2*	18	61924	61941		504	c*	(TA)6(TATAT)2*	18	62054	62071		434	c*	(TA)6(TATAT)2*	18	59222	59239
496	p5	(TATAT)2	10	61902	61911		504	p5	(TATAT)2	10	61952	61961		505	p5	(TATAT)2	10	62082	62091		435	p5	(TATAT)2	10	59250	59259
497	p5	(TATAT)2	10	61933	61942		505	p5	(TATAT)2	10	61983	61992		506	p5	(TATAT)2	10	62113	62122		436	p5	(TATAT)2	10	59281	59290
498	p5	(TATTT)2	10	61981	61990		506	p5	(TATTT)2	10	62031	62040		507	p5	(TATTT)2	10	62161	62170		437	p5	(TATTT)2	10	59329	59338
499	p5	(ATTAT)2	10	61992	62001		507	p5	(ATTAT)2	10	62042	62051		508	p5	(ATTAT)2	10	62172	62181		438	p5	(ATTAT)2	10	59340	59349
500	p5	(TATAT)2	10	62019	62028		508	p5	(TATAT)2	10	62069	62078		509	p5	(TATAT)2	10	62199	62208		439	p5	(TATAT)2	10	59367	59376
501	c*	(TTATAT)2(TATAT)3*	24	62030	62053		509	c*	(TTATAT)2(TATAT)3*	24	62080	62103		510	c*	(TTATAT)2(TATAT)3*	24	62210	62233
502	p5	(TATAT)3	15	62059	62073		510	p5	(TATAT)3	15	62109	62123		511	p5	(TATAT)3	15	62239	62253
503	p5	(ATATA)2	10	62078	62087		511	p5	(ATATA)2	10	62128	62137		512	p5	(ATATA)2	10	62258	62267
504	c	(ATTAT)2(ATATT)2	20	62091	62110		512	c	(ATTAT)2(ATATT)2	20	62141	62160		513	c	(ATTAT)2(ATATT)2	20	62271	62290
505	p5	(TAAAA)2	10	62150	62159		513	p5	(TAAAA)2	10	62200	62209		514	p5	(TAAAA)2	10	62330	62339
506	p6	(TATAAT)2	12	62162	62173		514	p6	(TATAAT)2	12	62212	62223		515	p6	(TATAAT)2	12	62342	62353
																					440	c*	(TTATAT)2(ATATA)2*	18	59378	59395
																					441	c*	(TATAT)2(TTATAT)2*(TATAT)7*	48	59399	59446
																					442	c*	(TTATAT)2(TATAT)5*	34	59448	59481
																					443	c*	(TTATAT)2(TATAT)3*(TTATAT)2*(TATAT)3*	42	59483	59524
507	p5	(ATATA)2	10	62191	62200		515	p5	(ATATA)2	10	62241	62250		516	p5	(ATATA)2	10	62371	62380		444	p5	(ATATA)2	10	59543	59552
508	p5	(ATATA)2	10	62215	62224		516	p5	(ATATA)2	10	62265	62274									445	p5	(ATATA)2	10	59685	59694
																					446	p5	(ATTAT)2	10	59698	59707
509	c	(ATTAT)2(ATATT)2	20	62228	62247		517	c	(ATTAT)2(ATATT)2	20	62278	62297		517	c	(ATTAT)2(ATATT)2	20	62384	62403
510	p5	(TTATT)2	10	62253	62262		518	p5	(TTATT)2	10	62303	62312		518	p5	(TTATT)2	10	62409	62418
511	p5	(TTATT)2	10	62266	62275		519	p5	(TTATT)2	10	62316	62325		519	p5	(TTATT)2	10	62422	62431
512	p5	(TTATT)2	10	62279	62288		520	p5	(TTATT)2	10	62329	62338		520	p5	(TTATT)2	10	62435	62444
513	c	(TATTA)2(TTATA)2	20	62313	62332		521	c	(TATTA)2(TTATA)2	20	62363	62382		521	p5	(TTATT)2	10	62448	62457
														522	p5	(TATTT)3	15	62459	62473
														523	p5	(TATAT)3	15	62486	62500		447	p5	(TATAT)3	15	59715	59729
														524	p5	(TTATT)2	10	62502	62511		448	p5	(TATTA)2	10	59748	59757
														525	p5	(TTATT)2	10	62515	62524
														526	p5	(TTATT)2	10	62528	62537
														527	p5	(TTATT)2	10	62541	62550
														528	p5	(TATTA)2	10	62575	62584
514	c*	(TTATT)2(TTTATT)2*	20	62335	62354		522	c*	(TTATT)2(TTTATT)2*	20	62385	62404		529	c*	(TTATT)2(TTTATT)2*	20	62589	62608		449	c*	(TTATT)2(TTTATT)2*	20	59762	59781
515	p5	(TTATT)2	10	62356	62365		523	p5	(TTATT)2	10	62406	62415		530	p5	(TTATT)2	10	62610	62619
516	p6	(TTATTT)2	12	62367	62378		524	p6	(TTATTT)2	12	62417	62428		531	p6	(TTATTT)2	12	62621	62632		450	p6	(TTATTT)2	12	59794	59805
517	p5	(TATAT)2	10	62405	62414		525	p5	(TATAT)2	10	62455	62464		532	p5	(TATAT)2	10	62659	62668		451	p5	(TATAT)2	10	59832	59841
518	p6	(ATATTA)2	12	62421	62432		526	p6	(ATATTA)2	12	62471	62482		533	p6	(ATATTA)2	12	62675	62686		452	p6	(ATATTA)2	12	59848	59859
519	p6	(AATATA)2	12	62440	62451		527	p6	(AATATA)2	12	62490	62501		534	p6	(AATATA)2	12	62694	62705		453	p6	(ATATTA)2	12	59862	59873
520	c*	(AATATA)2(AT)5*	17	62454	62470		528	c*	(AATATA)2(AT)5*	17	62504	62520		535	c*	(AATATA)2(AT)5*	17	62708	62724
							529	p2	(AT)8	16	62523	62538		536	c*	(AATATA)2(AT)8*	23	62742	62764		454	c*	(AATATA)2(AT)8*	23	59881	59903
521	p5	(ATAAT)2	10	62472	62481		530	p5	(ATAAT)2	10	62540	62549									455	p6	(ATAAAT)2	12	59905	59916
																					456	c*	(AATATA)2(AT)6*	19	59930	59948
522	p2	(AT)10	20	62484	62503		531	p2	(AT)10	20	62552	62571		537	p2	(AT)10	20	62780	62799		457	p2	(AT)6	12	59954	59965
523	p5	(TAAAT)2	10	62527	62536		532	p5	(TAAAT)2	10	62595	62604		538	p5	(TAAAT)2	10	62823	62832		458	p5	(TAAAT)2	10	59982	59991
																					459	c*	(AATAT)2(AATATA)2*	17	59994	60010
524	c*	(AAATAT)2(AATAT)2*(AATATA)2*	24	62538	62561		533	c*	(AAATAT)2(AATAT)2*(AATATA)2*	24	62606	62629		539	c*	(AAATAT)2(AATAT)2*(AATATA)2*	24	62834	62857
525	p6	(AAATAT)2	12	62564	62575		534	p6	(AAATAT)2	12	62632	62643		540	p6	(AAATAT)2	12	62860	62871
526	p6	(AAATAT)2	12	62579	62590		535	p6	(AAATAT)2	12	62647	62658		541	p6	(AAATAT)2	12	62875	62886
527	c*	(TATAAT)2(TATAA)2*(ATATA)2(AATATA)2*	32	62596	62627		536	c*	(TATAAT)2(TATAA)2*	16	62664	62679		542	c*	(TATAAT)2(TATAA)2*	16	62892	62907		460	c*	(TATAAT)2(TATAA)2*	16	60015	60030
528	c*	(TATAA)2(AATATA)2*(AAATA)2*	24	62629	62652		537	c*	(TATAA)2(AATATA)2*(AAATA)2*	24	62686	62709		543	c*	(TATAA)2(AATATA)2*(AAATA)2*	24	62914	62937		461	c*	(TATAA)2(AATATA)2*	15	60037	60051
529	p6	(AATATA)2	12	62654	62665		538	p6	(AATATA)2	12	62711	62722		544	p6	(AATATA)2	12	62939	62950
530	p5	(ATCTA)2	10	62689	62698		539	p5	(ATCTA)2	10	62746	62755		545	p5	(ATCTA)2	10	62974	62983
531	c	(TAATA)2(ATATA)2	20	62767	62786		540	c	(TAATA)2(ATATA)2	20	62824	62843		546	c	(TAATA)2(ATATA)2	20	63052	63071
532	p5	(ATATA)2	10	62793	62802		541	p5	(ATATA)2	10	62850	62859		547	p5	(ATATA)2	10	63078	63087
533	p5	(ATAAT)2	10	62812	62821		542	p5	(ATAAT)2	10	62869	62878		548	p5	(ATAAT)2	10	63097	63106
534	p5	(TAATA)3	15	62861	62875		543	p5	(TAATA)3	15	62918	62932		549	p5	(TAATA)3	15	63146	63160
535	p5	(ATATT)2	10	62907	62916		544	p5	(ATATT)2	10	62964	62973		550	p5	(TAATA)3	15	63173	63187
536	p5	(TAATA)2	10	62963	62972		545	p5	(TAATA)2	10	63020	63029		551	p5	(ATATT)2	10	63219	63228		462	p5	(ATCTA)2	10	60075	60084
														552	p5	(TAATA)2	10	63275	63284		463	p5	(TAATA)2	10	60092	60101
537	c*	(TAATA)2(ATAAAT)2*	19	62975	62993		546	c*	(TAATA)2(ATAAAT)2*	19	63032	63050		553	c*	(TAATA)2(ATAAAT)2*	19	63287	63305		464	c*	(TAATA)2(ATAAAT)2*	19	60104	60122
538	p5	(TGGCT)2	10	63037	63046		547	p5	(TGGCT)2	10	63094	63103		554	p5	(TGGCT)2	10	63349	63358		465	p5	(TGGCT)2	10	60166	60175
539	c*	(TTGAT)2(GATACG)2*	19	63205	63223		548	c*	(TTGAT)2(GATACG)2*	19	63262	63280		555	c*	(TTGAT)2(GATACG)2*	19	63517	63535		466	c*	(TTGAT)2(GATACG)2*	19	60334	60352
540	p5	(TTAAA)2	10	63369	63378		549	p5	(TTAAA)2	10	63426	63435		556	p5	(TTAAA)2	10	63681	63690		467	p5	(TTAAA)2	10	60498	60507
541	p1	(A)16	16	63381	63396		550	p1	(A)15	15	63438	63452		557	p1	(A)17	17	63693	63709		468	p1	(A)14	14	60510	60523
542	p5	(ACAAT)2	10	63524	63533		551	p5	(ACAAT)2	10	63580	63589		558	p5	(ACAAT)2	10	63837	63846		469	p5	(ACAAT)2	10	60651	60660
543	p6	(TAAGAT)2	12	63621	63632		552	p6	(TAAGAT)2	12	63677	63688		559	p6	(TAAGAT)2	12	63934	63945		470	p6	(TAAGAT)2	12	60748	60759
544	c*	(ATAGAA)4(AATAG)2*	27	63696	63722		553	c*	(ATAGAA)4(AATAG)2*	27	63752	63778		560	c*	(ATAGAA)3(AATAG)2*	21	64009	64029		471	c*	(ATAGAA)4(AATAG)2*	27	60823	60849
545	p6	(ACAGAA)2	12	63950	63961		554	p6	(ACAGAA)2	12	64006	64017		561	p6	(ACAGAA)2	12	64257	64268		472	p6	(ACAGAA)2	12	61077	61088
546	p6	(CTTTGC)2	12	63975	63986		555	p6	(CTTTGC)2	12	64031	64042		562	p6	(CTTTGC)2	12	64282	64293		473	p6	(CTTTGC)2	12	61102	61113
547	p1	(T)13	13	64022	64034		556	p1	(T)13	13	64078	64090		563	p1	(T)13	13	64329	64341		474	p1	(T)14	14	61149	61162
548	p6	(ACAAGA)2	12	64099	64110		557	p6	(ACAAGA)2	12	64155	64166		564	p6	(ACAAGA)2	12	64406	64417		475	p6	(ACAAGA)2	12	61227	61238
549	p5	(GTCAT)2	10	64253	64262		558	p5	(GTCAT)2	10	64309	64318		565	p5	(GTCAT)2	10	64560	64569		476	p5	(GTCAT)2	10	61381	61390
550	p5	(AAGAA)2	10	64267	64276		559	p5	(AAGAA)2	10	64323	64332		566	p5	(AAGAA)2	10	64574	64583		477	p5	(AAGAA)2	10	61395	61404
551	p2	(TA)5	10	64590	64599		560	c*	(TATAT)2(TA)5*	15	64635	64649		567	p2	(TA)5	10	64897	64906		478	p2	(TA)5	10	61718	61727
552	p1	(T)10	10	64658	64667		561	p1	(T)10	10	64708	64717		568	p1	(T)10	10	64965	64974		479	p1	(T)10	10	61786	61795
553	p5	(CGCTC)2	10	64874	64883		562	p5	(CGCTC)2	10	64924	64933		569	p5	(CGCTC)2	10	65181	65190		480	p5	(CGCTC)2	10	62002	62011
554	p5	(GTTAT)2	10	64937	64946		563	p5	(GTTAT)2	10	64987	64996		570	p5	(GTTAT)2	10	65244	65253		481	p5	(GTTAT)2	10	62065	62074
555	p5	(ATCAA)2	10	65015	65024		564	p5	(ATCAA)2	10	65065	65074		571	p5	(ATCAA)2	10	65322	65331		482	p5	(ATCAA)2	10	62143	62152
556	c*	(TTCTT)2(T)13*	21	65541	65561		565	c*	(TTCTT)2(T)13*	21	65591	65611		572	c*	(TTCTT)2(T)13*	21	65848	65868		483	c*	(TTCTT)2(T)12*	20	62669	62688
557	p1	(T)10	10	65615	65624		566	p1	(T)10	10	65665	65674		573	p1	(T)10	10	65922	65931		484	p1	(T)10	10	62742	62751
558	p5	(AATCC)2	10	65664	65673		567	p5	(AATCC)2	10	65714	65723		574	p5	(AATCC)2	10	65971	65980		485	p5	(AATCC)2	10	62791	62800
559	p6	(AGCAGG)2	12	66609	66620		568	p6	(AGCAGG)2	12	66659	66670		575	p6	(AGCAGG)2	12	66916	66927		486	p6	(AGCAGG)2	12	63736	63747
560	c*	(ATAAT)2(ATA)4*	17	67627	67643		569	c*	(ATAAT)2(ATA)4*	17	67677	67693		576	c*	(ATAAT)2(ATA)4*	17	67934	67950		487	c*	(ATAAT)2(ATA)4*	17	64754	64770
561	p1	(A)11	11	67844	67854		570	p1	(A)11	11	67894	67904		577	p1	(A)11	11	68151	68161		488	p1	(A)11	11	64971	64981
562	c*	(CATATT)2(ATATT)2*	17	67922	67938		571	c*	(CATATT)2(ATATT)2*	17	67972	67988		578	c*	(CATATT)2(ATATT)2*	17	68229	68245		489	c*	(CATATT)2(ATATT)2*	17	65049	65065
563	p5	(GATTC)2	10	67947	67956		572	p5	(GATTC)2	10	67997	68006		579	p5	(GATTC)2	10	68254	68263		490	p5	(GATTC)2	10	65074	65083
564	p1	(A)10	10	68161	68170		573	p1	(A)10	10	68211	68220		580	p1	(A)10	10	68468	68477		491	p1	(A)11	11	65288	65298
565	p5	(AATTA)2	10	69898	69907		574	p5	(AATTA)2	10	69948	69957		581	p5	(AATTA)2	10	70205	70214		492	p5	(AATTA)2	10	67026	67035
566	p5	(AAGAT)2	10	70040	70049		575	p5	(AAGAT)2	10	70090	70099		582	p5	(AAGAT)2	10	70347	70356		493	p5	(AAGAT)2	10	67171	67180
567	p6	(TTAGAA)2	12	70342	70353		576	p6	(TTAGAA)2	12	70392	70403		583	p6	(TTAGAA)2	12	70649	70660		494	p6	(TTAGAA)2	12	67473	67484
568	p5	(ATATA)2	10	70379	70388		577	p5	(ATATA)2	10	70429	70438		584	p5	(ATATA)2	10	70686	70695		495	p5	(ATATA)2	10	67510	67519
569	p6	(TATATG)2	12	70489	70500		578	p6	(TATATG)2	12	70539	70550		585	p6	(TATATG)2	12	70796	70807		496	p6	(TATATG)2	12	67620	67631
570	c*	(AAATA)2(AGTAAA)2*	21	70510	70530		579	c*	(AAATA)2(AGTAAA)2*	21	70560	70580		586	c*	(AAATA)2(AGTAAA)2*	21	70817	70837		497	c*	(AAATA)2(AGTAAA)2*	21	67641	67661
571	p6	(AGTTAC)2	12	71137	71148		580	p6	(AGTTAC)2	12	71187	71198		587	p6	(AGTTAC)2	12	71444	71455		498	p6	(AGTTAC)2	12	68268	68279
572	p5	(ATCTA)2	10	72221	72230		581	p5	(ATCTA)2	10	72271	72280									499	p5	(ATCTA)2	10	69352	69361
573	p6	(TATCTT)2	12	72655	72666		582	p6	(TATCTT)2	12	72705	72716		588	p6	(TATCTT)2	12	72962	72973		500	p6	(TATCTT)2	12	69786	69797
574	p6	(GGACCA)2	12	72824	72835		583	p6	(GGACCA)2	12	72874	72885		589	p6	(GGACCA)2	12	73131	73142		501	p6	(GGACCA)2	12	69955	69966
575	p6	(ACTTGG)2	12	72858	72869		584	p6	(ACTTGG)2	12	72908	72919		590	p6	(ACTTGG)2	12	73165	73176		502	p6	(ACTTGG)2	12	69989	70000
576	c*	(A)10(AAAT)3*	19	72928	72946		585	c*	(A)10(AAAT)3*	19	72978	72996		591	c*	(A)10(AAAT)3*	19	73235	73253
																					503	p4	(AAAT)4	16	70063	70078
577	p6	(ATATGA)2	12	73011	73022		586	p6	(ATATGA)2	12	73061	73072		592	p6	(ATATGA)2	12	73318	73329		504	p6	(ATATGA)2	12	70143	70154
578	p1	(A)10	10	73119	73128		587	p1	(A)10	10	73169	73178		593	p1	(A)10	10	73426	73435		505	p1	(A)10	10	70251	70260
579	p5	(TCGAT)2	10	73469	73478		588	p5	(TCGAT)2	10	73519	73528		594	p5	(TCGAT)2	10	73776	73785		506	p5	(TCGAT)2	10	70601	70610
580	p3	(AAG)4	12	73944	73955		589	p3	(AAG)4	12	73994	74005		595	p3	(AAG)4	12	74251	74262		507	p3	(AAG)4	12	71076	71087
581	p5	(AACTC)2	10	73994	74003		590	p5	(AACTC)2	10	74044	74053		596	p5	(AACTC)2	10	74301	74310		508	p5	(AACTC)2	10	71126	71135
582	p5	(AAGTA)2	10	74033	74042		591	p5	(AAGTA)2	10	74083	74092		597	p5	(AAGTA)2	10	74340	74349		509	p5	(AAGTA)2	10	71165	71174
583	p5	(TACAG)2	10	74087	74096		592	p5	(TACAG)2	10	74137	74146		598	p5	(TACAG)2	10	74394	74403		510	p5	(TACAG)2	10	71219	71228
584	p1	(T)11	11	74195	74205		593	p1	(T)11	11	74245	74255		599	p1	(T)10	10	74502	74511
585	p6	(TATGGT)2	12	74339	74350		594	p6	(TATGGT)2	12	74389	74400		600	p6	(TATGGT)2	12	74645	74656		511	p6	(TATGGT)2	12	71469	71480
586	p5	(CTGAG)2	10	74507	74516		595	p5	(CTGAG)2	10	74557	74566		601	p5	(CTGAG)2	10	74813	74822		512	p5	(CTGAG)2	10	71637	71646
587	p5	(GATTC)2	10	74547	74556		596	p5	(GATTC)2	10	74597	74606		602	p5	(GATTC)2	10	74853	74862		513	p5	(GATTC)2	10	71677	71686
588	p6	(TTCTAT)2	12	74579	74590		597	p6	(TTCTAT)2	12	74629	74640		603	p6	(TTCTAT)2	12	74885	74896		514	p6	(TTCTAT)2	12	71709	71720
589	p1	(A)12	12	74621	74632		598	p1	(A)12	12	74671	74682		604	p1	(A)12	12	74927	74938		515	p1	(A)11	11	71751	71761
590	p5	(AGATC)2	10	74641	74650		599	p5	(AGATC)2	10	74691	74700		605	p5	(AGATC)2	10	74947	74956		516	p5	(AGATC)2	10	71770	71779
591	p5	(ATCAG)2	10	74695	74704		600	p5	(ATCAG)2	10	74745	74754		606	p5	(ATCAG)2	10	75001	75010		517	p5	(ATCAG)2	10	71824	71833
592	p5	(ACAGA)2	10	74742	74751		601	p5	(ACAGA)2	10	74792	74801		607	p5	(ACAGA)2	10	75048	75057		518	p5	(ACAGA)2	10	71871	71880
593	p1	(A)12	12	74761	74772		602	p1	(A)11	11	74811	74821		608	p1	(A)13	13	75067	75079		519	p1	(A)12	12	71890	71901
594	p5	(TATTC)2	10	75124	75133		603	p5	(TATTC)2	10	75173	75182		609	p5	(TATTC)2	10	75431	75440		520	p5	(TATTC)2	10	72253	72262
595	p5	(TTGGT)2	10	75278	75287		604	p5	(TTGGT)2	10	75327	75336		610	p5	(TTGGT)2	10	75585	75594		521	p5	(TTGGT)2	10	72407	72416
596	p4	(AATG)3	12	75435	75446		605	p4	(AATG)3	12	75484	75495		611	p4	(AATG)3	12	75742	75753		522	p4	(AATG)3	12	72564	72575
597	p5	(AATCA)2	10	75473	75482		606	p5	(AATCA)2	10	75522	75531		612	p5	(AATCA)2	10	75780	75789		523	p5	(AATCA)2	10	72602	72611
598	p5	(GATTC)2	10	75536	75545		607	p5	(GATTC)2	10	75585	75594		613	p5	(GATTC)2	10	75843	75852		524	p5	(GATTC)2	10	72665	72674
599	p5	(AAAGA)2	10	76041	76050		608	p5	(AAAGA)2	10	76090	76099		614	p5	(AAAGA)2	10	76348	76357		525	p5	(AAAGA)2	10	73170	73179
600	p6	(ATTATG)2	12	76674	76685		609	p6	(ATTATG)2	12	76723	76734		615	p6	(ATTATG)2	12	76981	76992		526	p6	(ATTATG)2	12	73803	73814
601	p5	(TATAT)2	10	76800	76809		610	p5	(TATAT)2	10	76849	76858		616	p5	(TATAT)2	10	77107	77116		527	p5	(TATAT)2	10	73929	73938
602	p1	(T)10	10	76832	76841		611	p1	(T)11	11	76881	76891		617	p1	(T)11	11	77139	77149		528	p1	(T)10	10	73961	73970
603	p5	(TTATT)2	10	77141	77150		612	p5	(TTATT)2	10	77191	77200		618	p5	(TTATT)2	10	77449	77458		529	p5	(TTATT)2	10	74270	74279
604	p6	(ATTCAT)2	12	77190	77201		613	p6	(ATTCAT)2	12	77240	77251		619	p6	(ATTCAT)2	12	77498	77509		530	p6	(ATTCAT)2	12	74319	74330
605	p5	(TTCTT)2	10	77256	77265		614	p5	(TTCTT)2	10	77306	77315		620	p5	(TTCTT)2	10	77564	77573		531	p5	(TTCTT)2	10	74385	74394
606	p1	(A)10	10	77278	77287		615	p1	(A)10	10	77328	77337		621	p1	(A)10	10	77586	77595		532	p1	(A)10	10	74407	74416
607	p5	(TGCAT)2	10	77295	77304		616	p5	(TGCAT)2	10	77345	77354		622	p5	(TGCAT)2	10	77603	77612		533	p5	(TGCAT)2	10	74424	74433
608	p1	(T)10	10	77356	77365		617	p1	(T)10	10	77406	77415		623	p1	(T)10	10	77664	77673		534	p1	(T)10	10	74485	74494
609	p5	(ATGGA)2	10	77558	77567		618	p5	(ATGGA)2	10	77608	77617		624	p5	(ATGGA)2	10	77866	77875		535	p5	(ATGGA)2	10	74687	74696
610	p5	(ATTCA)2	10	78022	78031		619	p5	(ATTCA)2	10	78072	78081		625	p5	(ATTCA)2	10	78330	78339		536	p5	(ATTCA)2	10	75151	75160
611	p5	(TAGTA)2	10	78664	78673		620	p5	(TAGTA)2	10	78714	78723		626	p5	(TAGTA)2	10	78972	78981		537	p5	(TAGTA)2	10	75793	75802
612	p5	(CTTGT)2	10	78701	78710		621	p5	(CTTGT)2	10	78751	78760		627	p5	(CTTGT)2	10	79009	79018		538	p5	(CTTGT)2	10	75830	75839
613	p5	(CTTTC)2	10	78947	78956		622	p5	(CTTTC)2	10	78997	79006		628	p5	(CTTTC)2	10	79255	79264		539	p5	(CTTTC)2	10	76076	76085
614	p5	(AATAG)2	10	79015	79024		623	p5	(AATAG)2	10	79065	79074		629	p5	(AATAG)2	10	79323	79332		540	p5	(AATAG)2	10	76144	76153
615	p5	(TAAAG)2	10	79287	79296		624	p5	(TAAAG)2	10	79337	79346		630	p5	(TAAAG)2	10	79595	79604		541	p5	(TAAAG)2	10	76416	76425
616	p5	(TAGAT)2	10	79329	79338		625	p5	(TAGAT)2	10	79379	79388		631	p5	(TAGAT)2	10	79637	79646		542	p5	(TAGAT)2	10	76458	76467
																					543	p1	(T)10	10	76499	76508
617	p5	(ATTTA)2	10	79432	79441		626	p5	(ATTTA)2	10	79482	79491		632	p5	(ATTTA)2	10	79740	79749		544	p5	(ATTTA)2	10	76562	76571
618	p5	(ATAAA)2	10	79704	79713		627	p5	(ATAAA)2	10	79754	79763		633	p5	(ATAAA)2	10	80012	80021		545	p5	(ATAAA)2	10	76834	76843
619	p1	(A)11	11	79721	79731		628	p1	(A)11	11	79771	79781		634	p1	(A)11	11	80029	80039		546	p1	(A)11	11	76851	76861
620	p5	(TTATT)2	10	80238	80247		629	p5	(TTATT)2	10	80288	80297		635	p5	(TTATT)2	10	80546	80555		547	p5	(TTATT)2	10	77368	77377
621	p5	(GAACT)2	10	80336	80345		630	p5	(GAACT)2	10	80386	80395		636	p5	(GAACT)2	10	80644	80653		548	p5	(GAACT)2	10	77466	77475
622	p1	(T)12	12	80394	80405		631	p1	(T)12	12	80444	80455		637	p1	(T)12	12	80702	80713		549	p1	(T)12	12	77524	77535
623	p6	(AGTAAT)2	12	80505	80516		632	p6	(AGTAAT)2	12	80555	80566		638	p6	(AGTAAT)2	12	80813	80824		550	p6	(AGTAAT)2	12	77635	77646
624	p5	(CCTTT)2	10	80591	80600		633	p5	(CCTTT)2	10	80641	80650		639	p5	(CCTTT)2	10	80899	80908		551	p5	(CCTTT)2	10	77721	77730
625	c*	(ATATAA)2(AATAA)2*(TAAAAT)2*	29	80724	80752		634	c*	(ATATAA)2(AATAA)2*(TAAAAT)2*	29	80774	80802		640	c*	(ATATAA)2(AATAA)2*(TAAAAT)2*	29	81032	81060		552	c*	(ATATAA)2(AATAA)2*(TAAAAT)2*	29	77854	77882
626	p5	(AAGAA)2	10	80818	80827		635	p5	(AAGAA)2	10	80868	80877		641	p5	(AAGAA)2	10	81126	81135		553	p5	(AAGAA)2	10	77948	77957
627	p5	(ATTAT)2	10	80933	80942		636	p5	(ATTAT)2	10	80983	80992		642	p5	(ATTAT)2	10	81241	81250		554	p5	(ATTAT)2	10	78063	78072
628	p5	(ATTAT)2	10	80947	80956		637	p5	(ATTAT)2	10	80997	81006		643	p5	(ATTAT)2	10	81255	81264		555	p5	(ATTAT)2	10	78077	78086
629	p5	(CATAT)2	10	80962	80971		638	p5	(CATAT)2	10	81012	81021		644	p5	(CATAT)2	10	81270	81279		556	p5	(CATAT)2	10	78092	78101
630	p5	(CATAT)2	10	80980	80989		639	p5	(CATAT)2	10	81030	81039		645	p5	(CATAT)2	10	81288	81297
631	p6	(ATATGC)2	12	80993	81004		640	p6	(ATATGC)2	12	81043	81054		646	p6	(ATATGC)2	12	81301	81312		557	p6	(ATATGC)2	12	78105	78116
632	p5	(GGATG)2	10	81197	81206		641	p5	(GGATG)2	10	81247	81256		647	p5	(GGATG)2	10	81505	81514		558	p5	(GGATG)2	10	78309	78318
633	p5	(TAGGA)2	10	81268	81277		642	p5	(TAGGA)2	10	81318	81327		648	p5	(TAGGA)2	10	81576	81585		559	p5	(TAGGA)2	10	78380	78389
634	p6	(AAAGAA)2	12	81281	81292		643	p6	(AAAGAA)2	12	81331	81342		649	p6	(AAAGAA)2	12	81589	81600		560	p6	(AAAGAA)2	12	78393	78404
635	p3	(CTT)4	12	81536	81547		644	p3	(CTT)4	12	81586	81597		650	p3	(CTT)4	12	81844	81855		561	p3	(CTT)4	12	78648	78659
636	p5	(TAAAT)2	10	81841	81850		645	p5	(TAAAT)2	10	81891	81900									562	p5	(TAAAT)2	10	78953	78962
637	p6	(TACATA)2	12	81877	81888		646	p6	(TACATA)2	12	81927	81938		651	p6	(TACATA)2	12	82185	82196		563	p6	(TACATA)2	12	78989	79000
638	p5	(AAATA)2	10	81934	81943		647	p5	(AAATA)2	10	81984	81993		652	p5	(AAATA)2	10	82242	82251		564	p5	(AAATA)2	10	79046	79055
639	p5	(TAAAC)2	10	81963	81972		648	p5	(TAAAC)2	10	82013	82022		653	p5	(TAAAC)2	10	82271	82280		565	p5	(TAAAC)2	10	79075	79084
640	p5	(TGAAT)2	10	82289	82298		649	p5	(TGAAT)2	10	82339	82348		654	p5	(TGAAT)2	10	82597	82606		566	p5	(TGAAT)2	10	79401	79410
641	p1	(A)10	10	82377	82386		650	p1	(A)10	10	82427	82436		655	p1	(A)10	10	82685	82694		567	p1	(A)10	10	79489	79498
642	p1	(A)12	12	82388	82399		651	p1	(A)12	12	82438	82449		656	p1	(A)12	12	82696	82707		568	p1	(A)10	10	79500	79509
643	c	(T)11(ATTGAA)2	23	82420	82442		652	c	(T)11(ATTGAA)2	23	82470	82492		657	c	(T)11(ATTGAA)2	23	82728	82750		569	c	(T)11(ATTGAA)2	23	79530	79552
644	p6	(TATGTG)2	12	82565	82576		653	p6	(TATGTG)2	12	82615	82626		658	p6	(TATGTG)2	12	82873	82884		570	p6	(TATGTG)2	12	79675	79686
645	p6	(ACTATA)2	12	82687	82698		654	p6	(ACTATA)2	12	82737	82748		659	p6	(ACTATA)2	12	82995	83006		571	p6	(ACTATA)2	12	79797	79808
646	c*	(TTTCT)2(TCTTTC)2*	19	82959	82977		655	c*	(TTTCT)2(TCTTTC)2*	19	83009	83027		660	c*	(TTTCT)2(TCTTTC)2*	19	83267	83285		572	c*	(TTTCT)2(TCTTTC)2*	19	80069	80087
647	p5	(ATAAA)2	10	83035	83044		656	p5	(ATAAA)2	10	83085	83094		661	p5	(ATAAA)2	10	83343	83352		573	p5	(ATAAA)2	10	80145	80154
648	p5	(ATAAA)2	10	83143	83152		657	p5	(ATAAA)2	10	83193	83202		662	p5	(ATAAA)2	10	83451	83460		574	p5	(ATAAA)2	10	80253	80262
649	p5	(GTAAT)2	10	83155	83164		658	p5	(GTAAT)2	10	83205	83214		663	p5	(GTAAT)2	10	83463	83472		575	p5	(GTAAT)2	10	80265	80274
650	c*	(ATAAAT)2(ATAA)3*(TAAA)3(AAATA)2*	33	83182	83214		659	c*	(ATAAAT)2(ATAA)3*(TAAA)3(AAATA)2*	33	83232	83264		664	c*	(ATAAAT)2(ATAA)3*(TAAA)3(AAATA)2*	33	83490	83522		576	c*	(ATAAAT)2(ATAA)3*(TAAA)3(AAATA)2*	33	80292	80324
651	p5	(GAAGG)2	10	84281	84290		660	p5	(GAAGG)2	10	84331	84340		665	p5	(GAAGG)2	10	84589	84598		577	p5	(GAAGG)2	10	81391	81400
652	p5	(ATCTT)2	10	84340	84349		661	p5	(ATCTT)2	10	84390	84399		666	p5	(ATCTT)2	10	84648	84657		578	p5	(ATCTT)2	10	81450	81459
653	p5	(TGCAT)2	10	84353	84362		662	p5	(TGCAT)2	10	84403	84412		667	p5	(TGCAT)2	10	84661	84670		579	p5	(TGCAT)2	10	81463	81472
654	p5	(TTTAT)2	10	84509	84518		663	p5	(TTTAT)2	10	84559	84568		668	p5	(TTTAT)2	10	84817	84826		580	p5	(TTTAT)2	10	81619	81628
655	p1	(T)20	20	84584	84603		664	p1	(T)19	19	84634	84652		669	p1	(T)20	20	84892	84911		581	p1	(T)18	18	81694	81711
656	p5	(AAATC)2	10	84712	84721		665	p5	(AAATC)2	10	84761	84770		670	p5	(AAATC)2	10	85020	85029		582	p5	(AAATC)2	10	81820	81829
657	p1	(A)11	11	84774	84784		666	p1	(A)11	11	84823	84833		671	p1	(A)11	11	85082	85092		583	p1	(A)10	10	81882	81891
658	p1	(A)12	12	84886	84897		667	p1	(A)12	12	84935	84946		672	p1	(A)12	12	85194	85205		584	p1	(A)10	10	81993	82002
659	p1	(A)13	13	85280	85292		668	p1	(A)13	13	85329	85341		673	p1	(A)13	13	85588	85600		585	p1	(A)12	12	82385	82396
660	p1	(T)18	18	85479	85496		669	p1	(T)17	17	85528	85544		674	p1	(T)19	19	85787	85805		586	p1	(T)14	14	82583	82596
661	p5	(CGATG)2	10	85530	85539		670	p5	(CGATG)2	10	85578	85587		675	p5	(CGATG)2	10	85839	85848		587	p5	(CGATG)2	10	82630	82639
662	p5	(TTATA)2	10	85597	85606		671	p5	(TTATA)2	10	85645	85654		676	p5	(TTATA)2	10	85906	85915		588	p5	(TTATA)2	10	82697	82706
663	p6	(ATATGG)2	12	85616	85627		672	p6	(ATATGG)2	12	85671	85682		677	p6	(ATATGG)2	12	85925	85936		589	p6	(ATATGG)2	12	82716	82727
664	p6	(ATATGG)2	12	85631	85642		673	p6	(ATATGG)2	12	85686	85697		678	p6	(ATATGG)2	12	85940	85951		590	p6	(ATATGG)2	12	82731	82742
665	p5	(ATTAA)2	10	86000	86009		674	p5	(ATTAA)2	10	86055	86064									591	p5	(ATTAA)2	10	83100	83109
666	p1	(A)10	10	86222	86231		675	p1	(A)11	11	86277	86287		679	p1	(A)11	11	86531	86541		592	p1	(A)11	11	83322	83332
667	p5	(ATAGA)2	10	86272	86281		676	p5	(ATAGA)2	10	86328	86337		680	p5	(ATAGA)2	10	86582	86591		593	p5	(ATAGA)2	10	83373	83382
668	p5	(CATAG)2	10	86386	86395		677	p5	(CATAG)2	10	86442	86451		681	p5	(CATAG)2	10	86696	86705		594	p5	(CATAG)2	10	83487	83496
669	p6	(AGACGG)2	12	87571	87582		678	p6	(AGACGG)2	12	87627	87638		682	p6	(AGACGG)2	12	87881	87892		595	p6	(AGACGG)2	12	84672	84683
670	p5	(TTTGC)2	10	87830	87839		679	p5	(TTTGC)2	10	87886	87895		683	p5	(TTTGC)2	10	88140	88149		596	p5	(TTTGC)2	10	84931	84940
671	p1	(T)11	11	88017	88027		680	p1	(T)11	11	88073	88083		684	p1	(T)11	11	88327	88337		597	p1	(T)11	11	85118	85128
672	p5	(ATAGG)2	10	88046	88055		681	p5	(ATAGG)2	10	88102	88111		685	p5	(ATAGG)2	10	88356	88365		598	p5	(ATAGG)2	10	85147	85156
673	c*	(CAATAT)2(AATAT)2*	17	88318	88334		682	c*	(CAATAT)2(AATAT)2*	17	88374	88390		686	c*	(CAATAT)2(AATAT)2*	17	88628	88644		599	c*	(CAATAT)2(AATAT)2*	17	85419	85435
674	p5	(CTACG)2	10	88515	88524		683	p5	(CTACG)2	10	88571	88580		687	p5	(CTACG)2	10	88825	88834		600	p5	(CTACG)2	10	85616	85625
675	p5	(AAACA)2	10	89379	89388		684	p5	(AAACA)2	10	89435	89444		688	p5	(AAACA)2	10	89689	89698		601	p5	(AAACA)2	10	86479	86488
676	p5	(GAGAA)2	10	89410	89419		685	p5	(GAGAA)2	10	89466	89475		689	p5	(GAGAA)2	10	89720	89729		602	p5	(GAGAA)2	10	86510	86519
677	p5	(GAAGA)2	10	90500	90509		686	p5	(GAAGA)2	10	90556	90565		690	p5	(GAAGA)2	10	90810	90819		603	p5	(GAAGA)2	10	87600	87609
678	p6	(ATGTAA)2	12	90897	90908		687	p6	(ATGTAA)2	12	90953	90964		691	p6	(ATGTAA)2	12	91207	91218		604	p6	(ATGTAA)2	12	87997	88008
679	p6	(TGATCA)2	12	90973	90984		688	p6	(TGATCA)2	12	91029	91040		692	p6	(TGATCA)2	12	91283	91294		605	p6	(TGATCA)2	12	88073	88084
680	p5	(ATTTT)2	10	91122	91131		689	p5	(ATTTT)2	10	91178	91187		693	p5	(ATTTT)2	10	91432	91441		606	p5	(ATTTT)2	10	88222	88231
681	p5	(TATGG)2	10	91133	91142		690	p5	(TATGG)2	10	91189	91198		694	p5	(TATGG)2	10	91443	91452		607	p5	(TATGG)2	10	88233	88242
682	p5	(ATGTA)2	10	91386	91395		691	p5	(ATGTA)2	10	91442	91451		695	p5	(ATGTA)2	10	91696	91705		608	p5	(ATGTA)2	10	88486	88495
683	p5	(AAATA)2	10	91737	91746		692	p5	(AAATA)2	10	91793	91802		696	p5	(AAATA)2	10	92047	92056		609	p5	(AAATA)2	10	88837	88846
684	p5	(CTTTA)2	10	91877	91886		693	p5	(CTTTA)2	10	91933	91942		697	p5	(CTTTA)2	10	92187	92196		610	p5	(CTTTA)2	10	88977	88986
685	p5	(CTTTA)2	10	91889	91898		694	p5	(CTTTA)2	10	91945	91954		698	p5	(CTTTA)2	10	92199	92208		611	p5	(CTTTA)2	10	88989	88998
686	c*	(TTATA)2(ATTATA)2*(ATTAT)2*	20	91900	91919		695	c*	(TTATA)2(ATTATA)2*(ATTAT)2*	20	91956	91975		699	c*	(TTATA)2(ATTATA)2*(ATTAT)2*	20	92210	92229		612	c*	(TTATA)2(ATTATA)3*(ATTAT)2*	26	89011	89036
687	c*	(TAT)4(TATTA)2*	16	91921	91936		696	c*	(TAT)4(TATTA)2*	16	91977	91992		700	c*	(TAT)4(TATTA)2*	16	92231	92246		613	c*	(TAT)4(TATTA)2*	16	89038	89053
688	c*	(TATTA)2(TAT)4*	17	91938	91954		697	c*	(TATTA)2(TAT)4*	17	91994	92010		701	c*	(TATTA)2(TAT)4*	17	92248	92264		614	c*	(TTATAA)2(ATTAT)2*	21	89059	89079
689	p6	(TATAAA)2	12	91967	91978		698	p6	(TATAAA)2	12	92023	92034		702	p6	(TATAAA)2	12	92277	92288
690	p6	(TATAAA)2	12	91989	92000		699	p6	(TATAAA)2	12	92045	92056		703	p6	(TATAAA)2	12	92299	92310
691	p3	(TAT)4	12	92011	92022		700	p3	(TAT)4	12	92067	92078		704	p3	(TAT)4	12	92321	92332
																					615	c*	(TAT)4(TATTA)2*	16	89081	89096
																					616	c*	(TATTA)2(TAT)4*	17	89098	89114
																					617	c*	(TAT)4(TATTA)2*	16	89133	89148
692	p6	(TATAAA)2	12	92041	92052		701	p6	(TATAAA)2	12	92097	92108		705	p6	(TATAAA)2	12	92351	92362		618	p6	(TATAAA)2	12	89157	89168
693	c*	(ATATT)2(TTATAT)2*	15	92083	92097		702	c*	(ATATT)2(TTATAT)2*	15	92139	92153		706	c*	(ATATT)2(TTATAT)2*	15	92373	92387		619	c*	(ATATT)2(TTATAT)2*	15	89179	89193
694	p5	(TATAT)2	10	92109	92118		703	p5	(TATAT)2	10	92165	92174		707	p5	(TATAT)2	10	92399	92408		620	p5	(TATAT)2	10	89205	89214
695	p5	(TATAT)2	10	92169	92178		704	p5	(TATAT)2	10	92225	92234		708	p5	(TATAT)2	10	92459	92468		621	p5	(TATAT)2	10	89266	89275
696	p5	(TATAT)2	10	92198	92207		705	p5	(TATAT)2	10	92254	92263		709	p5	(TATAT)2	10	92488	92497
697	p5	(TATTA)2	10	92217	92226		706	p5	(TATTA)2	10	92273	92282
698	c*	(TATTA)2(ATTATA)2*	21	92234	92254		707	c*	(TATTA)2(ATTATA)2*	21	92290	92310		710	c*	(TATTA)2(ATTATA)2*	21	92507	92527		622	c*	(TATTA)2(ATTATA)2*	21	89285	89305
699	p6	(ATATAA)3	18	92258	92275		708	p6	(ATATAA)3	18	92314	92331		711	p6	(ATATAA)3	18	92531	92548		623	p6	(ATATAA)3	18	89309	89326
700	p5	(AAATT)2	10	92297	92306		709	p5	(AAATT)2	10	92353	92362		712	p5	(AAATT)2	10	92570	92579		624	p5	(AAATT)2	10	89348	89357
701	c*	(ATAAA)2(AAATAT)2*	20	92318	92337		710	c*	(ATAAA)2(AAATAT)2*	20	92374	92393		713	c*	(ATAAA)2(AAATAT)2*	20	92591	92610		625	c*	(ATAAA)2(AAATAT)2*	20	89369	89388
702	c*	(ATTATA)2(ATTAT)3*	21	92343	92363		711	c*	(ATTATA)2(ATTAT)3*	21	92399	92419		714	c*	(ATTATA)2(ATTAT)3*	21	92616	92636		626	c*	(ATTATA)2(ATTAT)3*	21	89394	89414
703	p3	(TAT)4	12	92365	92376		712	p3	(TAT)4	12	92421	92432		715	p3	(TAT)4	12	92638	92649		627	p3	(TAT)4	12	89416	89427
704	p6	(ATTATA)2	12	92379	92390		713	p6	(ATTATA)2	12	92435	92446		716	p6	(ATTATA)2	12	92652	92663		628	p6	(ATTATA)2	12	89430	89441
705	p5	(ATTAT)2	10	92393	92402		714	p5	(ATTAT)2	10	92449	92458		717	p5	(ATTAT)2	10	92666	92675		629	p5	(ATTAT)2	10	89444	89453
706	c*	(TATAT)3(TAT)4*	26	92408	92433		715	c*	(TATAT)3(TAT)4*	26	92464	92489		718	c*	(TATAT)3(TAT)4*	26	92681	92706		630	p3	(TAT)4	12	89473	89484
707	p5	(ATTAT)2	10	92442	92451		716	p5	(ATTAT)2	10	92498	92507		719	p5	(ATTAT)2	10	92715	92724		631	p5	(ATTAT)2	10	89493	89502
708	p5	(ATTAT)2	10	92463	92472		717	p5	(ATTAT)2	10	92519	92528		720	p5	(ATTAT)2	10	92772	92781		632	p5	(ATTAT)2	10	89550	89559
709	p5	(ATTAT)2	10	92520	92529		718	p5	(ATTAT)2	10	92576	92585
710	c*	(ATTAT)2(ATAAAA)2*(AAAAT)2*	21	92533	92553		719	c*	(ATTAT)2(ATAAAA)2*(AAAAT)2*	21	92589	92609		721	c*	(ATTAT)2(ATAAAA)2*(AAAAT)2*	21	92785	92805		633	c*	(ATAAAA)3(AAAAT)2*	19	89571	89589
711	p5	(AAGGT)2	10	92849	92858		720	p5	(AAGGT)2	10	92905	92914		722	p5	(AAGGT)2	10	93101	93110		634	p5	(AAGGT)2	10	89885	89894
712	p6	(CATTCC)2	12	93017	93028		721	p6	(CATTCC)2	12	93073	93084		723	p6	(CATTCC)2	12	93269	93280		635	p6	(CATTCC)2	12	90053	90064
713	p5	(ATATT)2	10	93601	93610		722	p5	(ATATT)2	10	93657	93666		724	p5	(ATATT)2	10	93853	93862		636	p5	(ATATT)2	10	90637	90646
714	p5	(CCTTA)2	10	94323	94332		723	p5	(CCTTA)2	10	94379	94388		725	p5	(CCTTA)2	10	94575	94584		637	p5	(CCTTA)2	10	91359	91368
715	p5	(TGATA)2	10	94703	94712		724	p5	(TGATA)2	10	94759	94768		726	p5	(TGATA)2	10	94955	94964		638	p5	(TGATA)2	10	91739	91748
716	c*	(ATCAT)2(T)10*	19	95733	95751		725	c*	(ATCAT)2(T)10*	19	95789	95807		727	c*	(ATCAT)2(T)11*	20	95985	96004		639	c*	(ATCAT)2(T)10*	19	92768	92786
717	p5	(TCTTT)2	10	95753	95762		726	p5	(TCTTT)2	10	95809	95818		728	p5	(TCTTT)2	10	96006	96015		640	p5	(TCTTT)2	10	92788	92797
718	p5	(GAATA)2	10	96377	96386		727	p5	(GAATA)2	10	96433	96442		729	p5	(GAATA)2	10	96630	96639		641	p5	(GAATA)2	10	93412	93421
719	p5	(CTGAA)2	10	96788	96797		728	p5	(CTGAA)2	10	96844	96853		730	p5	(CTGAA)2	10	97041	97050		642	p5	(CTGAA)2	10	93823	93832
720	p6	(TAGAAT)2	12	97327	97338		729	p6	(TAGAAT)2	12	97383	97394		731	p6	(TAGAAT)2	12	97580	97591		643	p6	(TAGAAT)2	12	94362	94373
721	p5	(TTTGA)2	10	98047	98056		730	p5	(TTTGA)2	10	98103	98112		732	p5	(TTTGA)2	10	98300	98309		644	p5	(TTTGA)2	10	95082	95091
722	p5	(CAATA)2	10	98199	98208		731	p5	(CAATA)2	10	98255	98264		733	p5	(CAATA)2	10	98452	98461		645	p5	(CAATA)2	10	95234	95243
723	p6	(CTCGAG)2	12	98249	98260		732	p6	(CTCGAG)2	12	98305	98316		734	p6	(CTCGAG)2	12	98502	98513		646	p6	(CTCGAG)2	12	95284	95295
724	p6	(GTAAAG)2	12	98940	98951		733	p6	(GTAAAG)2	12	98996	99007		735	p6	(GTAAAG)2	12	99193	99204		647	p6	(GTAAAG)2	12	95975	95986
725	p5	(TATGT)2	10	99394	99403		734	p5	(TATGT)2	10	99450	99459		736	p5	(TATGT)2	10	99647	99656		648	p5	(TATGT)2	10	96429	96438
726	p5	(AAATG)2	10	99809	99818		735	p5	(AAATG)2	10	99865	99874		737	p5	(AAATG)2	10	100062	100071		649	p5	(AAATG)2	10	96844	96853
727	p5	(TGGAT)2	10	100407	100416		736	p5	(TGGAT)2	10	100463	100472		738	p5	(TGGAT)2	10	100660	100669		650	p5	(TGGAT)2	10	97442	97451
728	p5	(GAATA)2	10	100529	100538		737	p5	(GAATA)2	10	100585	100594		739	p5	(GAATA)2	10	100782	100791		651	p5	(GAATA)2	10	97564	97573
729	p5	(GAATA)2	10	100550	100559		738	p5	(GAATA)2	10	100606	100615		740	p5	(GAATA)2	10	100803	100812		652	p5	(GAATA)2	10	97585	97594
730	p5	(ATACC)2	10	100883	100892		739	p5	(ATACC)2	10	100939	100948		741	p5	(ATACC)2	10	101136	101145		653	p5	(ATACC)2	10	97918	97927
731	p5	(TGAAA)2	10	101087	101096		740	p5	(TGAAA)2	10	101143	101152		742	p5	(TGAAA)2	10	101340	101349		654	p5	(TGAAA)2	10	98122	98131
732	p5	(GATCC)2	10	101815	101824		741	p5	(GATCC)2	10	101871	101880		743	p5	(GATCC)2	10	102068	102077		655	p5	(GATCC)2	10	98850	98859
733	p5	(ATTTG)2	10	102188	102197		742	p5	(ATTTG)2	10	102244	102253		744	p5	(ATTTG)2	10	102441	102450		656	p5	(ATTTG)2	10	99223	99232
734	p6	(CCAAAA)2	12	103240	103251		743	p6	(CCAAAA)2	12	103296	103307		745	p6	(CCAAAA)2	12	103493	103504		657	p6	(CCAAAA)2	12	100275	100286
735	p5	(CGATC)2	10	104524	104533		744	p5	(CGATC)2	10	104580	104589		746	p5	(CGATC)2	10	104777	104786		658	p5	(CGATC)2	10	101559	101568
736	p5	(TTCAA)2	10	104689	104698		745	p5	(TTCAA)2	10	104745	104754		747	p5	(TTCAA)2	10	104942	104951		659	p5	(TTCAA)2	10	101724	101733
737	p5	(CTGAA)2	10	105389	105398		746	p5	(CTGAA)2	10	105445	105454		748	p5	(CTGAA)2	10	105642	105651		660	p5	(CTGAA)2	10	102424	102433
738	p6	(AAGAAA)2	12	105666	105677		747	p6	(AAGAAA)2	12	105722	105733		749	p6	(AAGAAA)2	12	105919	105930		661	p6	(AAGAAA)2	12	102701	102712
739	p5	(GATTG)2	10	105691	105700		748	p5	(GATTG)2	10	105747	105756		750	p5	(GATTG)2	10	105944	105953		662	p5	(GATTG)2	10	102726	102735
740	p6	(AATTAG)2	12	106349	106360		749	p6	(AATTAG)2	12	106405	106416		751	p6	(AATTAG)2	12	106602	106613		663	p6	(AATTAG)2	12	103384	103395
741	p5	(TAAAT)2	10	106557	106566		750	p5	(TAAAT)2	10	106613	106622		752	p5	(TAAAT)2	10	106810	106819		664	p5	(TAAAT)2	10	103592	103601
742	p5	(GAAAA)2	10	106651	106660		751	p5	(GAAAA)2	10	106707	106716		753	p5	(GAAAA)2	10	106904	106913		665	p5	(GAAAA)2	10	103686	103695
743	p6	(TAGAAG)2	12	107156	107167		752	p6	(TAGAAG)2	12	107212	107223		754	p6	(TAGAAG)2	12	107409	107420		666	p6	(TAGAAG)2	12	104191	104202
744	p6	(AGAAGG)2	12	107340	107351		753	p6	(AGAAGG)2	12	107396	107407		755	p6	(AGAAGG)2	12	107593	107604		667	p6	(AGAAGG)2	12	104375	104386
745	p5	(ATGAA)2	10	107996	108005		754	p5	(ATGAA)2	10	108052	108061		756	p5	(ATGAA)2	10	108249	108258		668	p5	(ATGAA)2	10	105031	105040
746	p1	(A)11	11	108333	108343		755	p1	(A)11	11	108389	108399		757	p1	(A)11	11	108586	108596		669	p1	(A)11	11	105368	105378
747	p5	(AAATA)2	10	108413	108422		756	p5	(AAATA)2	10	108469	108478		758	p5	(AAATA)2	10	108666	108675		670	p5	(AAATA)2	10	105448	105457
748	c*	(CTAATT)2(TTGTT)3*	25	108511	108535		757	c*	(CTAATT)2(TTGTT)3*	25	108567	108591		759	c*	(CTAATT)2(TTGTT)3*	25	108764	108788		671	c*	(CTAATT)2(TTGTT)3*	25	105546	105570
749	p5	(ACCCG)2	10	108672	108681		758	p5	(ACCCG)2	10	108728	108737		760	p5	(ACCCG)2	10	108925	108934		672	p5	(ACCCG)2	10	105707	105716
750	p5	(ATGTA)2	10	108754	108763		759	p5	(ATGTA)2	10	108810	108819		761	p5	(ATGTA)2	10	109007	109016		673	p5	(ATGTA)2	10	105789	105798
751	p6	(ATTCCA)2	12	108947	108958		760	p6	(ATTCCA)2	12	109003	109014		762	p6	(ATTCCA)2	12	109200	109211		674	p6	(ATTCCA)2	12	105982	105993
752	p5	(GTCAT)2	10	109261	109270		761	p5	(GTCAT)2	10	109317	109326		763	p5	(GTCAT)2	10	109514	109523		675	p5	(GTCAT)2	10	106296	106305
753	p2	(TA)5	10	109326	109335		762	p2	(TA)5	10	109382	109391		764	p2	(TA)5	10	109579	109588		676	p2	(TA)5	10	106361	106370
754	p6	(TCCTAA)2	12	109393	109404		763	p6	(TCCTAA)2	12	109449	109460		765	p6	(TCCTAA)2	12	109646	109657		677	p6	(TCCTAA)2	12	106428	106439
755	p5	(ACCCT)2	10	109496	109505		764	p5	(ACCCT)2	10	109552	109561		766	p5	(ACCCT)2	10	109749	109758		678	p5	(ACCCT)2	10	106531	106540
756	p6	(GCTGAA)2	12	110369	110380		765	p6	(GCTGAA)2	12	110425	110436		767	p6	(GCTGAA)2	12	110622	110633		679	p6	(GCTGAA)2	12	107404	107415
757	p6	(AGAGTC)2	12	110428	110439		766	p6	(AGAGTC)2	12	110484	110495		768	p6	(AGAGTC)2	12	110681	110692		680	p6	(AGAGTC)2	12	107463	107474
758	p5	(TGATT)2	10	110726	110735		767	p5	(TGATT)2	10	110782	110791		769	p5	(TGATT)2	10	110979	110988		681	p5	(TGATT)2	10	107761	107770
759	p6	(GTCTTG)2	12	111021	111032		768	p6	(GTCTTG)2	12	111077	111088		770	p6	(GTCTTG)2	12	111274	111285		682	p6	(GTCTTG)2	12	108056	108067
760	p6	(TTCTTA)2	12	112049	112060		769	p6	(TTCTTA)2	12	112105	112116		771	p6	(TTCTTA)2	12	112302	112313		683	p6	(TTCTTA)2	12	109084	109095
761	p6	(CTTTTC)2	12	112111	112122		770	p6	(CTTTTC)2	12	112167	112178		772	p6	(CTTTTC)2	12	112364	112375		684	p6	(CTTTTC)2	12	109146	109157
762	p5	(CGAAT)2	10	113163	113172		771	p5	(CGAAT)2	10	113219	113228		773	p5	(CGAAT)2	10	113416	113425		685	p5	(CGAAT)2	10	110198	110207
763	p5	(TCTTT)2	10	113995	114004		772	p5	(TCTTT)2	10	114051	114060		774	p5	(TCTTT)2	10	114248	114257		686	p5	(TCTTT)2	10	111030	111039
764	c	(TTCCTC)2(TATCCC)2	24	114140	114163		773	c	(TTCCTC)2(TATCCC)2	24	114196	114219		775	c	(TTCCTC)2(TATCCC)2	24	114393	114416		687	c	(TTCCTC)2(TATCCC)2	24	111175	111198
765	p5	(TGTTG)2	10	114396	114405		774	p5	(TGTTG)2	10	114452	114461		776	p5	(TGTTG)2	10	114649	114658		688	p5	(TGTTG)2	10	111431	111440
766	p6	(TACTTT)2	12	114499	114510		775	p6	(TACTTT)2	12	114555	114566		777	p6	(TACTTT)2	12	114752	114763		689	p6	(TACTTT)2	12	111534	111545
767	p5	(TATTA)2	10	114526	114535		776	p5	(TATTA)2	10	114582	114591		778	p5	(TATTA)2	10	114779	114788		690	p5	(TATTA)2	10	111561	111570
768	p5	(GCAAT)2	10	114709	114718		777	p5	(GCAAT)2	10	114765	114774		779	p5	(GCAAT)2	10	114962	114971		691	p5	(GCAAT)2	10	111744	111753
769	p6	(TCGGAA)2	12	115019	115030		778	p6	(TCGGAA)2	12	115075	115086		780	p6	(TCGGAA)2	12	115272	115283		692	p6	(TCGGAA)2	12	112054	112065
770	p5	(CGCAA)2	10	115047	115056		779	p5	(CGCAA)2	10	115103	115112		781	p5	(CGCAA)2	10	115300	115309		693	p5	(CGCAA)2	10	112082	112091
771	p5	(TGGAA)2	10	115661	115670		780	p5	(TGGAA)2	10	115717	115726		782	p5	(TGGAA)2	10	115914	115923		694	p5	(TGGAA)2	10	112696	112705
772	p6	(GACACT)2	12	116423	116434		781	p6	(GACACT)2	12	116479	116490		783	p6	(GACACT)2	12	116676	116687		695	p6	(GACACT)2	12	113458	113469
773	p5	(TTTCC)2	10	118075	118084		782	p5	(TTTCC)2	10	118131	118140		784	p5	(TTTCC)2	10	118328	118337		696	p5	(TTTCC)2	10	115110	115119
774	p5	(ACCAA)2	10	119173	119182		783	p5	(ACCAA)2	10	119229	119238		785	p5	(ACCAA)2	10	119426	119435		697	p5	(ACCAA)2	10	116208	116217
775	p6	(GAAGCG)2	12	120878	120889		784	p6	(GAAGCG)2	12	120934	120945		786	p6	(GAAGCG)2	12	121131	121142		698	p6	(GAAGCG)2	12	117913	117924
776	p5	(CAGGG)2	10	121132	121141		785	p5	(CAGGG)2	10	121188	121197		787	p5	(CAGGG)2	10	121385	121394		699	p5	(CAGGG)2	10	118167	118176
777	p5	(GCGGA)2	10	122371	122380		786	p5	(GCGGA)2	10	122427	122436		788	p5	(GCGGA)2	10	122624	122633		700	p5	(GCGGA)2	10	119406	119415
778	p6	(TCTTAT)2	12	122997	123008		787	p6	(TCTTAT)2	12	123053	123064		789	p6	(TCTTAT)2	12	123250	123261		701	p6	(TCTTAT)2	12	120032	120043
779	p1	(A)16	16	123025	123040		788	p1	(A)16	16	123081	123096		790	p1	(A)16	16	123278	123293		702	p1	(A)16	16	120060	120075
780	p5	(GAGGA)2	10	123169	123178		789	p5	(GAGGA)2	10	123225	123234		791	p5	(GAGGA)2	10	123422	123431		703	p5	(GAGGA)2	10	120204	120213
781	p5	(AATGG)2	10	123416	123425		790	p5	(AATGG)2	10	123472	123481		792	p5	(AATGG)2	10	123669	123678		704	p5	(AATGG)2	10	120451	120460
782	p5	(AAAAT)2	10	123596	123605		791	p5	(AAAAT)2	10	123652	123661		793	p5	(AAAAT)2	10	123849	123858		705	p5	(AAAAT)2	10	120631	120640
783	p5	(CAGAA)2	10	123800	123809		792	p5	(CAGAA)2	10	123856	123865		794	p5	(CAGAA)2	10	124053	124062		706	p5	(CAGAA)2	10	120835	120844
784	p5	(AGAAA)2	10	124289	124298		793	p5	(AGAAA)2	10	124345	124354		795	p5	(AGAAA)2	10	124542	124551		707	p5	(AGAAA)2	10	121324	121333
785	p5	(CATTT)2	10	124752	124761		794	p5	(CATTT)2	10	124808	124817		796	p5	(CATTT)2	10	125005	125014		708	p5	(CATTT)2	10	121787	121796
786	p5	(GAAAT)2	10	125392	125401		795	p5	(GAAAT)2	10	125448	125457		797	p5	(GAAAT)2	10	125645	125654		709	p5	(GAAAT)2	10	122427	122436
787	p6	(GGAAAA)2	12	126170	126181		796	p6	(GGAAAA)2	12	126226	126237		798	p6	(GGAAAA)2	12	126423	126434		710	p6	(GGAAAA)2	12	123205	123216
788	p6	(AATACC)4	24	126261	126284		797	p6	(AATACC)4	24	126317	126340		799	p6	(AATACC)4	24	126514	126537		711	p6	(AATACC)4	24	123296	123319
789	p6	(ATACTC)2	12	126286	126297		798	p6	(ATACTC)2	12	126342	126353		800	p6	(ATACTC)2	12	126539	126550		712	p6	(ATACTC)2	12	123321	123332
790	p1	(T)10	10	126480	126489		799	p1	(T)10	10	126536	126545		801	p1	(T)10	10	126733	126742		713	p1	(T)10	10	123515	123524
791	p6	(ATAGCA)2	12	126639	126650		800	p6	(ATAGCA)2	12	126695	126706		802	p6	(ATAGCA)2	12	126892	126903		714	p6	(ATAGCA)2	12	123674	123685
792	p5	(TATTG)2	10	126728	126737		801	p5	(TATTG)2	10	126784	126793		803	p5	(TATTG)2	10	126981	126990		715	p5	(TATTG)2	10	123763	123772
793	p6	(TGCAAA)2	12	127253	127264		802	p6	(TGCAAA)2	12	127309	127320		804	p6	(TGCAAA)2	12	127506	127517		716	p6	(TGCAAA)2	12	124288	124299
794	p6	(TTCTAA)2	12	127826	127837		803	p6	(TTCTAA)2	12	127882	127893		805	p6	(TTCTAA)2	12	128079	128090		717	p6	(TTCTAA)2	12	124861	124872
795	p4	(GAAT)3	12	128056	128067		804	p4	(GAAT)3	12	128112	128123		806	p4	(GAAT)3	12	128309	128320		718	p4	(GAAT)3	12	125091	125102
796	p6	(GAAAAA)2	12	128208	128219		805	p6	(GAAAAA)2	12	128264	128275		807	p6	(GAAAAA)2	12	128461	128472		719	p6	(GAAAAA)2	12	125243	125254
797	p6	(CATATA)2	12	128404	128415		806	p6	(CATATA)2	12	128460	128471		808	p6	(CATATA)2	12	128657	128668		720	p6	(CATATA)2	12	125439	125450
798	p1	(A)12	12	128709	128720		807	p1	(A)12	12	128765	128776		809	p1	(A)12	12	128962	128973		721	p1	(A)12	12	125744	125755
799	p6	(AATCGA)2	12	128973	128984		808	p6	(AATCGA)2	12	129029	129040		810	p6	(AATCGA)2	12	129226	129237		722	p6	(AATCGA)2	12	126008	126019
800	p5	(ATTCA)2	10	129771	129780		809	p5	(ATTCA)2	10	129827	129836		811	p5	(ATTCA)2	10	130024	130033		723	p5	(ATTCA)2	10	126806	126815
801	c	(TTTCT)2(TAATT)2	20	130123	130142		810	c	(TTTCT)2(TAATT)2	20	130179	130198		812	c	(TTTCT)2(TAATT)2	20	130376	130395		724	c	(TTTCT)2(TAATT)2	20	127158	127177
802	p3	(ATT)4	12	130232	130243		811	p3	(ATT)4	12	130288	130299		813	p3	(ATT)4	12	130485	130496		725	p3	(ATT)4	12	127267	127278
803	c*	(GAAAA)2(A)11*	17	130270	130286		812	c*	(GAAAA)2(A)11*	17	130326	130342		814	c*	(GAAAA)2(A)11*	17	130523	130539		726	c*	(GAAAA)2(A)11*	17	127305	127321
804	p5	(GAATG)2	10	131586	131595		813	p5	(GAATG)2	10	131642	131651		815	p5	(GAATG)2	10	131839	131848		727	p5	(GAATG)2	10	128621	128630
805	p5	(AACTA)2	10	132102	132111		814	p5	(AACTA)2	10	132158	132167		816	p5	(AACTA)2	10	132355	132364		728	p5	(AACTA)2	10	129137	129146
806	p5	(CTTTT)2	10	132449	132458		815	p5	(CTTTT)2	10	132505	132514		817	p5	(CTTTT)2	10	132702	132711		729	p5	(CTTTT)2	10	129484	129493
807	p6	(TATCTT)2	12	132506	132517		816	p6	(TATCTT)2	12	132562	132573		818	p6	(TATCTT)2	12	132759	132770		730	p6	(TATCTT)2	12	129541	129552
808	p5	(AAACA)2	10	132567	132576		817	p5	(AAACA)2	10	132623	132632		819	p5	(AAACA)2	10	132820	132829		731	p5	(AAACA)2	10	129602	129611
809	p5	(TTTTA)2	10	132738	132747		818	p5	(TTTTA)2	10	132794	132803		820	p5	(TTTTA)2	10	132991	133000		732	p5	(TTTTA)2	10	129773	129782
810	p6	(TGATTC)2	12	132919	132930		819	p6	(TGATTC)2	12	132975	132986		821	p6	(TGATTC)2	12	133172	133183		733	p6	(TGATTC)2	12	129954	129965
811	p1	(T)12	12	132990	133001		820	p1	(T)12	12	133046	133057		822	p1	(T)11	11	133243	133253		734	p1	(T)11	11	130025	130035
812	p5	(TTTCT)2	10	133097	133106		821	p5	(TTTCT)2	10	133153	133162		823	p5	(TTTCT)2	10	133349	133358		735	p5	(TTTCT)2	10	130131	130140
813	p6	(TAGGGA)2	12	133357	133368		822	p6	(TAGGGA)2	12	133413	133424		824	p6	(TAGGGA)2	12	133609	133620		736	p6	(TAGGGA)2	12	130391	130402
814	p6	(CAGAAG)2	12	133679	133690		823	p6	(CAGAAG)2	12	133735	133746		825	p6	(CAGAAG)2	12	133931	133942		737	p6	(CAGAAG)2	12	130713	130724
815	p5	(GAATT)2	10	134548	134557		824	p5	(GAATT)2	10	134604	134613		826	p5	(GAATT)2	10	134800	134809		738	p5	(GAATT)2	10	131582	131591
816	p6	(AAATAA)2	12	134640	134651		825	p6	(AAATAA)2	12	134696	134707		827	p6	(AAATAA)2	12	134892	134903		739	p6	(AAATAA)2	12	131674	131685
817	p6	(AACTAC)2	12	134792	134803		826	p6	(AACTAC)2	12	134848	134859		828	p6	(AACTAC)2	12	135044	135055		740	p6	(AACTAC)2	12	131826	131837
818	p5	(CCACA)2	10	134854	134863		827	p5	(CCACA)2	10	134910	134919		829	p5	(CCACA)2	10	135106	135115		741	p5	(CCACA)2	10	131888	131897
819	p5	(CCAAT)2	10	135085	135094		828	p5	(CCAAT)2	10	135141	135150		830	p5	(CCAAT)2	10	135337	135346		742	p5	(CCAAT)2	10	132119	132128
820	p5	(AAATC)2	10	135552	135561		829	p5	(AAATC)2	10	135608	135617		831	p5	(AAATC)2	10	135804	135813		743	p5	(AAATC)2	10	132586	132595
821	p1	(A)12	12	135571	135582		830	p1	(A)12	12	135627	135638		832	p1	(A)12	12	135823	135834		744	p1	(A)12	12	132605	132616
822	p2	(AT)6	12	135675	135686		831	p2	(AT)6	12	135731	135742		833	p2	(AT)6	12	135927	135938		745	p2	(AT)6	12	132709	132720
823	c	(AT)6(AATAA)2	22	135696	135717		832	c	(AT)6(AATAA)2	22	135752	135773		834	c	(AT)6(AATAA)2	22	135948	135969
																					746	p2	(AT)6	12	132730	132741
824	p5	(AATAA)2	10	135724	135733		833	p5	(AATAA)2	10	135780	135789		835	p5	(AATAA)2	10	135976	135985		747	p5	(AATAA)2	10	132753	132762
825	p5	(ATATA)2	10	135741	135750		834	p5	(ATATA)2	10	135797	135806		836	p5	(ATATA)2	10	135993	136002		748	p5	(AATAA)2	10	132769	132778
826	p5	(ATATA)2	10	135765	135774		835	p5	(ATATA)2	10	135821	135830		837	p5	(ATATA)2	10	136017	136026		749	p5	(ATATA)2	10	132786	132795
827	p5	(ATATA)2	10	135789	135798		836	p5	(ATATA)2	10	135845	135854		838	p5	(ATATA)2	10	136041	136050		750	p5	(ATATA)2	10	132810	132819
828	p5	(ATATA)2	10	135813	135822		837	p5	(ATATA)2	10	135869	135878		839	p5	(ATATA)2	10	136065	136074		751	p5	(ATATA)2	10	132834	132843
829	p5	(ATAAT)2	10	135838	135847		838	p5	(ATAAT)2	10	135894	135903		840	p5	(ATAAT)2	10	136090	136099		752	p5	(ATATA)2	10	132858	132867
830	p5	(ATAAT)2	10	135851	135860		839	p5	(ATAAT)2	10	135907	135916		841	p5	(ATAAT)2	10	136103	136112		753	p5	(ATAAT)2	10	132883	132892
																					754	p5	(ATAAT)2	10	132896	132905
							840	p3	(AAT)4	12	135928	135939		842	p3	(AAT)4	12	136124	136135		755	p3	(AAT)4	12	132917	132928
831	p6	(AGTTTG)2	12	135926	135937		841	p6	(AGTTTG)2	12	135982	135993		843	p6	(AGTTTG)2	12	136178	136189		756	p6	(AGTTTG)2	12	132971	132982
832	p6	(TTATAT)2	12	135944	135955		842	p6	(TTATAT)2	12	136000	136011		844	p6	(TTATAT)2	12	136196	136207		757	p6	(TTATAT)2	12	132989	133000
833	p6	(ATATAG)2	12	136360	136371		843	p6	(ATATAG)2	12	136416	136427		845	p6	(ATATAG)2	12	136612	136623		758	p6	(ATATAG)2	12	133405	133416
834	p6	(AATTAG)2	12	136423	136434		844	p6	(AATTAG)2	12	136479	136490		846	p6	(AATTAG)2	12	136675	136686		759	p6	(AATTAG)2	12	133468	133479
835	p5	(ATTCC)2	10	136998	137007		845	p5	(ATTCC)2	10	137054	137063		847	p5	(ATTCC)2	10	137250	137259		760	p5	(ATTCC)2	10	134042	134051
836	p5	(ATATT)2	10	137682	137691		846	p5	(ATATT)2	10	137738	137747		848	p5	(ATATT)2	10	137934	137943		761	p5	(ATATT)2	10	134726	134735
837	p6	(GGTATT)2	12	138468	138479		847	p6	(GGTATT)2	12	138524	138535		849	p6	(GGTATT)2	12	138720	138731		762	p6	(GGTATT)2	12	135512	135523
838	p6	(GAATTG)2	12	138628	138639		848	p6	(GAATTG)2	12	138684	138695		850	p6	(GAATTG)2	12	138880	138891		763	p6	(GAATTG)2	12	135672	135683
839	p5	(AACCA)2	10	138667	138676		849	p5	(AACCA)2	10	138723	138732		851	p5	(AACCA)2	10	138919	138928		764	p5	(AACCA)2	10	135711	135720
840	p5	(TATGT)2	10	138709	138718		850	p5	(TATGT)2	10	138765	138774		852	p5	(TATGT)2	10	138961	138970		765	p5	(TATGT)2	10	135753	135762
841	p5	(CTTAA)2	10	138772	138781		851	p5	(CTTAA)2	10	138828	138837		853	p5	(CTTAA)2	10	139024	139033		766	p5	(CTTAA)2	10	135816	135825
842	p1	(A)12	12	139733	139744		852	p1	(A)12	12	139789	139800		854	p1	(A)12	12	139985	139996		767	p1	(A)12	12	136777	136788
843	c*	(CTTAAA)2(TAAAA)2*	18	139750	139767		853	c*	(CTTAAA)2(TAAAA)2*	18	139806	139823		855	c*	(CTTAAA)2(TAAAA)2*	18	140002	140019		768	c*	(CTTAAA)2(TAAAA)2*	18	136794	136811
844	p5	(CATAA)2	10	139809	139818		854	p5	(CATAA)2	10	139865	139874		856	p5	(CATAA)2	10	140061	140070		769	p5	(CATAA)2	10	136853	136862
845	p5	(AAATA)2	10	140048	140057		855	p5	(AAATA)2	10	140104	140113		857	p5	(AAATA)2	10	140300	140309		770	p5	(AAATA)2	10	137092	137101
846	p5	(ACTTA)2	10	140075	140084		856	p5	(ACTTA)2	10	140131	140140		858	p5	(ACTTA)2	10	140327	140336		771	p5	(ACTTA)2	10	137119	137128
847	c*	(ATTTT)2(T)13*	19	140200	140218		857	c*	(ATTTT)2(T)13*	19	140256	140274		859	c*	(ATTTT)2(T)13*	19	140452	140470		772	c*	(ATTTT)2(T)12*	18	137244	137261
																					773	c*	(ATGAA)2(A)11*(AAAAT)3*(TAGTTT)2*	41	137311	137351
848	p5	(ATGAA)2	10	140268	140277		858	c*	(ATGAA)2(A)10*(AAAAT)3*	29	140324	140352		860	p5	(ATGAA)2	10	140520	140529
849	p5	(AAAAT)3	15	140281	140295									861	p5	(AAAAT)3	15	140533	140547
850	p1	(T)11	11	140722	140732		859	p1	(T)11	11	140779	140789		862	p1	(T)11	11	140974	140984		774	p1	(T)11	11	137767	137777
851	p5	(TATAA)2	10	140829	140838		860	p5	(TATAA)2	10	140886	140895		863	p5	(TATAA)2	10	141081	141090		775	p5	(TATAA)2	10	137874	137883
852	p1	(T)15	15	140874	140888		861	p1	(T)15	15	140931	140945		864	p1	(T)15	15	141126	141140		776	p1	(T)19	19	137919	137937
853	p5	(TCCTA)2	10	140983	140992		862	p5	(TCCTA)2	10	141040	141049		865	p5	(TCCTA)2	10	141235	141244		777	p5	(TCCTA)2	10	138032	138041
854	p5	(TTTTG)2	10	141101	141110		863	p5	(TTTTG)2	10	141158	141167		866	p5	(TTTTG)2	10	141353	141362		778	p5	(TTTTG)2	10	138150	138159
855	p1	(A)10	10	141429	141438		864	p1	(A)10	10	141486	141495		867	p1	(A)10	10	141681	141690		779	p1	(A)10	10	138478	138487
856	p5	(AAAAG)2	10	141449	141458		865	p5	(AAAAG)2	10	141506	141515		868	p5	(AAAAG)2	10	141701	141710		780	p5	(AAAAG)2	10	138498	138507
857	p5	(TCTAT)2	10	141506	141515		866	p5	(TCTAT)2	10	141563	141572		869	p5	(TCTAT)2	10	141758	141767		781	p5	(TCTAT)2	10	138555	138564
858	p5	(AATCG)2	10	141600	141609		867	p5	(AATCG)2	10	141657	141666		870	p5	(AATCG)2	10	141852	141861		782	p5	(AATCG)2	10	138649	138658
859	p1	(A)10	10	141636	141645		868	p1	(A)10	10	141693	141702									783	p1	(A)10	10	138685	138694
860	c*	(TA)12(TATAT)2*	30	141671	141700		869	c*	(TA)12(TATAT)2*	30	141728	141757		871	c*	(TA)12(TATAT)2*	30	141923	141952		784	c*	(TA)12(TATAT)2*	30	138720	138749
861	p5	(ATAAG)2	10	141727	141736		870	p5	(ATAAG)2	10	141784	141793		872	p5	(ATAAG)2	10	141979	141988		785	p5	(ATAAG)2	10	138776	138785
862	p6	(TACCTA)2	12	141751	141762		871	p6	(TACCTA)2	12	141808	141819		873	p6	(TACCTA)2	12	142003	142014		786	p6	(TACCTA)2	12	138800	138811
863	p6	(AAACAC)2	12	141771	141782		872	p6	(AAACAC)2	12	141828	141839		874	p6	(AAACAC)2	12	142023	142034		787	p6	(AAACAC)2	12	138820	138831
864	p5	(CTTTT)2	10	141991	142000		873	p5	(CTTTT)2	10	142048	142057		875	p5	(CTTTT)2	10	142243	142252		788	p5	(CTTTT)2	10	139040	139049
865	p5	(AATAA)2	10	142044	142053		874	p5	(AATAA)2	10	142101	142110		876	p5	(AATAA)2	10	142296	142305		789	p5	(AATAA)2	10	139093	139102
866	p5	(TGGAT)2	10	142147	142156		875	p5	(TGGAT)2	10	142204	142213		877	p5	(TGGAT)2	10	142399	142408		790	p5	(TGGAT)2	10	139196	139205
867	p5	(TCTGT)2	10	142199	142208		876	p5	(TCTGT)2	10	142256	142265		878	p5	(TCTGT)2	10	142451	142460		791	p5	(TCTGT)2	10	139248	139257
868	p6	(ATATTG)2	12	142383	142394		877	p6	(ATATTG)2	12	142440	142451		879	p6	(ATATTG)2	12	142635	142646		792	p6	(ATATTG)2	12	139432	139443
869	c*	(TATTGC)2(ATTGC)2*	17	142408	142424		878	c*	(TATTGC)2(ATTGC)2*	17	142465	142481		880	c*	(TATTGC)2(ATTGC)2*	17	142660	142676		793	c*	(TATTGC)2(ATTGC)2*	17	139457	139473
870	p6	(AAAAAG)2	12	142474	142485		879	p6	(AAAAAG)2	12	142531	142542		881	p6	(AAAAAG)2	12	142726	142737		794	p6	(AAAAAG)2	12	139523	139534
871	p6	(GGATCC)2	12	143575	143586		880	p6	(GGATCC)2	12	143632	143643		882	p6	(GGATCC)2	12	143827	143838		795	p6	(GGATCC)2	12	140624	140635
872	p5	(ATTTT)2	10	143969	143978		881	p5	(ATTTT)2	10	144026	144035		883	p5	(ATTTT)2	10	144221	144230		796	p5	(ATTTT)2	10	141018	141027
873	p5	(AATAT)2	10	144451	144460		882	p5	(AATAT)2	10	144508	144517		884	p5	(AATAT)2	10	144703	144712		797	p5	(AATAT)2	10	141500	141509
874	p5	(TATAT)2	10	144946	144955		883	p5	(TATAT)2	10	145003	145012		885	p5	(TATAT)2	10	145198	145207		798	p5	(TATAT)2	10	141995	142004
875	p5	(ATAAA)2	10	145427	145436		884	p5	(ATAAA)2	10	145484	145493		886	p5	(ATAAA)2	10	145679	145688		799	p5	(ATAAA)2	10	142476	142485
876	p6	(GGATCC)2	12	145821	145832		885	p6	(GGATCC)2	12	145878	145889		887	p6	(GGATCC)2	12	146073	146084		800	p6	(GGATCC)2	12	142870	142881
877	p6	(CTTTTT)2	12	146922	146933		886	p6	(CTTTTT)2	12	146979	146990		888	p6	(CTTTTT)2	12	147174	147185		801	p6	(CTTTTT)2	12	143971	143982
878	c*	(GCAAT)2(GCAATA)2*	17	146983	146999		887	c*	(GCAAT)2(GCAATA)2*	17	147040	147056		889	c*	(GCAAT)2(GCAATA)2*	17	147235	147251		802	c*	(GCAAT)2(GCAATA)2*	17	144032	144048
879	p6	(ATCAAT)2	12	147011	147022		888	p6	(ATCAAT)2	12	147068	147079		890	p6	(ATCAAT)2	12	147263	147274		803	p6	(ATCAAT)2	12	144060	144071
880	p5	(ACAGA)2	10	147199	147208		889	p5	(ACAGA)2	10	147256	147265		891	p5	(ACAGA)2	10	147451	147460		804	p5	(ACAGA)2	10	144248	144257
881	p5	(ATCCA)2	10	147251	147260		890	p5	(ATCCA)2	10	147308	147317		892	p5	(ATCCA)2	10	147503	147512		805	p5	(ATCCA)2	10	144300	144309
882	p5	(TTATT)2	10	147354	147363		891	p5	(TTATT)2	10	147411	147420		893	p5	(TTATT)2	10	147606	147615		806	p5	(TTATT)2	10	144403	144412
883	p5	(AAAAG)2	10	147407	147416		892	p5	(AAAAG)2	10	147464	147473		894	p5	(AAAAG)2	10	147659	147668		807	p5	(AAAAG)2	10	144456	144465
884	p6	(GTGTTT)2	12	147625	147636		893	p6	(GTGTTT)2	12	147682	147693		895	p6	(GTGTTT)2	12	147877	147888		808	p6	(GTGTTT)2	12	144674	144685
885	p6	(TAGGTA)2	12	147645	147656		894	p6	(TAGGTA)2	12	147702	147713		896	p6	(TAGGTA)2	12	147897	147908		809	p6	(TAGGTA)2	12	144694	144705
886	p5	(TCTTA)2	10	147670	147679		895	p5	(TCTTA)2	10	147727	147736		897	p5	(TCTTA)2	10	147922	147931		810	p5	(TCTTA)2	10	144719	144728
887	c*	(ATATA)2(AT)12*	29	147707	147735		896	c*	(ATATA)2(AT)12*	29	147764	147792		898	c*	(ATATA)2(AT)12*	29	147959	147987		811	c*	(ATATA)2(AT)12*	29	144756	144784
888	p1	(T)10	10	147762	147771		897	p1	(T)10	10	147819	147828									812	p1	(T)10	10	144811	144820
889	p5	(ATTCG)2	10	147795	147804		898	p5	(ATTCG)2	10	147852	147861		899	p5	(ATTCG)2	10	148047	148056		813	p5	(ATTCG)2	10	144844	144853
890	p5	(ATAGA)2	10	147892	147901		899	p5	(ATAGA)2	10	147949	147958		900	p5	(ATAGA)2	10	148144	148153		814	p5	(ATAGA)2	10	144941	144950
891	p5	(CTTTT)2	10	147949	147958		900	p5	(CTTTT)2	10	148006	148015		901	p5	(CTTTT)2	10	148201	148210		815	p5	(CTTTT)2	10	144998	145007
892	p1	(T)10	10	147969	147978		901	p1	(T)10	10	148026	148035		902	p1	(T)10	10	148221	148230		816	p1	(T)10	10	145018	145027
893	p5	(AAACA)2	10	148294	148303		902	p5	(AAACA)2	10	148351	148360		903	p5	(AAACA)2	10	148546	148555		817	p5	(AAACA)2	10	145343	145352
894	p5	(GATAG)2	10	148413	148422		903	p5	(GATAG)2	10	148470	148479		904	p5	(GATAG)2	10	148665	148674		818	p5	(GATAG)2	10	145462	145471
895	p1	(A)15	15	148519	148533		904	p1	(A)15	15	148576	148590		905	p1	(A)15	15	148771	148785		819	p1	(A)19	19	145568	145586
896	p5	(ATTAT)2	10	148568	148577		905	p5	(ATTAT)2	10	148625	148634		906	p5	(ATTAT)2	10	148820	148829		820	p5	(ATTAT)2	10	145621	145630
897	p1	(A)11	11	148675	148685		906	p1	(A)11	11	148732	148742		907	p1	(A)11	11	148927	148937		821	p1	(A)11	11	145728	145738
898	p5	(TATTT)3	15	149111	149125		907	c*	(TATTT)3(T)10*(TTTCA)2*	29	149168	149196		908	p5	(TATTT)3	15	149363	149377
899	p5	(TTTCA)2	10	149129	149138									909	p5	(TTTCA)2	10	149381	149390
																					822	c*	(AAAACT)2(TATTT)3*(T)11*(TTTCA)2*	41	146153	146193
900	p1	(A)13	13	149189	149201		908	p1	(A)13	13	149247	149259		910	p1	(A)13	13	149441	149453		823	p1	(A)12	12	146244	146255
901	p5	(TAAGT)2	10	149323	149332		909	p5	(TAAGT)2	10	149381	149390		911	p5	(TAAGT)2	10	149575	149584		824	p5	(TAAGT)2	10	146377	146386
902	p5	(TATTT)2	10	149350	149359		910	p5	(TATTT)2	10	149408	149417		912	p5	(TATTT)2	10	149602	149611		825	p5	(TATTT)2	10	146404	146413
903	p5	(TTATG)2	10	149589	149598		911	p5	(TTATG)2	10	149647	149656		913	p5	(TTATG)2	10	149841	149850		826	p5	(TTATG)2	10	146643	146652
904	c*	(TTTTA)2(TTTAAG)2*	18	149640	149657		912	c*	(TTTTA)2(TTTAAG)2*	18	149698	149715		914	c*	(TTTTA)2(TTTAAG)2*	18	149892	149909		827	c*	(TTTTA)2(TTTAAG)2*	18	146694	146711
905	p1	(T)12	12	149663	149674		913	p1	(T)12	12	149721	149732		915	p1	(T)12	12	149915	149926		828	p1	(T)12	12	146717	146728
906	p5	(TTAAG)2	10	150626	150635		914	p5	(TTAAG)2	10	150684	150693		916	p5	(TTAAG)2	10	150878	150887		829	p5	(TTAAG)2	10	147680	147689
907	p5	(ATAAC)2	10	150686	150695		915	p5	(ATAAC)2	10	150744	150753		917	p5	(ATAAC)2	10	150938	150947		830	p5	(ATAAC)2	10	147740	147749
908	p5	(TGGTT)2	10	150731	150740		916	p5	(TGGTT)2	10	150789	150798		918	p5	(TGGTT)2	10	150983	150992		831	p5	(TGGTT)2	10	147785	147794
909	p6	(CAATTC)2	12	150768	150779		917	p6	(CAATTC)2	12	150826	150837		919	p6	(CAATTC)2	12	151020	151031		832	p6	(CAATTC)2	12	147822	147833
910	p6	(AATACC)2	12	150928	150939		918	p6	(AATACC)2	12	150986	150997		920	p6	(AATACC)2	12	151180	151191		833	p6	(AATACC)2	12	147982	147993
911	p5	(AATAT)2	10	151716	151725		919	p5	(AATAT)2	10	151774	151783		921	p5	(AATAT)2	10	151968	151977		834	p5	(AATAT)2	10	148770	148779
912	p5	(GGAAT)2	10	152400	152409		920	p5	(GGAAT)2	10	152458	152467		922	p5	(GGAAT)2	10	152652	152661		835	p5	(GGAAT)2	10	149454	149463
913	p6	(TATGCT)2	12	152963	152974		921	p6	(TATGCT)2	12	153021	153032		923	p6	(TATGCT)2	12	153215	153226		836	p6	(TATGCT)2	12	150016	150027
914	p6	(TATCTA)2	12	153033	153044		922	p6	(TATCTA)2	12	153091	153102		924	p6	(TATCTA)2	12	153285	153296		837	p6	(TATCTA)2	12	150086	150097
915	p6	(AATATA)2	12	153451	153462		923	p6	(AATATA)2	12	153509	153520		925	p6	(AATATA)2	12	153703	153714		838	p6	(AATATA)2	12	150504	150515
916	p6	(TCAAAC)2	12	153469	153480		924	p6	(TCAAAC)2	12	153527	153538		926	p6	(TCAAAC)2	12	153721	153732		839	p6	(TCAAAC)2	12	150522	150533
							925	p3	(TAT)4	12	153581	153592		927	p3	(TAT)4	12	153775	153786		840	p3	(TAT)4	12	150576	150587
917	p5	(TTATT)2	10	153540	153549		926	p5	(TTATT)2	10	153598	153607		928	p5	(TTATT)2	10	153792	153801		841	p5	(TTATT)2	10	150593	150602
918	p5	(TTATT)2	10	153553	153562		927	p5	(TTATT)2	10	153611	153620		929	p5	(TTATT)2	10	153805	153814		842	p5	(TTATT)2	10	150606	150615
919	p5	(TATAT)2	10	153576	153585		928	p5	(TATAT)2	10	153634	153643		930	p5	(TATAT)2	10	153828	153837		843	p5	(TATAT)2	10	150629	150638
920	p5	(TATAT)2	10	153600	153609		929	p5	(TATAT)2	10	153658	153667		931	p5	(TATAT)2	10	153852	153861		844	p5	(TATAT)2	10	150653	150662
921	p5	(TATAT)2	10	153624	153633		930	p5	(TATAT)2	10	153682	153691		932	p5	(TATAT)2	10	153876	153885		845	p5	(TATAT)2	10	150677	150686
922	p5	(TATAT)2	10	153648	153657		931	p5	(TATAT)2	10	153706	153715		933	p5	(TATAT)2	10	153900	153909		846	p5	(TATAT)2	10	150701	150710
923	p5	(TTATT)2	10	153674	153683		932	p5	(TTATT)2	10	153732	153741		934	p5	(TTATT)2	10	153926	153935		847	p5	(TTATT)2	10	150727	150736
924	c*	(TTATT)2(TA)6*	21	153690	153710		933	c*	(TTATT)2(TA)6*	21	153748	153768		935	c*	(TTATT)2(TA)6*	21	153942	153962
																					848	p5	(TTATT)2	10	150743	150752
																					849	p2	(TA)6	12	150763	150774
925	c*	(GTTATA)2(TA)6*	20	153712	153731		934	c*	(GTTATA)2(TA)6*	20	153770	153789		936	c*	(GTTATA)2(TA)6*	20	153964	153983		850	c*	(GTTATA)2(TA)6*	20	150776	150795
926	p1	(T)12	12	153825	153836		935	p1	(T)12	12	153883	153894		937	p1	(T)12	12	154077	154088		851	p1	(T)12	12	150889	150900
927	p5	(ATTTG)2	10	153842	153851		936	p5	(ATTTG)2	10	153900	153909		938	p5	(ATTTG)2	10	154094	154103		852	p5	(ATTTG)2	10	150906	150915
928	p5	(ATTGG)2	10	154313	154322		937	p5	(ATTGG)2	10	154371	154380		939	p5	(ATTGG)2	10	154565	154574		853	p5	(ATTGG)2	10	151377	151386
929	p5	(TGTGG)2	10	154544	154553		938	p5	(TGTGG)2	10	154602	154611		940	p5	(TGTGG)2	10	154796	154805		854	p5	(TGTGG)2	10	151608	151617
930	p6	(GTAGTT)2	12	154604	154615		939	p6	(GTAGTT)2	12	154662	154673		941	p6	(GTAGTT)2	12	154856	154867		855	p6	(GTAGTT)2	12	151668	151679
931	p6	(TTATTT)2	12	154756	154767		940	p6	(TTATTT)2	12	154814	154825		942	p6	(TTATTT)2	12	155008	155019		856	p6	(TTATTT)2	12	151820	151831
932	p5	(AATTC)2	10	154850	154859		941	p5	(AATTC)2	10	154908	154917		943	p5	(AATTC)2	10	155102	155111		857	p5	(AATTC)2	10	151914	151923
933	p6	(CTTCTG)2	12	155717	155728		942	p6	(CTTCTG)2	12	155775	155786		944	p6	(CTTCTG)2	12	155969	155980		858	p6	(CTTCTG)2	12	152781	152792
934	p6	(TCCCTA)2	12	156039	156050		943	p6	(TCCCTA)2	12	156097	156108		945	p6	(TCCCTA)2	12	156291	156302		859	p6	(TCCCTA)2	12	153103	153114
935	p5	(AGAAA)2	10	156301	156310		944	p5	(AGAAA)2	10	156359	156368		946	p5	(AGAAA)2	10	156553	156562		860	p5	(AGAAA)2	10	153365	153374
936	p1	(A)12	12	156406	156417		945	p1	(A)12	12	156464	156475		947	p1	(A)11	11	156658	156668		861	p1	(A)11	11	153470	153480
937	p6	(GAATCA)2	12	156477	156488		946	p6	(GAATCA)2	12	156535	156546		948	p6	(GAATCA)2	12	156728	156739		862	p6	(GAATCA)2	12	153540	153551
938	p5	(ATAAA)2	10	156659	156668		947	p5	(ATAAA)2	10	156717	156726		949	p5	(ATAAA)2	10	156910	156919		863	p5	(ATAAA)2	10	153722	153731
939	p5	(TGTTT)2	10	156831	156840		948	p5	(TGTTT)2	10	156889	156898		950	p5	(TGTTT)2	10	157082	157091		864	p5	(TGTTT)2	10	153894	153903
940	p6	(AAAGAT)2	12	156889	156900		949	p6	(AAAGAT)2	12	156947	156958		951	p6	(AAAGAT)2	12	157140	157151		865	p6	(AAAGAT)2	12	153952	153963
941	p5	(AAAAG)2	10	156949	156958		950	p5	(AAAAG)2	10	157007	157016		952	p5	(AAAAG)2	10	157200	157209		866	p5	(AAAAG)2	10	154012	154021
942	p5	(TAGTT)2	10	157296	157305		951	p5	(TAGTT)2	10	157354	157363		953	p5	(TAGTT)2	10	157547	157556		867	p5	(TAGTT)2	10	154359	154368
943	p5	(CATTC)2	10	157812	157821		952	p5	(CATTC)2	10	157870	157879		954	p5	(CATTC)2	10	158063	158072		868	p5	(CATTC)2	10	154875	154884
944	p1	(T)11	11	159121	159131		953	p1	(T)11	11	159179	159189		955	p1	(T)11	11	159372	159382		869	p1	(T)11	11	156184	156194
945	p3	(AAT)4	12	159164	159175		954	p3	(AAT)4	12	159222	159233		956	p3	(AAT)4	12	159415	159426		870	p3	(AAT)4	12	156227	156238
946	c	(AATTA)2(AGAAA)2	20	159265	159284		955	c	(AATTA)2(AGAAA)2	20	159323	159342		957	c	(AATTA)2(AGAAA)2	20	159516	159535		871	c	(AATTA)2(AGAAA)2	20	156328	156347
947	p5	(TTGAA)2	10	159626	159635		956	p5	(TTGAA)2	10	159684	159693		958	p5	(TTGAA)2	10	159877	159886		872	p5	(TTGAA)2	10	156689	156698
948	p6	(TCGATT)2	12	160423	160434		957	p6	(TCGATT)2	12	160481	160492		959	p6	(TCGATT)2	12	160674	160685		873	p6	(TCGATT)2	12	157486	157497
949	p1	(T)12	12	160687	160698		958	p1	(T)12	12	160745	160756		960	p1	(T)12	12	160938	160949		874	p1	(T)12	12	157750	157761
950	p6	(TATATG)2	12	160992	161003		959	p6	(TATATG)2	12	161050	161061		961	p6	(TATATG)2	12	161243	161254		875	p6	(TATATG)2	12	158055	158066
951	p6	(TTTTTC)2	12	161188	161199		960	p6	(TTTTTC)2	12	161246	161257		962	p6	(TTTTTC)2	12	161439	161450		876	p6	(TTTTTC)2	12	158251	158262
952	p4	(CATT)3	12	161339	161350		961	p4	(CATT)3	12	161397	161408		963	p4	(CATT)3	12	161590	161601		877	p4	(CATT)3	12	158402	158413
953	p6	(ATTAGA)2	12	161569	161580		962	p6	(ATTAGA)2	12	161627	161638		964	p6	(ATTAGA)2	12	161820	161831		878	p6	(ATTAGA)2	12	158632	158643
954	p6	(TTTGCA)2	12	162143	162154		963	p6	(TTTGCA)2	12	162201	162212		965	p6	(TTTGCA)2	12	162394	162405		879	p6	(TTTGCA)2	12	159206	159217
955	p5	(CAATA)2	10	162670	162679		964	p5	(CAATA)2	10	162728	162737		966	p5	(CAATA)2	10	162921	162930		880	p5	(CAATA)2	10	159733	159742
956	p6	(TGCTAT)2	12	162757	162768		965	p6	(TGCTAT)2	12	162815	162826		967	p6	(TGCTAT)2	12	163008	163019		881	p6	(TGCTAT)2	12	159820	159831
957	p1	(A)10	10	162918	162927		966	p1	(A)10	10	162976	162985		968	p1	(A)10	10	163169	163178		882	p1	(A)10	10	159981	159990
958	c	(GAGTAT)2(TGGTAT)4	36	163110	163145		967	c	(GAGTAT)2(TGGTAT)4	36	163168	163203		969	c	(GAGTAT)2(TGGTAT)4	36	163361	163396		883	c	(GAGTAT)2(TGGTAT)4	36	160173	160208
959	p6	(TTTTCC)2	12	163226	163237		968	p6	(TTTTCC)2	12	163284	163295		970	p6	(TTTTCC)2	12	163477	163488		884	p6	(TTTTCC)2	12	160289	160300
960	p5	(CATTT)2	10	164005	164014		969	p5	(CATTT)2	10	164063	164072		971	p5	(CATTT)2	10	164256	164265		885	p5	(CATTT)2	10	161068	161077
961	p5	(AAATG)2	10	164646	164655		970	p5	(AAATG)2	10	164704	164713		972	p5	(AAATG)2	10	164897	164906		886	p5	(AAATG)2	10	161709	161718
962	p5	(TTTTC)2	10	165108	165117		971	p5	(TTTTC)2	10	165166	165175		973	p5	(TTTTC)2	10	165359	165368		887	p5	(TTTTC)2	10	162171	162180
963	p5	(TTCTG)2	10	165598	165607		972	p5	(TTCTG)2	10	165656	165665		974	p5	(TTCTG)2	10	165849	165858		888	p5	(TTCTG)2	10	162661	162670
964	p5	(ATTTT)2	10	165802	165811		973	p5	(ATTTT)2	10	165860	165869		975	p5	(ATTTT)2	10	166053	166062		889	p5	(ATTTT)2	10	162865	162874
965	p5	(CCATT)2	10	165982	165991		974	p5	(CCATT)2	10	166040	166049		976	p5	(CCATT)2	10	166233	166242		890	p5	(CCATT)2	10	163045	163054
966	p5	(TCCTC)2	10	166229	166238		975	p5	(TCCTC)2	10	166287	166296		977	p5	(TCCTC)2	10	166480	166489		891	p5	(TCCTC)2	10	163292	163301
967	p1	(T)16	16	166367	166382		976	p1	(T)16	16	166425	166440		978	p1	(T)16	16	166618	166633		892	p1	(T)16	16	163430	163445
968	p6	(AATAAG)2	12	166398	166409		977	p6	(AATAAG)2	12	166456	166467		979	p6	(AATAAG)2	12	166649	166660		893	p6	(AATAAG)2	12	163461	163472
969	p5	(TCCGC)2	10	167027	167036		978	p5	(TCCGC)2	10	167085	167094		980	p5	(TCCGC)2	10	167278	167287		894	p5	(TCCGC)2	10	164090	164099
970	p5	(CCCTG)2	10	168266	168275		979	p5	(CCCTG)2	10	168324	168333		981	p5	(CCCTG)2	10	168517	168526		895	p5	(CCCTG)2	10	165329	165338
971	p6	(CGCTTC)2	12	168518	168529		980	p6	(CGCTTC)2	12	168576	168587		982	p6	(CGCTTC)2	12	168769	168780		896	p6	(CGCTTC)2	12	165581	165592
972	p5	(TTTGG)2	10	170224	170233		981	p5	(TTTGG)2	10	170282	170291		983	p5	(TTTGG)2	10	170475	170484		897	p5	(TTTGG)2	10	167287	167296
973	p5	(GGAAA)2	10	171323	171332		982	p5	(GGAAA)2	10	171381	171390		984	p5	(GGAAA)2	10	171574	171583		898	p5	(GGAAA)2	10	168386	168395
974	p6	(TCAGTG)2	12	172971	172982		983	p6	(TCAGTG)2	12	173029	173040		985	p6	(TCAGTG)2	12	173222	173233		899	p6	(TCAGTG)2	12	170034	170045
975	p5	(TTCCA)2	10	173737	173746		984	p5	(TTCCA)2	10	173795	173804		986	p5	(TTCCA)2	10	173988	173997		900	p5	(TTCCA)2	10	170800	170809
976	p5	(TTGCG)2	10	174351	174360		985	p5	(TTGCG)2	10	174409	174418		987	p5	(TTGCG)2	10	174602	174611		901	p5	(TTGCG)2	10	171414	171423
977	p6	(TTCCGA)2	12	174377	174388		986	p6	(TTCCGA)2	12	174435	174446		988	p6	(TTCCGA)2	12	174628	174639		902	p6	(TTCCGA)2	12	171440	171451
978	p5	(CATTG)2	10	174688	174697		987	p5	(CATTG)2	10	174746	174755		989	p5	(CATTG)2	10	174939	174948		903	p5	(CATTG)2	10	171751	171760
979	p5	(TAATA)2	10	174872	174881		988	p5	(TAATA)2	10	174930	174939		990	p5	(TAATA)2	10	175123	175132		904	p5	(TAATA)2	10	171935	171944
980	p6	(AAAAGT)2	12	174896	174907		989	p6	(AAAAGT)2	12	174954	174965		991	p6	(AAAAGT)2	12	175147	175158		905	p6	(AAAAGT)2	12	171959	171970
981	p5	(CAACA)2	10	175002	175011		990	p5	(CAACA)2	10	175060	175069		992	p5	(CAACA)2	10	175253	175262		906	p5	(CAACA)2	10	172065	172074
982	c	(GGGATA)2(GAGGAA)2	24	175244	175267		991	c	(GGGATA)2(GAGGAA)2	24	175302	175325		993	c	(GGGATA)2(GAGGAA)2	24	175495	175518		907	c	(GGGATA)2(GAGGAA)2	24	172307	172330
983	p5	(AAAAG)2	10	175402	175411		992	p5	(AAAAG)2	10	175460	175469		994	p5	(AAAAG)2	10	175653	175662		908	p5	(AAAAG)2	10	172465	172474
984	p5	(GATTC)2	10	176234	176243		993	p5	(GATTC)2	10	176292	176301		995	p5	(GATTC)2	10	176485	176494		909	p5	(GATTC)2	10	173297	173306
985	p6	(GAAAAG)2	12	177285	177296		994	p6	(GAAAAG)2	12	177343	177354		996	p6	(GAAAAG)2	12	177536	177547		910	p6	(GAAAAG)2	12	174348	174359
986	p6	(TAAGAA)2	12	177347	177358		995	p6	(TAAGAA)2	12	177405	177416		997	p6	(TAAGAA)2	12	177598	177609		911	p6	(TAAGAA)2	12	174410	174421
987	p6	(GACCAA)2	12	178372	178383		996	p6	(GACCAA)2	12	178430	178441		998	p6	(GACCAA)2	12	178623	178634		912	p6	(GACCAA)2	12	175435	175446
988	p5	(AATCA)2	10	178672	178681		997	p5	(AATCA)2	10	178730	178739		999	p5	(AATCA)2	10	178923	178932		913	p5	(AATCA)2	10	175735	175744
989	p6	(GACTCT)2	12	178968	178979		998	p6	(GACTCT)2	12	179026	179037		1000	p6	(GACTCT)2	12	179219	179230		914	p6	(GACTCT)2	12	176031	176042
990	p6	(GCTTCA)2	12	179025	179036		999	p6	(GCTTCA)2	12	179083	179094		1001	p6	(GCTTCA)2	12	179276	179287		915	p6	(GCTTCA)2	12	176088	176099
991	p5	(TAGGG)2	10	179901	179910		1000	p5	(TAGGG)2	10	179959	179968		1002	p5	(TAGGG)2	10	180152	180161		916	p5	(TAGGG)2	10	176964	176973
992	p6	(TTAGGA)2	12	180003	180014		1001	p6	(TTAGGA)2	12	180061	180072		1003	p6	(TTAGGA)2	12	180254	180265		917	p6	(TTAGGA)2	12	177066	177077
993	p2	(AT)5	10	180071	180080		1002	p2	(AT)5	10	180129	180138		1004	p2	(AT)5	10	180322	180331		918	p2	(AT)5	10	177134	177143
994	p5	(ATGAC)2	10	180137	180146		1003	p5	(ATGAC)2	10	180195	180204		1005	p5	(ATGAC)2	10	180388	180397		919	p5	(ATGAC)2	10	177200	177209
995	p6	(TTGGAA)2	12	180448	180459		1004	p6	(TTGGAA)2	12	180506	180517		1006	p6	(TTGGAA)2	12	180699	180710		920	p6	(TTGGAA)2	12	177511	177522
996	p5	(TACAT)2	10	180644	180653		1005	p5	(TACAT)2	10	180702	180711		1007	p5	(TACAT)2	10	180895	180904		921	p5	(TACAT)2	10	177707	177716
997	p5	(TCGGG)2	10	180725	180734		1006	p5	(TCGGG)2	10	180783	180792		1008	p5	(TCGGG)2	10	180976	180985		922	p5	(TCGGG)2	10	177788	177797
998	c*	(AACAA)3(AATTAG)2*	25	180872	180896		1007	c*	(AACAA)3(AATTAG)2*	25	180930	180954		1009	c*	(AACAA)3(AATTAG)2*	25	181123	181147		923	c*	(AACAA)3(AATTAG)2*	25	177935	177959
999	p5	(TATTT)2	10	180985	180994		1008	p5	(TATTT)2	10	181043	181052		1010	p5	(TATTT)2	10	181236	181245		924	p5	(TATTT)2	10	178048	178057
1000	p1	(T)11	11	181064	181074		1009	p1	(T)11	11	181122	181132		1011	p1	(T)11	11	181315	181325		925	p1	(T)11	11	178127	178137
1001	p5	(TTTCA)2	10	181401	181410		1010	p5	(TTTCA)2	10	181459	181468		1012	p5	(TTTCA)2	10	181652	181661		926	p5	(TTTCA)2	10	178464	178473
1002	p6	(CCTTCT)2	12	182056	182067		1011	p6	(CCTTCT)2	12	182114	182125		1013	p6	(CCTTCT)2	12	182307	182318		927	p6	(CCTTCT)2	12	179119	179130
1003	p6	(CTTCTA)2	12	182240	182251		1012	p6	(CTTCTA)2	12	182298	182309		1014	p6	(CTTCTA)2	12	182491	182502		928	p6	(CTTCTA)2	12	179303	179314
1004	p5	(TTTTC)2	10	182747	182756		1013	p5	(TTTTC)2	10	182805	182814		1015	p5	(TTTTC)2	10	182998	183007		929	p5	(TTTTC)2	10	179810	179819
1005	p5	(ATTTA)2	10	182841	182850		1014	p5	(ATTTA)2	10	182899	182908		1016	p5	(ATTTA)2	10	183092	183101		930	p5	(ATTTA)2	10	179904	179913
1006	p6	(CTAATT)2	12	183047	183058		1015	p6	(CTAATT)2	12	183105	183116		1017	p6	(CTAATT)2	12	183298	183309		931	p6	(CTAATT)2	12	180110	180121
1007	p5	(CAATC)2	10	183707	183716		1016	p5	(CAATC)2	10	183765	183774		1018	p5	(CAATC)2	10	183958	183967		932	p5	(CAATC)2	10	180770	180779
1008	p6	(TTTTTC)2	12	183728	183739		1017	p6	(TTTTTC)2	12	183786	183797		1019	p6	(TTTTTC)2	12	183979	183990		933	p6	(TTTTTC)2	12	180791	180802
1009	p5	(TTCAG)2	10	184009	184018		1018	p5	(TTCAG)2	10	184067	184076		1020	p5	(TTCAG)2	10	184260	184269		934	p5	(TTCAG)2	10	181072	181081
1010	p5	(TTGAA)2	10	184709	184718		1019	p5	(TTGAA)2	10	184767	184776		1021	p5	(TTGAA)2	10	184960	184969		935	p5	(TTGAA)2	10	181772	181781
1011	p5	(GGATC)2	10	184873	184882		1020	p5	(GGATC)2	10	184931	184940		1022	p5	(GGATC)2	10	185124	185133		936	p5	(GGATC)2	10	181936	181945
1012	p6	(TTTTGG)2	12	186156	186167		1021	p6	(TTTTGG)2	12	186214	186225		1023	p6	(TTTTGG)2	12	186407	186418		937	p6	(TTTTGG)2	12	183219	183230
1013	p5	(CAAAT)2	10	187210	187219		1022	p5	(CAAAT)2	10	187268	187277		1024	p5	(CAAAT)2	10	187461	187470		938	p5	(CAAAT)2	10	184273	184282
1014	p5	(CGGAT)2	10	187582	187591		1023	p5	(CGGAT)2	10	187640	187649		1025	p5	(CGGAT)2	10	187833	187842		939	p5	(CGGAT)2	10	184645	184654
1015	p5	(ATTTC)2	10	188310	188319		1024	p5	(ATTTC)2	10	188368	188377		1026	p5	(ATTTC)2	10	188561	188570		940	p5	(ATTTC)2	10	185373	185382
1016	p5	(TGGTA)2	10	188514	188523		1025	p5	(TGGTA)2	10	188572	188581		1027	p5	(TGGTA)2	10	188765	188774		941	p5	(TGGTA)2	10	185577	185586
1017	p5	(TATTC)2	10	188848	188857		1026	p5	(TATTC)2	10	188906	188915		1028	p5	(TATTC)2	10	189099	189108		942	p5	(TATTC)2	10	185911	185920
1018	p5	(TATTC)2	10	188869	188878		1027	p5	(TATTC)2	10	188927	188936		1029	p5	(TATTC)2	10	189120	189129		943	p5	(TATTC)2	10	185932	185941
1019	p5	(AATCC)2	10	188990	188999		1028	p5	(AATCC)2	10	189048	189057		1030	p5	(AATCC)2	10	189241	189250		944	p5	(AATCC)2	10	186053	186062
1020	p5	(CATTT)2	10	189589	189598		1029	p5	(CATTT)2	10	189647	189656		1031	p5	(CATTT)2	10	189840	189849		945	p5	(CATTT)2	10	186652	186661
1021	p5	(ACATA)2	10	190004	190013		1030	p5	(ACATA)2	10	190062	190071		1032	p5	(ACATA)2	10	190255	190264		946	p5	(ACATA)2	10	187067	187076
1022	p6	(CTTTAC)2	12	190456	190467		1031	p6	(CTTTAC)2	12	190514	190525		1033	p6	(CTTTAC)2	12	190707	190718		947	p6	(CTTTAC)2	12	187519	187530
1023	p6	(CTCGAG)2	12	191147	191158		1032	p6	(CTCGAG)2	12	191205	191216		1034	p6	(CTCGAG)2	12	191398	191409		948	p6	(CTCGAG)2	12	188210	188221
1024	p5	(TATTG)2	10	191199	191208		1033	p5	(TATTG)2	10	191257	191266		1035	p5	(TATTG)2	10	191450	191459		949	p5	(TATTG)2	10	188262	188271
1025	p5	(TCAAA)2	10	191351	191360		1034	p5	(TCAAA)2	10	191409	191418		1036	p5	(TCAAA)2	10	191602	191611		950	p5	(TCAAA)2	10	188414	188423
1026	p6	(AATTCT)2	12	192068	192079		1035	p6	(AATTCT)2	12	192126	192137		1037	p6	(AATTCT)2	12	192319	192330		951	p6	(AATTCT)2	12	189131	189142
1027	p5	(CAGTT)2	10	192607	192616		1036	p5	(CAGTT)2	10	192665	192674		1038	p5	(CAGTT)2	10	192858	192867		952	p5	(CAGTT)2	10	189670	189679
1028	p5	(TATTC)2	10	193021	193030		1037	p5	(TATTC)2	10	193079	193088		1039	p5	(TATTC)2	10	193272	193281		953	p5	(TATTC)2	10	190084	190093

## Sheet: Table S3
Table S3. Information of long sequence repeats across four Korean Asarum species.
	Length (bp)				Type*				Location
Species	A. sieboldii	A. misandrum	A. maculatum	A. heterotropoides	A. sieboldii	A. misandrum	A. maculatum	A. heterotropoides	A. sieboldii	A. misandrum	A. maculatum	A. heterotropoides
1	63	53	52	56	F	R	R	F	atpH~atpF	atpH~atpF	atpH~atpF	atpH~atpF
2	96	55	45	54	F	F	F	R	atpH~atpF	atpH~atpF	atpH~atpF	atpH~atpF
3	84	64	52	43	F	F	F	F	atpH~atpF	atpH~atpF	trnG-UCC~trnS-GCU	atpH~atpF
4	87	96	58	58	R	R	P	F	atpH~atpF	atpH~atpF	trnG-UCC~trnS-GCU	trnG-UCC~trnS-GCU
5	120	50	47	51	R	F	F	F	atpH~atpF	atpH~atpF	trnK-UUU~psbA	trnG-UCC~trnS-GCU
6	71	51	59	58	R	F	F	P	atpH~atpF	atpH~atpF	psbA~trnH-GUG	trnG-UCC~trnS-GCU
7	59	51	115	59	R	R	F	F	atpH~atpF	atpH~atpF	trnH-GUG~trnT-GGU	psbA~trnH-GUG
8	58	59	53	50	P	R	F	F	trnG-UCC~trnS-GCU	atpH~atpF	trnH-GUG~trnT-GGU	psbA~trnH-GUG
9	62	45	42	59	F	F	F	R	matK~psbA	atpH~atpF	trnH-GUG~trnT-GGU	trnH-GUG~trnT-GGU
10	52	58	49	42	F	P	P	F	psbA~trnH-GUG	trnG-UCC~psbI	ycf3	trnH-GUG~trnT-GGU
11	82	47	46	49	F	F	F	R	psbA~trnH-GUG	trnK-UUU~psbA	ycf3	ycf3
12	59	59	68	46	F	F	R	F	psbA~trnH-GUG	psbA~psbD	ycf3	ycf3
13	59	115	60	45	P	F	F	F	psbA~trnH-GUG	psbA~psbD	ycf3	ycf3
14	115	62	51	56	F	R	F	F	trnH-GUG~trnT-GGU	ycf3	ycf3	ycf3
15	62	60	55	47	R	F	F	F	ycf3	ycf3	ycf3	ndhC~trnV-UAC
16	60	51	45	53	F	F	R	R	ycf3	ycf3	ycf3	ndhC~trnV-UAC
17	51	45	60	52	F	R	F	F	ycf3	ycf3	ndhC~trnV-UAC	ndhC~trnV-UAC
18	60	87	76	50	F	F	F	F	ndhC~trnV-UAC	ndhC~trnV-UAC	ndhC~trnV-UAC	ndhC~trnV-UAC
19	62	60	53	51	F	F	R	F	ndhC~trnV-UAC	ndhC~trnV-UAC	ndhC~trnV-UAC	ndhC~trnV-UAC
20	55	53	46	53	R	R	F	F	ndhC~trnV-UAC	ndhC~trnV-UAC	ndhC~trnV-UAC	ndhC~trnV-UAC
21	83	46	54	58	F	F	R	F	ndhC~trnV-UAC	ndhC~trnV-UAC	ndhC~trnV-UAC	petD~rpoA
22	72	54	43	52	R	R	R	R	ndhC~trnV-UAC	ndhC~trnV-UAC	ndhC~trnV-UAC	petD~rpoA
23	67	63	63	63	R	F	F	F	ndhC~trnV-UAC	ycf2	ycf2	ycf2
24	67	63	63	63	R	P	P	P	ndhC~trnV-UAC	ycf2	ycf2	ycf2
25	50	63	63	63	R	P	P	P	ndhC~trnV-UAC	ycf2	ycf2	ycf2
26	63	95	95	95	F	R	R	R	ycf2	ndhG~ndhE	ndhG~ndhE	ndhG~ndhE
27	63	95	95	95	P	C	C	C	ycf2	ndhG~ndhE	ndhG~ndhE	ndhG~ndhE
28	63	75	75	75	P	F	F	F	ycf2	ndhG~ndhE	ndhG~ndhE	ndhG~ndhE
29	95	75	75	75	R	P	P	P	ndhG~ndhE	ndhG~ndhE	ndhG~ndhE	ndhG~ndhE
30	95	71	71	71	C	R	R	R	ndhG~ndhE	ndhG~ndhE	ndhG~ndhE	ndhG~ndhE
31	75	71	71	71	F	C	C	C	ndhG~ndhE	ndhG~ndhE	ndhG~ndhE	ndhG~ndhE
32	75	51	51	51	P	F	F	F	ndhG~ndhE	ndhG~ndhE	ndhG~ndhE	ndhG~ndhE
33	71	51	51	51	R	P	P	P	ndhG~ndhE	ndhG~ndhE	ndhG~ndhE	ndhG~ndhE
34	71	47	47	47	C	R	R	R	ndhG~ndhE	ndhG~ndhE	ndhG~ndhE	ndhG~ndhE
35	51	47	47	47	F	C	C	C	ndhG~ndhE	ndhG~ndhE	ndhG~ndhE	ndhG~ndhE
36	51	79	79	79	P	R	R	R	ndhG~ndhE	ndhG~ndhE	ndhG~ndhE	ndhG~ndhE
37	79	79	79	79	R	C	C	C	ndhG~ndhE	ndhG~ndhE	ndhG~ndhE	ndhG~ndhE
38	79	75	75	75	C	P	P	P	ndhG~ndhE	ndhG~ndhE	ndhG~ndhE	ndhG~ndhE
39	75	55	55	55	P	R	R	R	ndhG~ndhE	ndhG~ndhE	ndhG~ndhE	ndhG~ndhE
40	55	55	55	55	R	C	C	C	ndhG~ndhE	ndhG~ndhE	ndhG~ndhE	ndhG~ndhE
41	55	51	51	51	C	P	P	P	ndhG~ndhE	ndhG~ndhE	ndhG~ndhE	ndhG~ndhE
42	51	79	79	79	P	R	R	R	ndhE~ndhG	ndhE~ndhG	ndhE~ndhG	ndhE~ndhG
43	79	75	75	75	R	F	F	F	ndhE~ndhG	ndhE~ndhG	ndhE~ndhG	ndhE~ndhG
44	75	55	55	55	F	R	R	R	ndhE~ndhG	ndhE~ndhG	ndhE~ndhG	ndhE~ndhG
45	55	51	51	51	R	F	F	F	ndhE~ndhG	ndhE~ndhG	ndhE~ndhG	ndhE~ndhG
46	51	95	95	95	F	R	R	R	ndhE~ndhG	ndhE~ndhG	ndhE~ndhG	ndhE~ndhG
47	95	71	71	71	R	R	R	R	ndhE~ndhG	ndhE~ndhG	ndhE~ndhG	ndhE~ndhG
48	71	47	47	47	R	R	R	R	ndhE~ndhG	ndhE~ndhG	ndhE~ndhG	ndhE~ndhG
49	63	63	63	63	F	F	F	F	ycf2	ycf2	ycf2	ycf2
* Each alphabet indicate the repeat types. F, forward repeats; R, reverse repeats; P, palindromic repeats; C, complement repeats

## Sheet: Table S4
Table S. Sequence information of species used in phylogenetic analysis.
No.	Scientific name	GenBank accession Number	Family	Section	Etc
1	Aristolochia contorta	NC_036152	Aristolochiaceae		Chinese accession
2	Aristolochia contorta*	MN132861	Aristolochiaceae		Korean accession
3	Aristolochia manshuriensis	MN132862	Aristolochiaceae
4	Aristolochia debilis	NC_036153	Aristolochiaceae
5	Aristolochia kunmingensis	NC_041451	Aristolochiaceae
6	Aristolochia tubiflora	NC_041456	Aristolochiaceae
7	Aristolochia kaempferi	NC_041452	Aristolochiaceae
8	Aristolochia mollissima	NC_041457	Aristolochiaceae
9	Aristolochia moupinensis	NC_041454	Aristolochiaceae
10	Aristolochia tagala	NC_041455	Aristolochiaceae
11	Aristolochia macrophylla	NC_041453	Aristolochiaceae
12	Asarum canadense	MG544845-MG544851	Aristolochiaceae	Asarum
13	Asarum heterotropoides	MK577409	Aristolochiaceae	Asiasarum	Chinese accession	Xinbin County, Liaoning Province (124º45' 56.17"N, 41º23'17.38"E, 520 m at attitude)
14	Asarum heterotropoides var. mandshuricum	MW526993	Aristolochiaceae	Asiasarum	Chinese accession	Jilin,Changchun
15	Asarum heterotropoides*	MN132860	Aristolochiaceae	Asiasarum	Korean accession
16	Asarum maculatum*	MN132859	Aristolochiaceae	Asiasarum
17	Asarum misandrum*	MN132858	Aristolochiaceae	Asiasarum
18	Asarum sieboldii	MG551543	Aristolochiaceae	Asiasarum	Korean accession
19	Asarum sieboldii	MW034667	Aristolochiaceae	Asiasarum	Chinese accession
20	Asarum sieboldii	MG554434-MG554440	Aristolochiaceae	Asiasarum	Unknown locality
21	Asarum costatum	AP018513	Aristolochiaceae	Heterotropa
22	Asarum forbesii	LC529900	Aristolochiaceae	Heterotropa
23	Asarum macranthum	LC529904	Aristolochiaceae	Heterotropa
24	Asarum megacalyx	MG554449-MG554458	Aristolochiaceae	Heterotropa
25	Asarum minamitanianum	AP018514	Aristolochiaceae	Heterotropa
26	Asarum sakawanum	AP017908	Aristolochiaceae	Heterotropa
27	Asarum satsumense	LC529901	Aristolochiaceae	Heterotropa
28	Asarum minus	MG554421-MG554425	Aristolochiaceae	Hexastylis
29	Asarum shuttleworthii	LC529902	Aristolochiaceae	Hexastylis
30	Asarum epigynum	MG554441-MG554448	Aristolochiaceae	Geotaenium
31	Asarum delavayi	MG554426-MG554433	Aristolochiaceae	Longistylis
32	Saruma henryi	NC_039933	Aristolochiaceae
33	Piper cenocladum	DQ887677	Piperaceae		Outgroup
34	Piper kadsura	KT223569	Piperaceae		Outgroup
*, newly sequenced in this study

## Sheet: Table S5
Table S5. Voucher information of Korean Asarum and Aristolochia species examined in this study.
Taxon	Locality	Voucher no.
Asarum heterotropoides F. Schmidt	Mt. Baekun, Pocheon-si, Gyeonggi-do, Korea	NIBRVP0000640693
Asarum maculatum Nakai	Gujwa-eup, Jeju-si, Jeju-do, Korea	NIBRVP0000640516
Asarum misandrum B. U. Oh & J. G. Kim	Mt. Mandeok, Gangjin-gun, Jeollanam-do, Korea	NIBRVP0000640514
Aristolochia contorta Bunge	Yongjang-ri, Jindo-gun, Jeollanam-do, Korea	NIBRVP0000575952
